# Supplementary material for: PGC-1α and PGC-1β Increase Protein Synthesis via ERRα in C2C12 Myotubes
Source: PubMed Central journal article supplement (PMC6190860; doi:10.3389/fphys.2018.01336), 2018-09-25
Supplement: Data_Sheet_1.pdf [file Data_Sheet_1.pdf]

# PGC-1 $\alpha$ and PGC-1 $\beta$ increase protein synthesis via ERR $\alpha$ in C2C12 myotubes

Erin L. Brown<sup>1§\*</sup>, Victoria C. Foletta<sup>1</sup>, Craig R. Wright<sup>1</sup>, Patricio V. Sepulveda<sup>1</sup>, Nicky Konstantopoulos<sup>2</sup>, Andrew Sanigorski<sup>2</sup>, Paul Della Gatta<sup>1</sup>, David Cameron-Smith<sup>3</sup>, Anastasia Kralli<sup>4</sup>, Aaron P. Russell<sup>1</sup>

\*Correspondence: Dr. Erin Brown: e-mail: [erin.brown@sund.ku.dk](mailto:erin.brown@sund.ku.dk)

## Supplementary Data

The datasets for this study can be found in Supplementary Files 1, 2 and 3.

## Supplementary Figures and Tables

### Supplementary Figures

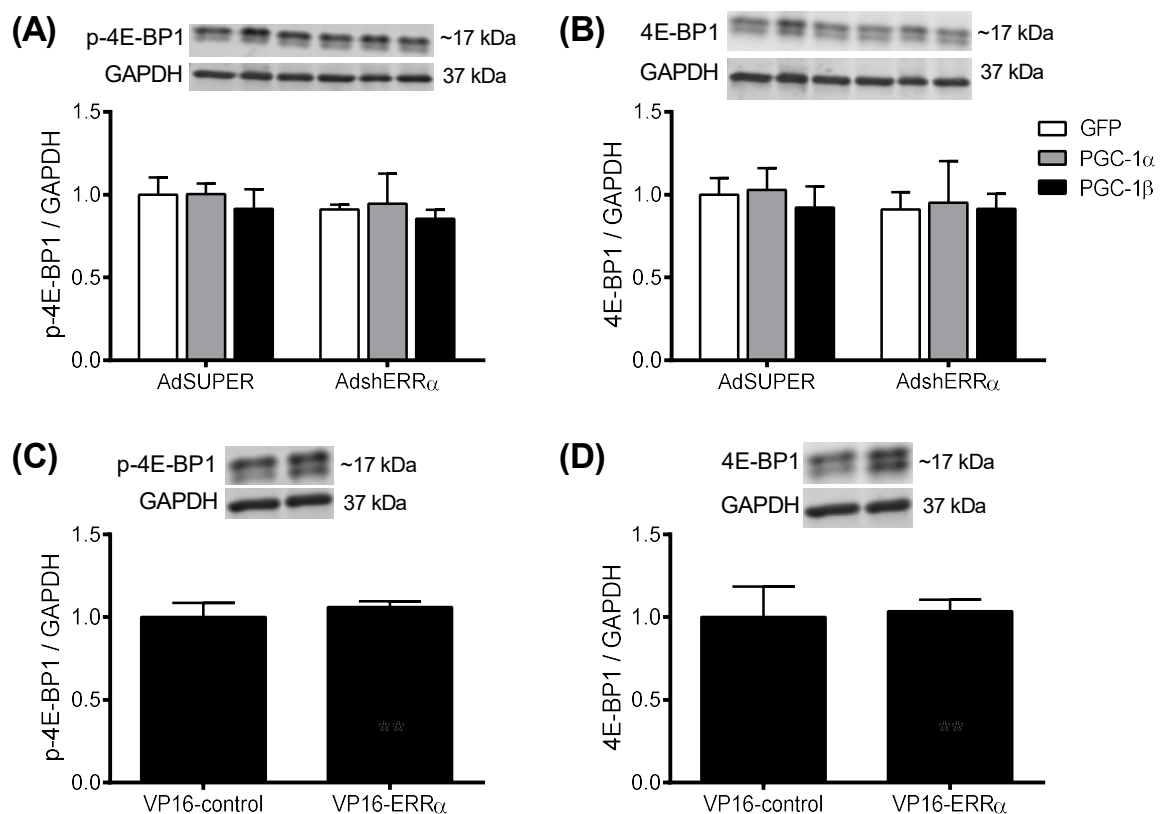

**Supplementary Figure 1.** Phospho and total 4E-BP1 protein expression in C2C12 myotubes infected with shERR $\alpha$  and PGC-1 or VP16-ERR $\alpha$  adenoviruses. (A) p-4E-BP1, and (B) 4E-BP1, in myotubes infected with either AdSUPER or AdshERR $\alpha$  for 24 hours, followed by infection with GFP, PGC-1 $\alpha$  or PGC-1 $\beta$  for a further 48 hours. Samples were harvested after 96 hours. (C) p-4E-BP1, and (D) 4E-BP1, in myotubes infected with VP16-control or VP16-ERR $\alpha$  adenoviruses for 48 hours. Samples were harvested after 72 hours. Bands were normalized to GAPDH protein; n = 3 per group.

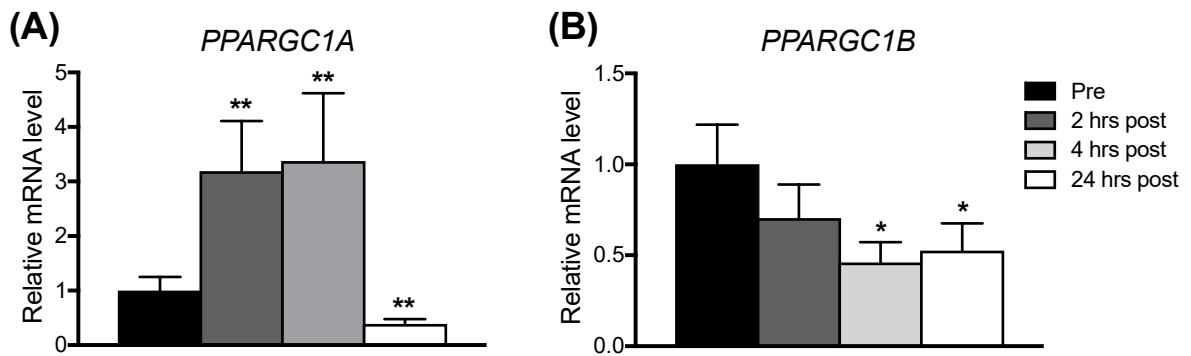

**Supplementary Figure 2.** PPARGC1A and PPARGC1B mRNA expression in skeletal muscle after an acute bout of resistance exercise in humans. (A) PPARGC1A mRNA, and (B) PPARGC1B mRNA when measured prior to and 2, 4 and 24 hours after resistance exercise. Values were normalized to 36B4 mRNA expression. n = 8. \*P < 0.05, \*\*P < 0.01 vs. Pre-exercise.

**(A) Phospho-Akt**

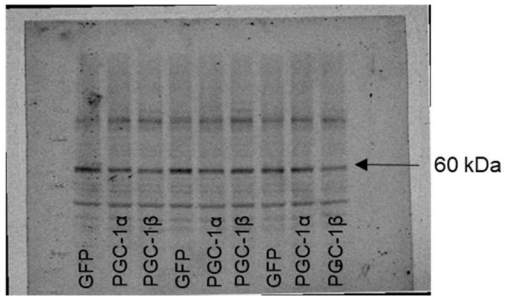

**(B) Akt**

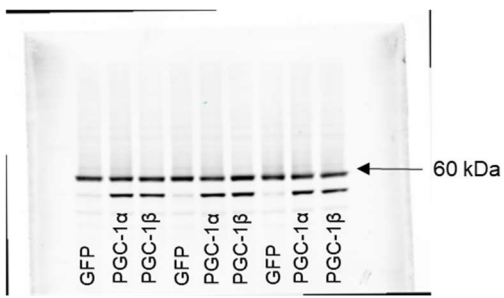

**(C) Phospho-p70S6k**

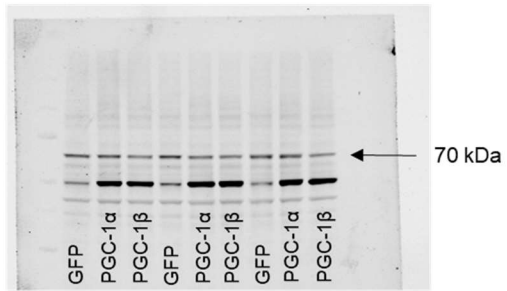

**(D) p70S6k**

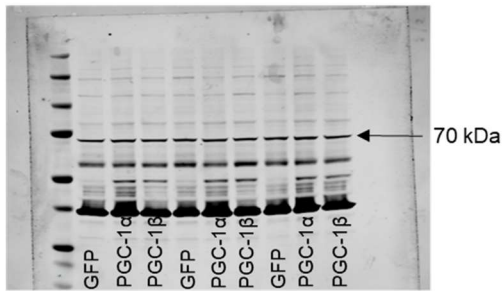

**(A-D) GAPDH**

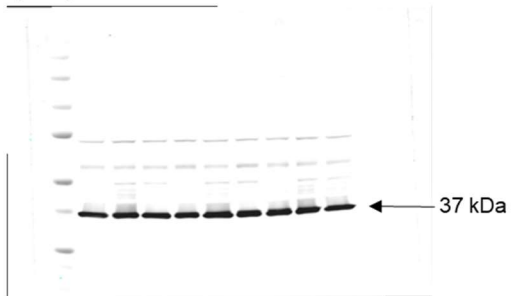

**Supplementary Figure 3.** Full scans of western blots displayed in Figure 2.

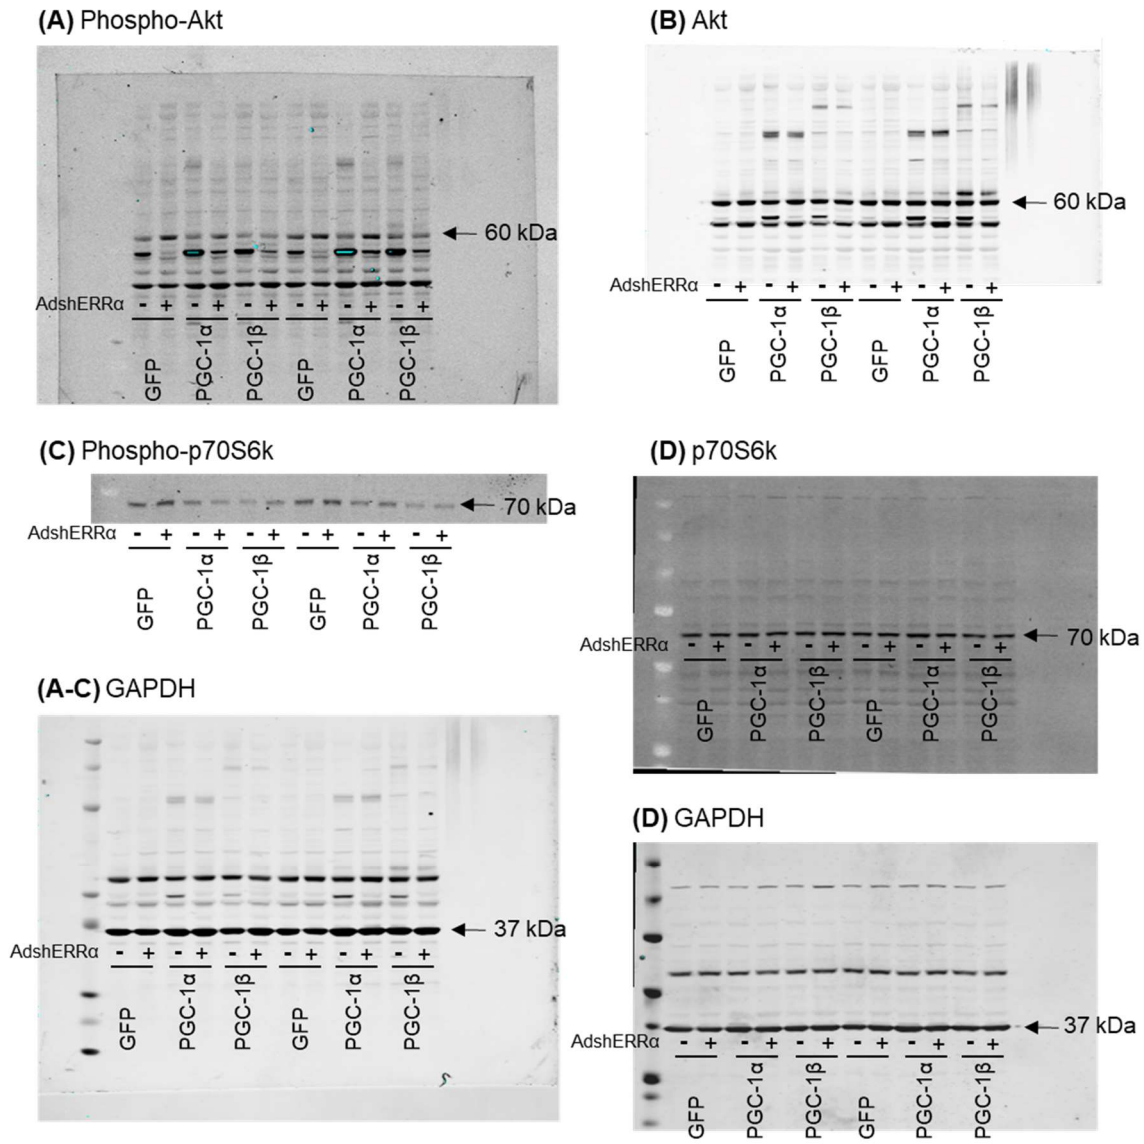

**Supplementary Figure 4.** Full scans of western blots displayed in Figure 4.

**(A) Phospho-Akt**

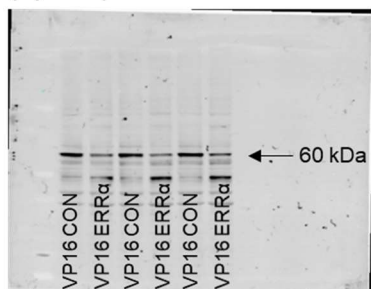

**(B) Akt**

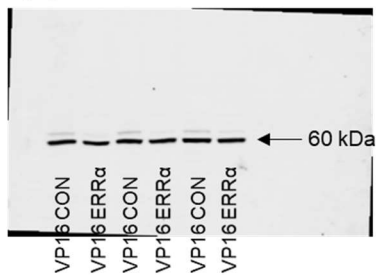

**(C) Phospho-p70S6k**

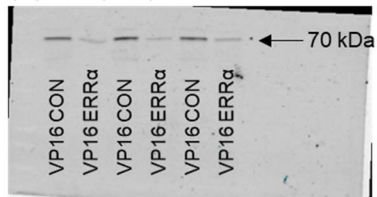

**(D) p70S6k**

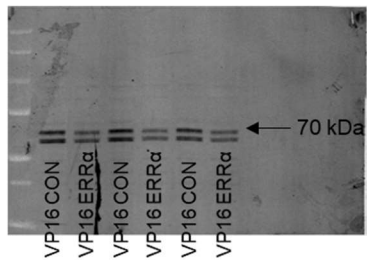

**(A) GAPDH**

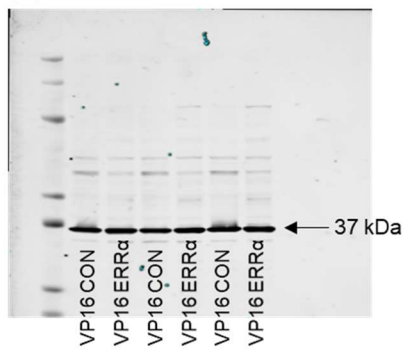

**(B, C) GAPDH**

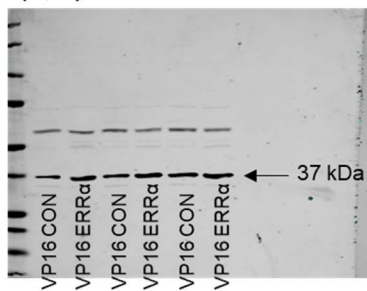

**(D) GAPDH**

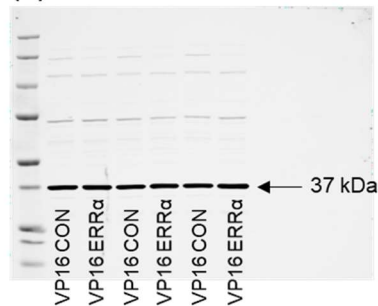

**Supplementary Figure 5.** Full scans of western blots displayed in Figure 6.

## Supplementary Tables

**Supplementary Table 1.** Mouse and Human Primers used in the RT-PCR

| <b>Primer</b> | <b>GenBank accession no.</b> | <b>Forward Primer (5'-3')</b> | <b>Reverse Primer (5'-3')</b> |
|---------------|------------------------------|-------------------------------|-------------------------------|
| h-Ppargc1a    | NM_013261.3                  | TCAGTCCTCACTGGTGGACA          | TGCTTCGTCGTCAAAAACAG          |
| h-Ppargc1b    | NM_133263.3                  | CTGCTGGCCCAGATACTACTGA        | ATCCATGGCTTCATACTTGCT         |
| m-Ppp1r16a    | NM_033371.2                  | GCTGCACATCGCCGCTGCTA          | GGCCCCGAGGAGTGCATCTT          |
| m-Mrps9       | NM_023514.3                  | CACGGCACAGGCGGTCTGTTT         | CAAGCGTATGGCGCCTGCCT          |
| m-Tarbp2      | NM_009319.1                  | CAGCTGCACTGGTCAGGGCC          | GTGCAGCCTGGCCCACGATT          |
| m-Cdc14b      | NM_172587.2                  | GCGTGAAGAAGAGCCGCAGC          | ACCATGGCCAGATTGAGTGGTCC       |
| m-Exoc1       | NM_027270.1                  | CACCACGTGTGGACCCGACA          | TCGCCACGGCGTTCAGCATT          |
| m-Trim25      | NM_009546.2                  | CCCGAGCATGGCGAGTGCAT          | GCTGGTCTCTGCTGCGTCGA          |
| m-Trim32      | NM_053084.1                  | GTGGACTCGCGTCGGAGCTG          | GGGCAGCGGACGCCATTGAT          |
| m-Eef1a2      | NM_007906.2                  | CAGTTCACCTCTCAGGTTATCATCCT    | GCCGTGTGACAGTCGATGAC          |
| m-Eif2b4      | NM_001127356.1               | CTTCTCCCACCTGCCTCAGTA         | CAGAGGATGGGATGCTCATGTA        |
| m-Eif4e3      | NM_025829.4                  | ACCATTGGAGAGCAGTTCACAGA       | TCACGCTGACTCCGATGATC          |
| m-Casp1       | NM_009807.2                  | AAAAGCCCAGAAGTTATGGAAAGA      | GACGTGTACGAGTGGTTGTATTCAT     |
| m-Tceal7      | NM_001127169.1               | AACCCTGCGGAGCACTTG            | TGAAGCAACCTCTGTCTGAAATTG      |
| m-Tsc22d3     | NM_001077364.1               | TTCTCCATCTCCTTCTTTTCTCTCT     | CTCCGGAGGCACTGTTATCC          |
| m-Prnp        | NM_011170.2                  | CACCGAGACCGATGTGAAGA          | GGTACTGGGTGACGCACATCT         |
| m-36B4        | NM_007475.5                  | TTGTGGGAGCAGACAATGTG          | AGTCCTCCTTGGTGAACACG          |
| h-Ppp1r16a    | NM_032902.5                  | ACGCCCTTGATGTGTGCGG           | GAGGGCGTCGTGCTTGTGCT          |
| h-Mrps9       | NM_182640.2                  | GCCCTGTGTGTCTACGGCG           | CAGAGGCCCTTGCTCCGGGC          |
| h-Tarbp2      | NM_134323.1                  | TCAGCAGTCTGAGTGCAACC          | GTGCCACTCCCAATCTCAAT          |
| h-Cdc14b      | NM_003671.3                  | TCGACCTCGCCGGGTGTGAA          | ACACGTGCTCCTGGGGTCC           |
| h-Exoc1       | NM_018261.3                  | AGGCCTGCACCAATGCTGCT          | CTGGCCAGTCTCCGGGCAAA          |
| h-Trim25      | NM_005082.4                  | CGACCTGGAGGCCACCCTGA          | CCGCACATCCTGCTGCCTGT          |
| h-Trim32      | NM_012210.3                  | GGAGGCCACAGCGTCTGCTG          | GGCAACCACTTCTCCGGGC           |
| h-Eef1a2      | NM_001958.3                  | CGTGGGCGTGAACAAAATG           | TCGTAGCGCTTCTCGCTGTA          |
| h-Eif2b4      | NM_172195.3                  | CCGGTGTATTGCCCTGCTT           | CATTAGGCGGTGTTGTGTAATCC       |
| h-Eif4e3      | NM_001134651.1               | GCAGCAGATGATGAAGTAATAGGAGTT   | AGTGCCCATCTGTTCTGTAGGGA       |
| h-Casp1       | NM_001223.4                  | CTGCTCTCCACACCAGATAATGT       | TCCAATAAAAACAGAGCCCATTG       |
| h-Tceal7      | NM_152278.3                  | CGCCCGTATGGAGAAATTTGA         | GAAGCAGCCTCTGTCTAAAATTCC      |
| h-Tsc22d3     | NM_198057.2                  | TGGCCATAGACAACAAGATCGA        | TCACAGCATAACATCAGATGATTCTTC   |
| h-Prnp        | NM_000311.3                  | ATGGAGCGCGTGGTTGA             | GGCCTGAGATTCCCTCTCGTA         |
| h-36B4        | NM_001002                    | GTGATGTGCAGCTGATCAAGACT       | GATGACCAGCCCAAAGGAGA          |

m = mouse, h = human.

**Supplementary Table 2.** Characteristics of subjects in the resistance exercise study.

---

|                                |             |
|--------------------------------|-------------|
| <b>Age (years)</b>             | 22.0 ± 05   |
| <b>Height (m)</b>              | 1.79 ± 0.05 |
| <b>Body mass (kg)</b>          | 83.3 ± 19.1 |
| <b>BMI (kg.m<sup>-2</sup>)</b> | 24.1 ± 0.1  |

---
