# Supplementary material for: PGC-1α and PGC-1β Increase Protein Synthesis via ERRα in C2C12 Myotubes
Source: Front Physiol. 2018 Sep 25;9:1336. doi: 10.3389/fphys.2018.01336 (PMC6190860; doi:10.3389/fphys.2018.01336)
Supplement: Supplementary file 1 [file Table_1.XLSX]

## Sheet: PGC-1alpha
Supplementary File 1. Genes detected via microarray analysis as being significantly regulated by either PGC-1α (Sheet 1) or PGC-1β (Sheet 2) overexpression vs. GFP (control), using a 1.5-fold cut-off (P < 0.05). C2C12 myotubes were infected with either GFP, PGC-1α or PGC-1β adenoviruses and RNA was harvested after 72 hours. n = 6 for GFP and PGC-1β, and 3 for PGC-1α.
Transcript	Gene Symbol	p-value	Fold-Change (GFP vs.PGC-1a)	NCBI Accession
ILMN_218610	Ckmt2	1.29e-19	22.4888	NM_198415.1
ILMN_215598	Cox7a1	4.5e-17	12.0244	NM_009944.3
ILMN_244950	EG433229	6.39e-17	8.68989	XM_899874.3
ILMN_214177	Eef1a2	5.42e-16	10.8911	NM_007906.2
ILMN_198408	LOC226017	1.63e-15	9.43606	XM_129164.2
ILMN_223612	Esrra	2.18e-15	4.44013	NM_007953.2
ILMN_214607	Rpl3l	2.65e-15	4.56228	NM_025425.3
ILMN_220588	Pdk4	2.85e-15	4.30118	NM_013743.2
ILMN_217987	Csrp3	6.43e-15	-3.48877	NM_013808.3
ILMN_216567	Hcn2	6.63e-15	4.38205	NM_008226.2
ILMN_216083	Hba-a1	7.98e-15	11.2018	NM_008218.2
ILMN_212812	Nme7	8.88e-15	4.18014	NM_138314.2
ILMN_209043	9530058B02Rik	9.93e-15	6.59667	NM_026633.3
ILMN_210014	Oxct1	1.37e-14	3.51888	NM_024188.5
ILMN_235471	Ckmt1	1.92e-14	4.7592	NM_009897.2
ILMN_220378	Slc2a4	2.43e-14	2.81424	NM_009204.2
ILMN_217547	2310042D19Rik	3.59e-14	8.57793	NM_172417.1
ILMN_222397	Chchd10	6.35e-14	9.42494	NM_175329.3
ILMN_219387	Hccs	8.26e-14	2.32848	NM_008222.2
ILMN_215976	Psmb10	9.47e-14	3.55044	NM_013640.2
ILMN_214204	Ndrg2	9.49e-14	4.47653	NM_013864
ILMN_184853	Trib3	1.05e-13	4.73965	NM_175093.2
ILMN_226905	Rilp	1.19e-13	3.26875	NM_001029938.1
ILMN_205586	B430219N15Rik	1.27e-13	2.63148	AK046650
ILMN_232786	Alox5	1.29e-13	-3.56098	NM_009662.2
ILMN_223004	Dlat	1.3e-13	4.31837	NM_145614.3
ILMN_211824	Tfrc	1.51e-13	3.50116	NM_011638.3
ILMN_211007	Slc25a19	1.54e-13	3.77834	NM_026071.2
ILMN_218079	Tspan32	2.1e-13	-4.41566	NM_020286.2
ILMN_191891	Tnni3	2.28e-13	4.75276	NM_009406.3
ILMN_188390	Uqcrc1	2.49e-13	2.86778	NM_025407.2
ILMN_219740	Psca	2.66e-13	6.95644	NM_028216.1
ILMN_210798	Fabp3	3.33e-13	4.95574	NM_010174.1
ILMN_213697	Ogdh	3.76e-13	4.47975	NM_010956.3
ILMN_212186	Ccbl1	4.57e-13	2.41721	NM_172404.2
ILMN_221418	Mrpl12	4.77e-13	3.07691	NM_027204.2
ILMN_235158	Atp5o	5.34e-13	2.44996	NM_138597.2
ILMN_212852	Mdh1	6.01e-13	4.05988	NM_008618.2
ILMN_223681	Atp1b1	6.31e-13	6.31741	NM_009721.4
ILMN_223696	Cs	7.94e-13	2.98552	NM_026444.3
ILMN_221774	Idh3a	8.13e-13	4.54067	NM_029573.2
ILMN_219800	Fahd1	8.47e-13	4.25879	NM_023480.2
ILMN_255859	Tmprss13	1.2e-12	1.72367	NM_001013373.2
ILMN_211245	Bola3	1.28e-12	2.348	NM_175277.2
ILMN_215732	Rhot2	1.65e-12	3.13953	NM_145999.2
ILMN_249427	Pln	1.79e-12	1.60068	NM_023129.3
ILMN_257523	Slc25a35	1.97e-12	2.2157	NM_028048.2
ILMN_222245	BC022224	1.97e-12	5.41813	NM_177564.4
ILMN_212573	Serpinb6c	2.04e-12	-2.50089	NM_148942.2
ILMN_215485	Ppif	2.28e-12	4.70796	NM_134084.1
ILMN_211390	Fsd2	2.67e-12	2.52962	NM_172904.2
ILMN_211494	2310005E10Rik	2.76e-12	2.51783	NM_172398.3
ILMN_223048	Cycs	3.3e-12	3.15889	NM_007808.4
ILMN_219924	Tceal7	3.51e-12	-4.56192	XM_136051.3
ILMN_220785	Nppb	3.52e-12	4.79581	NM_008726.3
ILMN_223470	Cyc1	3.53e-12	3.41326	NM_025567.2
ILMN_221583	Sirt3	3.54e-12	3.27855	NM_022433.1
ILMN_226239	Pnpla2	3.82e-12	3.41417	NM_025802.2
ILMN_217333	Ndufa8	4.05e-12	2.34651	NM_026703.1
ILMN_223812	BC019806	4.38e-12	3.02251	NM_145460
ILMN_231110	Rhox10	4.95e-12	-2.31928	NM_001024850.2
ILMN_191704	Pdss1	5.08e-12	4.04631	NM_019501.3
ILMN_196369	Aco2	5.58e-12	3.40106	NM_080633.2
ILMN_222241	Fa2h	5.62e-12	2.7987	NM_178086.2
ILMN_230382	Qrsl1	5.67e-12	2.79026	NM_001081054.2
ILMN_215825	Akr1b7	5.72e-12	5.43862	NM_009731.1
ILMN_188946	Ung	5.84e-12	3.51663	NM_011677.2
ILMN_239825	Serpinb9f	6.4e-12	-2.44326	NM_183197.1
ILMN_221363	Ndufb3	6.6e-12	1.91939	NM_025597.2
ILMN_249043	Acadvl	6.89e-12	2.64747	NM_017366.1
ILMN_233962	ENSMUSG00000054212	7.47e-12	2.6441	NM_145433.1
ILMN_227083	Acadm	7.69e-12	2.66376	NM_007382.1
ILMN_220222	Mfn1	7.86e-12	3.12606	NM_024200.2
ILMN_227596	Impa2	7.86e-12	2.72808	NM_053261.2
ILMN_199761	LOC383897	8.09e-12	3.1324	XM_357315.1
ILMN_219309	Sirt5	8.16e-12	2.9366	NM_178848.3
ILMN_211726	Slc2a6	8.26e-12	-3.44303	NM_172659.2
ILMN_221419	Gdf15	8.95e-12	3.24905	NM_011819.1
ILMN_194582	Lpin1	9.62e-12	2.13715	NM_015763
ILMN_217044	Gja5	9.62e-12	-4.18232	NM_008121.2
ILMN_214733	Tmem184a	1.09e-11	-2.2822	NM_144914.2
ILMN_222302	2310003L22Rik	1.2e-11	3.01807	NM_027093.3
ILMN_218432	Slc25a12	1.26e-11	4.00075	NM_172436.2
ILMN_210229	Car2	1.27e-11	3.63587	NM_009801.3
ILMN_214221	Tmem86a	1.35e-11	3.03124	NM_026436.3
ILMN_249502	Mrpl47	1.62e-11	2.96863	NM_029017.1
ILMN_239129	Coq9	2.04e-11	2.72871	NM_026452.2
ILMN_213403	Retsat	2.12e-11	3.41484	NM_026159.4
ILMN_201556	Rangrf	2.14e-11	3.18549	NM_021329.2
ILMN_208730	Brp44	2.44e-11	3.16959	NM_027430.1
ILMN_216641	Timm10	2.54e-11	2.51258	NM_013899.1
ILMN_231065	Ndufb6	2.61e-11	2.10607	NM_001033305.2
ILMN_240635	Ddo	2.81e-11	2.24247	NM_027442.4
ILMN_211983	Fgfrl1	2.82e-11	-3.1307	NM_054071.1
ILMN_259234	1300001I01Rik	2.89e-11	3.88436	NM_001081158.2
ILMN_218297	Aadacl1	2.93e-11	2.90157	NM_178772.2
ILMN_217236	1810049H13Rik	2.96e-11	1.92826	NM_025560.2
ILMN_219645	Ndufs8	3.17e-11	2.07357	NM_144870.4
ILMN_214872	Ddit3	3.24e-11	3.51392	NM_007837.2
ILMN_210692	Dnaja3	3.3e-11	2.17447	NM_023646.3
ILMN_213892	Fastkd1	3.37e-11	2.96495	NM_177244.3
ILMN_215827	Alas1	3.5e-11	2.57755	NM_020559.1
ILMN_229771	Tm6sf1	3.63e-11	2.43276	NM_145375.1
ILMN_220920	Calr3	3.7e-11	2.54682	NM_029782.3
ILMN_209615	Pcyt2	3.93e-11	2.59746	NM_024229.2
ILMN_216000	Atp5sl	3.93e-11	2.32694	NM_025504.4
ILMN_210061	Plcg2	3.97e-11	-1.93801	NM_172285.1
ILMN_241732	Tceal5	4.18e-11	-2.59525	NM_177919.1
ILMN_213918	Lace1	4.2e-11	2.47654	NM_145743.2
ILMN_250560	Ciapin1	4.25e-11	3.15393	NM_134141.4
ILMN_215033	Rtn4ip1	4.32e-11	2.82273	NM_130892.2
ILMN_208782	Nqo2	4.33e-11	1.98464	NM_020282.2
ILMN_222252	Nudt19	4.47e-11	2.92056	NM_033080.2
ILMN_217542	Srpk3	4.54e-11	-3.87951	NM_019684.1
ILMN_220888	Rcan2	4.64e-11	2.15214	NM_207649.1
ILMN_239767	Itgb1bp3	4.92e-11	3.40102	NM_027120.2
ILMN_213266	Guca2a	4.99e-11	3.0513	NM_008190.1
ILMN_212349	Trak2	5.13e-11	2.11675	NM_172406.2
ILMN_212893	Twf2	5.62e-11	3.37313	NM_011876.3
ILMN_223230	1700021F05Rik	5.68e-11	2.56022	NM_026411.1
ILMN_212206	1110001J03Rik	5.88e-11	3.4523	NM_025363.2
ILMN_240032	Wipf3	6.5e-11	2.67131	XM_620310.4
ILMN_188938	Dlst	6.62e-11	2.59719	NM_030225
ILMN_229399	Eif1ad	6.72e-11	2.29662	NM_027236.2
ILMN_214234	Aldh3b1	6.96e-11	-2.41482	NM_026316.2
ILMN_249926	1700008I05Rik	6.97e-11	-2.25021	NM_027952.2
ILMN_212298	Pcolce	7.27e-11	2.4144	NM_008788.2
ILMN_223586	Mfsd7a	7.38e-11	-2.92114	NM_172883.2
ILMN_211491	Gpha2	8.1e-11	-1.87134	NM_130453.2
ILMN_244170	EG433923	8.89e-11	2.31514	NM_001081233.1
ILMN_217880	Ndufs7	9.17e-11	2.45964	NM_029272.3
ILMN_211291	Serhl	9.22e-11	2.82986	NM_023475.2
ILMN_258011	EG433224	9.29e-11	2.58692	NR_002891.1
ILMN_248084	Ndufa11	9.35e-11	2.78401	XM_924988.3
ILMN_209876	Slc25a11	9.38e-11	2.49577	NM_024211.2
ILMN_209086	Sdhb	9.79e-11	3.22247	NM_023374.3
ILMN_185100	1500017E21Rik	9.91e-11	-1.68747
ILMN_199766	LOC382972	1.04e-10	-2.76891	XM_356781.1
ILMN_220690	Atp5d	1.07e-10	1.94042	NM_025313.1
ILMN_216961	Drg2	1.1e-10	1.76258	NM_021354.1
ILMN_247252	Cox5a	1.1e-10	2.18598	NM_007747.2
ILMN_201844	Mrpl15	1.16e-10	2.36332	AK017804
ILMN_260273	B230339M05Rik	1.2e-10	1.55096	NM_177658.3
ILMN_234975	Akap1	1.22e-10	2.29621	NM_001042541.1
ILMN_209571	BC025446	1.23e-10	-3.10909	NM_146058.1
ILMN_192993	Txn2	1.25e-10	2.20417	NM_019913.5
ILMN_213068	Cox10	1.25e-10	2.53889	NM_178379.2
ILMN_234136	Mcee	1.34e-10	2.63552	NM_028626.1
ILMN_219674	Lcn2	1.39e-10	4.61457	NM_008491.1
ILMN_238591	Dysfip1	1.4e-10	-1.63326	NM_026814.3
ILMN_186391	Uqcrc2	1.4e-10	2.1641	NM_025899.2
ILMN_255003	Lonp1	1.42e-10	2.67536	NM_028782.2
ILMN_255382	Ndufb8	1.43e-10	1.92973	NM_026061.2
ILMN_209646	0610042C05Rik	1.52e-10	2.54621	NM_025343.2
ILMN_189570	Tufm	1.56e-10	2.1879	NM_172745.2
ILMN_211596	Chac1	1.56e-10	1.9092	NM_026929.3
ILMN_221393	Mrpl37	1.71e-10	1.66696	NM_025500.1
ILMN_219251	Cisd1	1.79e-10	1.76429	NM_134007.4
ILMN_252778	Mrps18b	1.81e-10	1.99585	NM_025878.1
ILMN_211735	Coq6	1.84e-10	2.12992	NM_172582.2
ILMN_220521	Mrps31	1.85e-10	1.7977	NM_020560.1
ILMN_258819	Hsd3b7	1.88e-10	-1.61474	NM_133943.2
ILMN_237838	Ndufv2	2.02e-10	2.08621	NM_028388.1
ILMN_210141	Flad1	2.06e-10	2.19046	NM_177041.3
ILMN_185384	Extl1	2.09e-10	2.34578	NM_019578
ILMN_237160	Got2	2.13e-10	1.90301	NM_010325.2
ILMN_218915	S100a13	2.16e-10	2.64992	NM_009113.3
ILMN_229854	Cnih4	2.22e-10	2.00097	NM_030131.2
ILMN_216493	Cpt1b	2.22e-10	3.77187	NM_009948.1
ILMN_223502	Oma1	2.41e-10	1.69016	NM_025909.3
ILMN_221050	Mif4gd	2.46e-10	2.1572	NM_027162.3
ILMN_213228	Il17re	2.49e-10	1.50051	NM_145826.4
ILMN_218991	Osbpl1a	2.51e-10	3.04936	NM_020573.1
ILMN_217468	Gdpd1	2.52e-10	1.77937	NM_025638.1
ILMN_209496	D2Wsu81e	2.54e-10	1.95918	NM_172660.2
ILMN_188171	Vegfb	2.6e-10	2.94837	NM_011697.2
ILMN_233456	Tmem201	2.81e-10	1.67111	NM_001025106.1
ILMN_216202	1110008P14Rik	2.86e-10	2.63289	NM_198001.1
ILMN_187524	2600009P04Rik	2.88e-10	1.52792
ILMN_223224	Slc25a33	2.91e-10	1.90296	NM_027460.2
ILMN_188221	Tnfrsf19	2.94e-10	-1.72813	NM_013869.3
ILMN_200109	LOC384206	2.98e-10	1.86045	XM_357488.1
ILMN_196910	LOC271697	3e-10	2.39071	XM_194683.2
ILMN_226277	Glrx5	3.12e-10	2.0009	NM_028419.2
ILMN_216328	Etfdh	3.33e-10	2.83536	NM_025794.1
ILMN_212569	Etfb	3.33e-10	2.20272	NM_026695.2
ILMN_249685	Gm166	3.46e-10	1.72015	NM_001033040.2
ILMN_196712	Klk1b26	3.49e-10	1.69739	NM_010644.1
ILMN_218088	Ndufa5	3.56e-10	2.02895	NM_026614.2
ILMN_316341	LOC626152	3.57e-10	2.25811	XR_032670.1
ILMN_209371	Slc44a4	3.87e-10	-3.01556	NM_023557.2
ILMN_245093	Agrp	3.98e-10	4.90324	NM_007427.2
ILMN_187328	scl0002069.1_48	4e-10	2.29109	AF317223.1
ILMN_260058	Rsad1	4.02e-10	2.99554	NM_001013381.1
ILMN_221565	Cidea	4.08e-10	1.94676	NM_007702.1
ILMN_222340	Tesc	4.43e-10	2.90705	NM_021344.2
ILMN_209646	Rmnd1	4.44e-10	2.54218	NM_025343.3
ILMN_211493	Cox6b1	4.55e-10	1.92657	NM_025628.2
ILMN_218368	Reep1	4.63e-10	-2.15768	NM_178608.2
ILMN_196566	Atpaf2	4.71e-10	2.05393	NM_145427.1
ILMN_209676	Sdhd	5.08e-10	3.40994	NM_025848.2
ILMN_213948	Pvalb	5.2e-10	2.57362	NM_013645.3
ILMN_210959	Pmm1	5.48e-10	2.40038	NM_013872.2
ILMN_242863	Fh1	6.12e-10	2.66094	NM_010209.1
ILMN_319923	LOC100047762	6.13e-10	4.33089	XM_001478835.1
ILMN_219921	Rnmtl1	6.36e-10	2.39	NM_183263.3
ILMN_315139	LOC100044257	6.36e-10	-2.24882	XM_001471785.1
ILMN_217710	Mkks	6.5e-10	2.15917	NM_021527.1
ILMN_208757	Timm44	6.79e-10	2.43171	NM_011592.1
ILMN_235226	Stk36	7.19e-10	-1.6593	NM_175031.3
ILMN_215368	Acsf3	7.22e-10	1.74166	NM_144932.3
ILMN_194482	AV028368	7.3e-10	1.55339	NM_177672
ILMN_207558	Tubb2b	7.61e-10	-1.67975	NM_023716.2
ILMN_209313	Gfm1	7.76e-10	2.63419	NM_138591.1
ILMN_249623	Slc25a34	7.79e-10	2.13713	NM_001013780.1
ILMN_215419	Foxred1	8.17e-10	2.10696	NM_172291.1
ILMN_218286	Slc25a39	8.27e-10	2.23087	NM_026542.1
ILMN_223596	Mdh2	8.36e-10	2.60338	NM_008617.2
ILMN_196457	Aim1l	8.38e-10	2.53155	XM_131754.7
ILMN_201570	Padi2	8.9e-10	-1.84781	NM_008812.1
ILMN_203138	Slc37a1	8.99e-10	1.96746	AK028984
ILMN_211496	Letm1	9.1e-10	2.45338	NM_019694.1
ILMN_196722	Hist1h4f	9.15e-10	-1.92052	NM_175655.1
ILMN_213301	Art5	9.24e-10	1.7253	NM_007491.1
ILMN_218238	Alkbh7	9.26e-10	2.64898	NM_025538.2
ILMN_210415	Cox6a1	9.28e-10	1.90411	NM_007748.2
ILMN_260135	Mast4	9.6e-10	-1.61028	XM_915307.3
ILMN_223392	Ntan1	9.63e-10	1.72275	NM_010946.2
ILMN_206359	C430015A10Rik	9.8e-10	1.9061	AK082906
ILMN_210961	Acads	9.86e-10	1.91441	NM_007383.2
ILMN_310888	LOC100041835	1.02e-09	2.318	XM_001478119.1
ILMN_214676	Clic3	1.06e-09	-2.31252	NM_027085.3
ILMN_222263	Pank1	1.09e-09	3.20702	NM_023792.1
ILMN_217737	Fam129b	1.09e-09	-1.73971	NM_146119.1
ILMN_217208	Isca1	1.13e-09	2.28519	NM_026921.2
ILMN_211122	Coq5	1.13e-09	3.95895	NM_026504.1
ILMN_256175	EG545758	1.16e-09	1.59716	NM_001024147.1
ILMN_213592	Csrnp2	1.27e-09	-1.90865	NM_153407.2
ILMN_220526	1110002N22Rik	1.27e-09	2.00994	NM_183275.1
ILMN_226965	Sgk3	1.27e-09	2.44153	NM_133220.2
ILMN_208975	Cecr5	1.32e-09	1.91422	NM_144815.2
ILMN_248292	LOC638935	1.37e-09	-2.80602	XM_915139.3
ILMN_215692	E2f2	1.4e-09	-2.30338	NM_177733.2
ILMN_213260	Gsto1	1.42e-09	1.86932	NM_010362.2
ILMN_209476	Hibadh	1.42e-09	1.83318	NM_145567.1
ILMN_209684	Mrpl43	1.44e-09	1.97822	NM_053164.3
ILMN_225556	Alkbh3	1.46e-09	1.73247	NM_026944.1
ILMN_187510	Upp1	1.5e-09	3.15979	NM_009477.1
ILMN_213852	Idh3g	1.57e-09	1.69963	NM_008323.1
ILMN_218979	Ndufv1	1.6e-09	1.68187	NM_133666.2
ILMN_213954	Pdlim3	1.71e-09	-2.60383	NM_016798.3
ILMN_210469	Stmn2	1.75e-09	-2.16511	NM_025285.2
ILMN_218315	Lxn	1.76e-09	-1.8931	NM_016753.4
ILMN_259302	Coq10a	1.78e-09	2.27408	NM_001081040.1
ILMN_215181	Adck1	1.79e-09	1.95382	NM_028105.3
ILMN_223361	Fndc5	1.92e-09	2.00397	NM_027402
ILMN_223570	Timm8a1	1.94e-09	3.31855	NM_013898.1
ILMN_237906	Vdac1	1.96e-09	1.77014	NM_011694.3
ILMN_217622	Tymp	1.97e-09	2.13268	NM_138302.1
ILMN_218399	Mrps35	1.97e-09	3.16772	NM_145573.2
ILMN_211039	Casp1	2.02e-09	-1.77914	NM_009807.2
ILMN_256242	Hspa2	2.04e-09	-1.90703	NM_001002012.1
ILMN_255544	Tbcd	2.16e-09	-1.64346	NM_029878.1
ILMN_222071	Mrpl34	2.21e-09	2.3863	NM_053162.2
ILMN_211469	Letmd1	2.32e-09	2.10078	NM_134093.1
ILMN_245190	Ndufa10	2.33e-09	1.88394	NM_024197.1
ILMN_211054	4930477M19	2.38e-09	-1.50967	NM_177729.2
ILMN_217355	Lrrc26	2.49e-09	-1.55062	NM_146117.1
ILMN_197796	Fbxo10	2.61e-09	-1.68967	XM_194139.6
ILMN_202711	0610007J10Rik	2.66e-09	2.51824	AK018717
ILMN_222338	Hspb3	2.69e-09	-2.15647	NM_019960.1
ILMN_223487	Actn2	2.77e-09	2.41624	NM_033268.3
ILMN_217868	Pptc7	2.81e-09	3.39173	NM_177242.4
ILMN_209991	Abcd1	2.82e-09	2.11877	NM_007435.1
ILMN_244624	Mrps5	2.83e-09	2.36696	NM_029963.2
ILMN_216322	BC065085	3.15e-09	-1.99745	NM_177628.3
ILMN_184501	Chrng	3.28e-09	-2.74449	NM_009604
ILMN_208811	Htr2b	3.32e-09	-1.62924	NM_008311.2
ILMN_239992	1110007M04Rik	3.33e-09	2.91991	NM_026742.3
ILMN_208825	Tbrg4	3.46e-09	2.12709	NM_134011.1
ILMN_195919	scl0002124.1_39	3.5e-09	2.30213
ILMN_221369	Hagh	3.56e-09	3.18118	NM_024284.1
ILMN_234204	LOC676724	3.75e-09	1.81531	XM_992449.1
ILMN_198399	LOC225897	3.78e-09	1.79894	XM_148897.3
ILMN_213110	BC004728	3.84e-09	1.65588	NM_174992.2
ILMN_220871	D10Ertd322e	3.9e-09	1.92508	NM_026065.2
ILMN_196228	Trio	4.01e-09	-1.75121
ILMN_188309	Trmu	4.05e-09	1.76009	NM_028063.2
ILMN_218121	Lyrm5	4.19e-09	1.82031	NM_133688.2
ILMN_256787	Abra	4.3e-09	2.34513	NM_175456.4
ILMN_187288	6720458D17Rik	4.39e-09	-1.96811
ILMN_215863	Zfp691	4.41e-09	1.79971	NM_183140.1
ILMN_190946	B230107K20Rik	4.42e-09	1.56639
ILMN_220901	Acy3	4.45e-09	4.91602	NM_027857.3
ILMN_220903	AI467606	4.71e-09	-1.84563	NM_178901.3
ILMN_213732	Tsfm	4.72e-09	2.15693	NM_025537.3
ILMN_318141	LOC100046918	4.85e-09	2.62943	XM_001477065.1
ILMN_216366	Fxn	4.86e-09	1.81068	NM_008044.1
ILMN_199227	LOC217328	4.94e-09	1.63947	XM_203357.3
ILMN_240427	Rhobtb1	5.02e-09	-1.90455	NM_001081347.1
ILMN_224727	Synpo2l	5.34e-09	-1.9049	NM_175132.3
ILMN_213671	Ptges2	5.67e-09	2.31273	NM_133783.1
ILMN_218734	Msrb2	5.72e-09	1.69184	NM_029619.2
ILMN_217533	1700034H14Rik	5.83e-09	1.67361	NM_025969.3
ILMN_185428	Tpm3	5.85e-09	4.46235	NM_022314.2
ILMN_210312	Them2	5.92e-09	2.51894	NM_025790.1
ILMN_310009	2310014G06Rik	6.02e-09	1.51026	NM_001082975.1
ILMN_231998	Dnajc28	6.05e-09	2.02305	NM_138664.2
ILMN_210437	Emp3	6.17e-09	-1.74965	NM_010129.1
ILMN_190858	Ttc19	6.17e-09	2.11433	NM_028360.2
ILMN_244327	Pex10	6.22e-09	1.56	NM_001042407.1
ILMN_209038	Mllt11	6.32e-09	-1.69134	NM_019914.3
ILMN_221823	Iscu	6.4e-09	1.64863	NM_025526.3
ILMN_210632	Agxt2l2	6.4e-09	1.64012	NM_028398.1
ILMN_211802	Mrps16	6.4e-09	2.10055	NM_025440.2
ILMN_257205	Ndufs3	6.86e-09	1.71026	NM_026688.2
ILMN_213586	Dhrs7	6.92e-09	1.7843	NM_025522.3
ILMN_216684	Smyd2	7.03e-09	1.6412	NM_026796.1
ILMN_318899	LOC100044087	7.11e-09	3.33118	XR_034194.1
ILMN_184505	Tuft1	7.15e-09	-1.93399	NM_011656.2
ILMN_328343	Asprv1	7.26e-09	-2.06879	NM_026414.2
ILMN_261748	Cabc1	7.32e-09	1.78102	NM_023341.2
ILMN_256951	8030451F13Rik	7.33e-09	2.04017	NM_175418.3
ILMN_223314	Mrps23	7.34e-09	1.80893	NM_024174.4
ILMN_238314	Vasn	7.45e-09	-1.68644	NM_139307.2
ILMN_193206	Ube2n	7.75e-09	-1.57291	NM_080560.3
ILMN_223171	Mrgprf	7.84e-09	-1.81524	NM_145379.2
ILMN_253687	Mreg	7.88e-09	2.38602	NM_001005423.1
ILMN_212461	Spsb4	7.88e-09	2.09816	NM_145134.2
ILMN_190343	Galt	8.05e-09	1.92519	NM_016658.2
ILMN_256266	Ndufb10	8.16e-09	2.64252	NM_026684.1
ILMN_233027	Mknk1	8.57e-09	1.73633	NM_021461.4
ILMN_220180	Ndufc2	8.71e-09	1.7274	NM_024220.1
ILMN_232017	Itga10	8.72e-09	-1.70526	NM_001081053.1
ILMN_211847	Dap3	8.74e-09	1.56615	NM_022994.2
ILMN_228304	Peo1	9.37e-09	2.44853	NM_153796.3
ILMN_236981	Oxnad1	9.41e-09	1.88848	NM_145460.1
ILMN_217480	Suclg1	9.61e-09	2.53992	NM_019879.2
ILMN_211231	Mgst2	9.67e-09	-1.85673	NM_174995.2
ILMN_215958	Pstpip1	9.81e-09	-2.01315	NM_011193.1
ILMN_232669	Abcc4	9.87e-09	1.73675	NM_001033336.2
ILMN_214618	Etfa	9.93e-09	2.05775	NM_145615.3
ILMN_212220	1700020C11Rik	1.03e-08	2.63039	NM_026443.4
ILMN_185749	Vgll2	1.06e-08	-1.59937	NM_153786.1
ILMN_208856	Mrpl55	1.08e-08	1.95529	NM_026035.1
ILMN_223114	D10Jhu81e	1.09e-08	2.08118	NM_138601.1
ILMN_229399	2010003J03Rik	1.11e-08	2.37452	NM_027236.1
ILMN_215027	Drp2	1.13e-08	-1.58294	NM_010078.2
ILMN_210981	Atp5j	1.14e-08	1.52372	NM_016755.2
ILMN_261989	Gpi1	1.17e-08	1.61476	NM_008155.2
ILMN_243863	2410131K14Rik	1.17e-08	1.68442	NM_001081236.1
ILMN_218091	8430408G22Rik	1.17e-08	-1.81717	NM_145980.1
ILMN_234915	Myl2	1.18e-08	2.24091	NM_010861.3
ILMN_210745	Hadhb	1.19e-08	1.8896	NM_145558.1
ILMN_195527	Ssr1	1.19e-08	-1.76202	NM_025965
ILMN_209265	Sdhc	1.22e-08	1.85547	NM_025321.2
ILMN_235198	Mef2c	1.22e-08	-2.07556	NM_025282.2
ILMN_186716	Slc5a5	1.23e-08	-1.93284	NM_053248
ILMN_197084	LOC227393	1.27e-08	1.84032	XM_129965.3
ILMN_209874	Mcpt8	1.28e-08	-2.21841	NM_008572.1
ILMN_209630	Pcdh1	1.3e-08	-1.60826	NM_029357.3
ILMN_214596	Ecsit	1.32e-08	2.19903	NM_012029.1
ILMN_220097	Atp5f1	1.34e-08	1.94792	NM_009725.3
ILMN_222004	Gnb5	1.35e-08	1.73381	NM_138719.3
ILMN_215905	Lrpprc	1.35e-08	2.24552	NM_028233.1
ILMN_240402	Zfp428	1.36e-08	1.91134	NM_146183.1
ILMN_212204	Dexi	1.37e-08	1.53338	NM_021428.4
ILMN_210344	B230317C12Rik	1.37e-08	1.88863	NM_019833.2
ILMN_238130	Tspan14	1.39e-08	-1.6547	NM_145928.1
ILMN_215656	Rab35	1.43e-08	1.56475	NM_198163.1
ILMN_226040	Mylk	1.48e-08	-2.2292	NM_139300.3
ILMN_223357	Eno2	1.48e-08	-1.63173	NM_013509.2
ILMN_217724	Hmox2	1.5e-08	2.03698	NM_010443.1
ILMN_216501	Cldn2	1.53e-08	-1.6475	NM_016675.3
ILMN_259055	Entpd5	1.61e-08	1.8035	NM_001026214.1
ILMN_220088	Ndufb7	1.62e-08	2.19778	NM_025843.3
ILMN_216950	Grpel1	1.63e-08	1.99359	NM_024478.2
ILMN_212375	Fam171a2	1.65e-08	-1.96027	NM_199200.2
ILMN_217499	Gpt1	1.68e-08	1.74923	NM_182805.1
ILMN_232240	EG330503	1.72e-08	1.74897	NM_001033540.1
ILMN_202649	E430039I23Rik	1.72e-08	2.1075	AK089103
ILMN_217684	Sult2b1	1.74e-08	-1.50768	NM_017465.1
ILMN_211789	Dgat2	1.78e-08	1.58104	NM_026384.3
ILMN_231393	Hk1	1.79e-08	2.54121	NM_010438.2
ILMN_325302	LOC100046395	1.79e-08	1.74813	XR_032392.1
ILMN_211628	Ppp3cc	1.81e-08	1.77027	NM_008915.2
ILMN_215573	Scml4	1.81e-08	-2.18637	NM_172938.2
ILMN_211435	Ctsf	1.82e-08	2.09145	NM_019861.1
ILMN_221928	Mrpl30	1.83e-08	2.14927	NM_027098.2
ILMN_219887	Tas1r2	1.83e-08	-1.56013	NM_031873.1
ILMN_210631	Rnf11	1.83e-08	-1.56689	NM_013876.3
ILMN_210198	Tfam	1.89e-08	1.92423	NM_009360.4
ILMN_192504	Cox5b	1.91e-08	1.65386	NM_009942
ILMN_210674	Hes6	1.92e-08	-2.18705	NM_019479.2
ILMN_185646	5031439G07Rik	1.93e-08	1.73172	XM_128281
ILMN_249971	Timm9	1.93e-08	1.96682	NM_013896.3
ILMN_216005	Hemk1	2e-08	1.61798	NM_133984.1
ILMN_229700	Gm561	2.01e-08	1.63927	NM_001033297.2
ILMN_217384	Osbpl2	2.09e-08	1.63797	NM_144500.3
ILMN_194142	1110011C06Rik	2.1e-08	1.53218
ILMN_221336	Slc6a17	2.13e-08	2.08112	NM_172271.2
ILMN_224724	Prdx5	2.16e-08	1.91039	NM_012021.2
ILMN_210633	9430029K10Rik	2.18e-08	1.84576	XM_284281.2
ILMN_214139	Fastk	2.22e-08	2.32093	NM_023229.2
ILMN_243883	Atp5h	2.22e-08	2.01028	NM_027862.1
ILMN_218232	2310005N03Rik	2.23e-08	2.49027	NM_025511.2
ILMN_222359	Cox11	2.26e-08	2.21542	NM_199008.2
ILMN_210008	Ptcd2	2.26e-08	2.14615	XM_127497.2
ILMN_215455	Chchd7	2.29e-08	2.32959	NM_181391.2
ILMN_201861	Gfm	2.32e-08	2.11063	AK018125
ILMN_255959	Palld	2.35e-08	-1.84824	XM_974900.1
ILMN_215350	Mustn1	2.37e-08	-2.01918	NM_181390.1
ILMN_219332	Fgf13	2.41e-08	-2.01462	NM_010200.2
ILMN_215036	Ak3	2.45e-08	1.95613	NM_021299.1
ILMN_211707	Supv3l1	2.46e-08	1.84869	NM_181423.2
ILMN_220225	Dusp13	2.47e-08	-1.56781	NM_013849.3
ILMN_212355	Zfp672	2.47e-08	1.85095	NM_178761.3
ILMN_218890	Ncaph2	2.48e-08	-1.50832	NM_025795.2
ILMN_211164	D030070L09Rik	2.68e-08	-1.5279	NM_172625.1
ILMN_249105	Clip4	2.69e-08	1.81959	NM_030179.2
ILMN_219051	Stac2	2.69e-08	2.06042	NM_146028.4
ILMN_213701	Arl6ip5	2.72e-08	-1.59444	NM_022992.2
ILMN_201718	2400010C15Rik	2.72e-08	2.01873	AK010307
ILMN_233313	Klhl30	2.74e-08	-1.98733	NM_027551.2
ILMN_213159	Gde1	2.74e-08	1.73027	NM_019580.4
ILMN_216697	Gldc	2.74e-08	-1.76464	NM_138595.1
ILMN_223119	Myoz2	2.96e-08	-2.23982	NM_021503.1
ILMN_209457	Scx	2.98e-08	-1.86999	NM_198885.2
ILMN_251192	Tbc1d1	2.99e-08	-1.54408	NM_019636.2
ILMN_217096	Dctn2	3.03e-08	-2.32393	NM_027151.1
ILMN_198993	LOC380630	3.05e-08	1.67559	XM_354534.1
ILMN_215549	2310002L09Rik	3.05e-08	1.68728	NM_027104.2
ILMN_216283	2310009E04Rik	3.05e-08	-1.83741	XM_131496.4
ILMN_224873	Bdh1	3.06e-08	2.30554	NM_175177.3
ILMN_240997	5033413D22Rik	3.06e-08	-1.566	NM_029493.2
ILMN_219129	Dph3	3.1e-08	1.76986	NM_172254.3
ILMN_221825	Mrpl46	3.12e-08	1.95548	NM_023331.2
ILMN_209224	1190002H23Rik	3.16e-08	2.63633	NM_025427.2
ILMN_213371	1110020P15Rik	3.18e-08	1.6156	NM_197979.2
ILMN_217516	Ccdc134	3.2e-08	-1.94282	NM_172428.2
ILMN_214645	Sod2	3.22e-08	2.14635	NM_013671.2
ILMN_188502	Abhd11	3.44e-08	1.97808	NM_145215.1
ILMN_239986	Aifm2	3.47e-08	1.52463	NM_001039194.2
ILMN_251763	Porcn	3.51e-08	-1.89091	NM_145908.1
ILMN_228380	Oxa1l	3.52e-08	2.00208	NM_026936.3
ILMN_236550	Gm484	3.55e-08	-2.15263	NM_001033356.2
ILMN_217371	Dtx2	3.63e-08	-1.51826	NM_023742.1
ILMN_209922	1810014F10Rik	3.69e-08	2.45359	NM_026928.2
ILMN_202714	3000003G13Rik	3.79e-08	1.68346	AK019042
ILMN_208650	Mrps27	3.85e-08	2.03105	NM_173757.3
ILMN_223233	Cyp2d22	4.07e-08	1.5968	NM_019823.3
ILMN_217677	Hisppd2a	4.07e-08	1.65133	NM_178795.3
ILMN_215421	Gprc5c	4.13e-08	-1.96511	NM_147217.2
ILMN_249693	Megf10	4.14e-08	-1.82014	NM_001001979.1
ILMN_240483	Uap1l1	4.36e-08	-1.89214	NM_001033293.2
ILMN_226248	Pdss2	4.43e-08	1.93111	XM_988312.1
ILMN_213534	Atp2a3	4.46e-08	2.30081	NM_016745.2
ILMN_222789	Ndufa6	4.48e-08	1.92603	NM_025987.1
ILMN_227594	Peg3	4.58e-08	-2.0641	NM_008817.2
ILMN_210732	Grsf1	4.74e-08	2.03929	NM_178700.4
ILMN_224215	Gyk	4.82e-08	1.69825	NM_008194
ILMN_221765	Mapt	4.85e-08	-2.21275	NM_010838.2
ILMN_225621	Agl	4.93e-08	1.68049	NM_001081326.1
ILMN_213625	Hmgn2	4.94e-08	-1.54462	NM_016957.3
ILMN_214878	Deb1	5.11e-08	2.04464	NM_026794.2
ILMN_213562	Prdx2	5.11e-08	1.64196	NM_011563.2
ILMN_218793	Lynx1	5.13e-08	1.71636	NM_011838.4
ILMN_194471	Zadh2	5.16e-08	2.01943	NM_146090.4
ILMN_241583	Aldh4a1	5.23e-08	1.66925	NM_175438.3
ILMN_190282	Prkag3	5.37e-08	-2.22696	NM_153744
ILMN_195635	Tssc6	5.41e-08	-1.6078	AY039000
ILMN_251186	Sh3bp2	5.5e-08	-1.6815	NM_011893.2
ILMN_210747	5730403B10Rik	5.52e-08	1.82787	NM_025670.4
ILMN_212744	Hspa9	5.56e-08	1.94659	NM_010481.1
ILMN_238823	Klc4	5.59e-08	1.76919	NM_029091.2
ILMN_195697	4930402E16Rik	5.65e-08	1.92468	NM_198308
ILMN_201857	6330404C01Rik	5.7e-08	-1.92037	AK018112
ILMN_217035	Tmem70	5.89e-08	1.7924	NM_027415.2
ILMN_234856	Camk2n2	6.03e-08	-1.61218	XM_990809.1
ILMN_247046	Afg3l2	6.04e-08	2.41354	NM_027130.1
ILMN_220660	Ptgis	6.08e-08	-2.06718	NM_008968.3
ILMN_186441	scl0001978.1_6	6.09e-08	1.76109	AK050665.1
ILMN_215793	Trmt2b	6.16e-08	1.95786	NM_172540.1
ILMN_189339	A930009M04Rik	6.3e-08	1.63013	NM_177266
ILMN_219798	Syt12	6.32e-08	-1.63874	NM_134164.4
ILMN_256858	Akirin1	6.43e-08	-1.55367	NM_023423.3
ILMN_211589	Ndufa12	6.48e-08	1.84338	NM_025551.3
ILMN_261458	Sars	6.5e-08	1.72976	NM_011319.2
ILMN_211374	L2hgdh	6.58e-08	1.93123	NM_145443.1
ILMN_242680	Cox7b	6.83e-08	2.28876	NM_025379.2
ILMN_223221	Crabp2	6.84e-08	-1.67832	NM_007759.2
ILMN_222077	Fst	6.91e-08	-2.37663	NM_008046.2
ILMN_209408	Lig1	6.96e-08	-1.6707	NM_010715.2
ILMN_212931	Arfrp1	6.96e-08	1.72786	NM_029702.3
ILMN_211651	Socs3	6.96e-08	-1.50647	NM_007707.2
ILMN_210026	A130092J06Rik	7.04e-08	1.6805	NM_175511.4
ILMN_226244	Fars2	7.15e-08	1.65176	NM_001039189.1
ILMN_214391	Smpd1	7.2e-08	1.81048	NM_011421.1
ILMN_212420	Rrad	7.25e-08	-1.82749	NM_019662.1
ILMN_210767	Rpn2	7.34e-08	-1.55202	NM_019642.3
ILMN_248835	Ctsa	7.44e-08	-2.22752	NM_001038492.1
ILMN_210915	Spr	7.55e-08	1.67631	NM_011467.1
ILMN_213071	Atp5a1	7.71e-08	2.84889	NM_007505.2
ILMN_221305	Cox7a2	7.72e-08	1.96053	NM_009945.3
ILMN_222536	Slc25a3	8.01e-08	2.54833	NM_133668.2
ILMN_219447	Zfand2a	8.02e-08	-1.95859	NM_133349.2
ILMN_191185	Ptgr2	8.1e-08	1.86113	NM_029880.2
ILMN_215483	Slc25a5	8.15e-08	1.61287	NM_007451.3
ILMN_220969	Coq7	8.24e-08	2.36222	NM_009940.2
ILMN_209035	Pmm2	8.26e-08	1.5897	XM_147219.1
ILMN_214564	Ndufa3	8.26e-08	1.50681	NM_025348
ILMN_189909	Adsl	8.32e-08	2.05519	NM_009634
ILMN_208984	Ndufc1	8.38e-08	1.7727	NM_025523.1
ILMN_260694	Slco3a1	8.45e-08	-1.66894	NM_023908.2
ILMN_253782	Ahnak	8.6e-08	-1.64004	NM_001039959.1
ILMN_224061	Gm169	8.68e-08	1.58902	NM_199301
ILMN_236727	Tmem158	9.36e-08	-1.88158	NM_001002267.2
ILMN_242574	Ndufs6	9.4e-08	1.79433	NM_010888.1
ILMN_322147	LOC100048845	9.54e-08	-1.82222	XM_001479169.1
ILMN_245521	Dlgap4	9.83e-08	-1.56209	NM_001042487.1
ILMN_220067	Sdf2	9.85e-08	-1.5258	NM_009143.2
ILMN_196518	AI448196	1.01e-07	-1.77078	XM_136041.3
ILMN_189146	Tubb5	1.04e-07	-1.73309	NM_011655.4
ILMN_253408	AI847670	1.04e-07	1.67366	NM_177869.3
ILMN_246646	Syradb	1.04e-07	2.23085	NM_172656.5
ILMN_213835	Mfn2	1.08e-07	1.63433	NM_133201.2
ILMN_216454	Fam116b	1.08e-07	1.85269	NM_027081.3
ILMN_218177	Tgm2	1.08e-07	-1.73634	NM_009373.3
ILMN_219323	Slc44a1	1.09e-07	-1.56509	NM_133891.2
ILMN_242057	Clpp	1.1e-07	1.50335	NM_017393.1
ILMN_184461	2200002D01Rik	1.15e-07	-1.57398
ILMN_229741	Atp5c1	1.15e-07	3.03925	NM_020615.3
ILMN_242974	LOC627985	1.17e-07	-1.65336	XM_905813.3
ILMN_223175	BC003965	1.17e-07	1.59098	XM_128528.2
ILMN_221979	Slc4a8	1.18e-07	1.8787	NM_021530.2
ILMN_209531	Ndufs2	1.19e-07	1.79038	NM_153064.4
ILMN_225105	Hint2	1.21e-07	1.55131	NM_026871.1
ILMN_250060	Pdia6	1.22e-07	-1.60089	NM_027959.3
ILMN_228976	Myh3	1.24e-07	-2.05295	XM_908146.3
ILMN_215712	Neu2	1.26e-07	-1.52578	NM_015750.2
ILMN_208930	Abcb8	1.27e-07	1.6199	NM_029020.2
ILMN_202718	0610010I05Rik	1.28e-07	1.68255	AK018737
ILMN_220773	1110059M19Rik	1.29e-07	-1.58572	XM_135842.2
ILMN_219676	Cnnm2	1.29e-07	-1.5798	NM_033569.2
ILMN_196931	LOC277856	1.29e-07	1.70395	XM_204210.2
ILMN_210159	2310016M24Rik	1.3e-07	1.54807	NM_183256.2
ILMN_210459	Egln3	1.3e-07	-2.0637	NM_028133.1
ILMN_219656	Mrps30	1.31e-07	1.78511	NM_021556.3
ILMN_218965	Adk	1.31e-07	1.59724	NM_134079.1
ILMN_220691	Cd9	1.32e-07	-1.67731	NM_007657.2
ILMN_209500	Grasp	1.32e-07	-1.53275	NM_019518.2
ILMN_219020	2310061C15Rik	1.32e-07	2.10212	NM_026844.3
ILMN_211293	Eif4e3	1.34e-07	1.89132	NM_025829.2
ILMN_248452	Ankrd50	1.36e-07	-1.72964	NM_001033198.2
ILMN_214268	Phb2	1.36e-07	2.14657	NM_007531.2
ILMN_220846	Gpt2	1.37e-07	1.67375	NM_173866.3
ILMN_189011	Trp53inp2	1.4e-07	2.08257	NM_178111.3
ILMN_218536	Idh3b	1.4e-07	1.77078	NM_130884.3
ILMN_223781	Pygm	1.41e-07	2.09043	NM_011224.1
ILMN_212004	Gpr20	1.45e-07	-1.79028	NM_173365.2
ILMN_211202	Lass5	1.48e-07	-1.66242	NM_028015.2
ILMN_221714	Prickle3	1.48e-07	-1.96101	NM_175097.3
ILMN_211617	Pdlim2	1.49e-07	-1.5652	NM_145978.1
ILMN_245215	Rftn2	1.51e-07	-1.71066	NM_028713.1
ILMN_210685	Tmem143	1.58e-07	1.58355	NM_144801.1
ILMN_184823	Acacb	1.6e-07	1.86285	NM_133904
ILMN_247810	EG627624	1.62e-07	-1.65362	XM_894499.3
ILMN_249397	Limch1	1.63e-07	-1.5569	NM_001001980.2
ILMN_244158	Acsl6	1.66e-07	-1.61491	NM_001033597.1
ILMN_218083	Bcs1l	1.66e-07	1.65495	NM_025784.2
ILMN_228685	LOC676640	1.69e-07	-1.5319	XM_001003712.1
ILMN_243961	Vamp1	1.72e-07	1.8348	NM_001080557.1
ILMN_210911	Serpinb9g	1.74e-07	-2.16055	NM_011455.2
ILMN_230609	Cpt2	1.81e-07	1.52237	NM_009949.1
ILMN_245760	Mthfd2	1.82e-07	1.616	NM_008638.1
ILMN_185047	A930008A22Rik	1.82e-07	1.69625	NM_172768
ILMN_199362	Mrpl9	1.83e-07	1.58146	NM_030116.2
ILMN_254698	Acaa2	1.87e-07	1.67886	NM_177470.2
ILMN_190885	Arfgef2	1.87e-07	1.52584	XM_130646
ILMN_216364	Nat5	1.88e-07	1.76616	NM_026425.1
ILMN_210833	Mrps25	1.88e-07	1.71429	NM_025578.4
ILMN_217166	Pyy	1.92e-07	1.51665	NM_145435.1
ILMN_217171	Pdha1	1.96e-07	1.7995	NM_008810.2
ILMN_220488	Timm17a	1.97e-07	1.50817	NM_011590.2
ILMN_206357	D430022H17Rik	2.11e-07	1.56471	AK084998
ILMN_213240	Pdhb	2.14e-07	2.03592	NM_024221.3
ILMN_217682	Gas6	2.18e-07	1.86144	NM_019521.2
ILMN_210091	Dgat1	2.22e-07	1.70161	NM_010046.2
ILMN_220216	Echs1	2.22e-07	1.95064	NM_053119.1
ILMN_220613	0610009O20Rik	2.27e-07	1.78823	NM_024179.4
ILMN_236502	BC002163	2.29e-07	2.07921	NR_002445.2
ILMN_233633	EG623230	2.3e-07	1.67527	XM_887671.3
ILMN_250069	Zmynd17	2.31e-07	-2.15633	XM_907249.2
ILMN_212725	Cox6a2	2.32e-07	1.64479	NM_009943.2
ILMN_220295	Mrpl4	2.32e-07	2.38555	NM_023167.2
ILMN_204751	B930045J24Rik	2.38e-07	-1.65801	AK047284
ILMN_221894	P2rx5	2.42e-07	-1.6018	NM_033321.1
ILMN_315729	LOC100040525	2.43e-07	-1.55297	XR_031953.1
ILMN_214132	Bzw2	2.45e-07	1.61952	NM_025840.2
ILMN_214542	S100a1	2.47e-07	1.86439	NM_011309.3
ILMN_209839	Slc44a2	2.53e-07	-1.55279	NM_152808.2
ILMN_212171	Apbb1	2.55e-07	-2.05506	NM_009685.2
ILMN_188350	scl0003835.1_21	2.57e-07	-1.88972	AK010240.1
ILMN_217983	Slc27a1	2.57e-07	1.58949	NM_011977.2
ILMN_239396	Prmt2	2.65e-07	-1.57145	NM_001077638.1
ILMN_211763	Prnp	2.65e-07	-1.60072	NM_011170.1
ILMN_215664	Oplah	2.65e-07	1.79693	NM_153122.2
ILMN_210022	2410015M20Rik	2.67e-07	1.9009	NM_153152.3
ILMN_219470	Tas1r1	2.69e-07	-2.05388	NM_031867.1
ILMN_217133	1110058L19Rik	2.7e-07	1.79589	NM_026503.2
ILMN_223694	Ndufaf1	2.72e-07	1.79376	NM_027175.3
ILMN_240514	B3gntl1	2.86e-07	-1.7096	NM_178664.3
ILMN_247250	Sco1	2.86e-07	1.50212	NM_001040026.1
ILMN_214963	Tac4	2.88e-07	-1.60805	NM_053093.1
ILMN_212082	1700029P11Rik	2.88e-07	1.64826	NM_025503.1
ILMN_218675	Aifm1	2.89e-07	1.76675	NM_012019.2
ILMN_223819	Bok	2.96e-07	-1.82088	NM_016778
ILMN_242858	Hdc	3.04e-07	-1.56	NM_008230.4
ILMN_209329	Tha1	3.14e-07	1.57195	NM_027919.3
ILMN_222965	Gamt	3.17e-07	-1.69877	NM_010255.1
ILMN_220624	Anxa8	3.26e-07	-1.89545	NM_013473.2
ILMN_217220	1500019G21Rik	3.31e-07	1.53242	NM_024172.2
ILMN_184143	5530400B01Rik	3.44e-07	-1.60586
ILMN_212280	Chchd4	3.48e-07	1.74087	NM_133928.2
ILMN_245439	Cd44	3.54e-07	-1.93627	NM_001039150.1
ILMN_211950	Ethe1	3.59e-07	1.76395	NM_023154.3
ILMN_210134	Mgst3	3.61e-07	1.57661	NM_025569.1
ILMN_325877	Fer1l3	3.64e-07	-1.62375	XM_001480162.1
ILMN_212247	Use1	3.64e-07	-1.60164	NM_025917.3
ILMN_209736	Ptbp1	3.73e-07	-1.51966	NM_008956.1
ILMN_253862	Pgk1	3.79e-07	1.59069	NM_008828.2
ILMN_209827	Igh-6	3.8e-07	-1.72213	XM_354710.1
ILMN_213396	Mapk12	3.82e-07	-1.5829	NM_013871.2
ILMN_214398	Samd8	3.83e-07	-1.8411	NM_026283.2
ILMN_216896	Optn	3.86e-07	1.7506	NM_181848.3
ILMN_215649	Rap2ip	3.89e-07	-1.63209	NM_016759.1
ILMN_214706	Slc12a7	3.9e-07	2.13114	NM_011390.2
ILMN_210478	Rnf181	3.99e-07	-1.5066	NM_025607.3
ILMN_187890	scl000292.1_12	4.04e-07	1.93035	XM_127742.4
ILMN_214541	Myh8	4.04e-07	1.77876	NM_177369.3
ILMN_219595	Tmem38b	4.1e-07	-1.62777	NM_028053.1
ILMN_215528	Ghitm	4.11e-07	2.23623	NM_078478.3
ILMN_221948	Mrps2	4.17e-07	1.68544	NM_080452.2
ILMN_215291	Ndufa9	4.2e-07	1.78382	NM_025358.2
ILMN_215828	Mrpl38	4.29e-07	1.56235	NM_024177.3
ILMN_204223	Masp1	4.36e-07	1.64141	AK043055
ILMN_219398	Actn3	4.37e-07	-1.75599	NM_013456.1
ILMN_223373	Rnase1	4.45e-07	1.57645	NM_011271.2
ILMN_217006	Psmd8	4.5e-07	-1.52432	NM_026545.2
ILMN_219117	4930572J05Rik	4.54e-07	1.58992	NM_198607.1
ILMN_218529	Ppm1f	4.59e-07	-1.63945	NM_176833.3
ILMN_223571	5730472N09Rik	4.62e-07	1.60934	NM_175392.3
ILMN_250608	Dlg5	4.63e-07	-1.60354	XM_981375.2
ILMN_217502	Macrod1	4.68e-07	1.71853	NM_134147.3
ILMN_317292	LOC100047827	4.91e-07	-1.66367	XM_001479392.1
ILMN_209192	Inhba	4.97e-07	-1.56589	NM_008380.1
ILMN_190754	D030028O16Rik	5.05e-07	-1.58812	NM_145984
ILMN_220429	Eif2b4	5.12e-07	1.63915	NM_010122.1
ILMN_310393	LOC100048483	5.29e-07	1.69792	XM_001480453.1
ILMN_257708	Tsc22d3	5.62e-07	-1.54964	NM_001077364.1
ILMN_227461	Cnksr1	5.76e-07	-1.59412	NM_001081047.1
ILMN_214782	Osbpl3	5.83e-07	-1.60852	NM_027881.2
ILMN_215367	0610012G03Rik	5.85e-07	1.86299	NM_025320
ILMN_229631	Rap1gap	5.88e-07	1.62915	NM_001081155.1
ILMN_213652	Armcx2	6.09e-07	-1.54943	NM_026139.3
ILMN_218564	Atad3a	6.17e-07	1.67743	NM_179203.1
ILMN_212305	Pea15	6.3e-07	-1.78887	NM_008556.1
ILMN_251877	Tfb2m	6.35e-07	1.60535	NM_008249.2
ILMN_216644	Acss2	6.47e-07	1.78485	NM_019811.3
ILMN_220373	Msto1	6.6e-07	1.77871	NM_144898.1
ILMN_236930	Dync1i2	6.69e-07	-1.50262	NM_010064.3
ILMN_311466	LOC667609	6.7e-07	2.54179	XR_032582.1
ILMN_210171	Smpdl3b	6.74e-07	1.82074	NM_133888.2
ILMN_251885	Baiap2l1	6.84e-07	-1.65974	NM_025833.3
ILMN_210402	Ubqln4	6.9e-07	1.52791	NM_033526.2
ILMN_260376	Rps6ka1	6.92e-07	-2.09305	NM_009097.1
ILMN_215245	Anxa2	7.18e-07	-1.52866	NM_007585.3
ILMN_213341	Osbpl5	7.19e-07	-1.60159	NM_024289
ILMN_228289	Rnf5	7.29e-07	1.54443	NM_019403.3
ILMN_210506	Gch1	7.37e-07	1.6173	NM_008102.3
ILMN_254904	Erbb2	7.54e-07	-1.71349	NM_001003817.1
ILMN_191549	scl0002007.1_97	7.67e-07	1.72069
ILMN_209221	Spink4	7.72e-07	2.03491	NM_011463.1
ILMN_251058	Ak1	7.73e-07	2.00414	NM_021515.2
ILMN_216408	1110008F13Rik	7.82e-07	1.50889	NM_026124.2
ILMN_215302	Rhbdf1	7.9e-07	-1.50577	NM_010117.1
ILMN_217782	2410003P15Rik	7.91e-07	1.52063	NM_018888.1
ILMN_222933	Casq2	8.06e-07	-1.79448	NM_009814.1
ILMN_216925	Dhx38	8.1e-07	-1.50439	NM_178380.1
ILMN_242787	Il12a	8.1e-07	-1.59824	NM_008351.1
ILMN_310621	EG632248	8.3e-07	-1.57545	XM_001473902.1
ILMN_219873	Cyb561	8.31e-07	1.50504	NM_007805.4
ILMN_210676	Gpsm1	8.51e-07	-1.98323	NM_153410.4
ILMN_222871	Dnajc15	8.52e-07	1.75514	NM_025384.3
ILMN_225004	Gdf1	8.71e-07	-1.6829	NM_008107.3
ILMN_237558	Wwp1	8.86e-07	1.52148	NM_177327.3
ILMN_213608	Nol3	8.88e-07	-1.53101	NM_030152.4
ILMN_213449	Spsb2	9.12e-07	-1.51806	NM_013539.1
ILMN_222505	Tmem132a	9.32e-07	-1.82885	NM_133804.2
ILMN_216250	1500032D16Rik	9.34e-07	1.76526	NM_030087.1
ILMN_216711	Thop1	9.49e-07	-1.65928	NM_022653.3
ILMN_221193	Prdx3	9.52e-07	1.67263	NM_007452.1
ILMN_220697	Cnot6l	9.54e-07	-1.54978	NM_178854.3
ILMN_221810	Ndrg3	9.6e-07	1.73719	NM_013865.1
ILMN_213603	Slc25a26	9.65e-07	1.50827	NM_026255.4
ILMN_221602	Pdk2	9.73e-07	2.37513	NM_133667.1
ILMN_225883	Wtip	9.81e-07	-1.56421	NM_207212.2
ILMN_244791	Aes	1.01e-06	1.60856	NM_010347.2
ILMN_247154	Sort1	1.01e-06	-1.57266	NM_019972.2
ILMN_259192	Fads3	1.02e-06	-1.65816	NM_021890.3
ILMN_242087	Timp1	1.04e-06	-1.66705	NM_011593.2
ILMN_261854	5133401N09Rik	1.04e-06	1.70261	NM_198004.2
ILMN_245250	Hist1h2bm	1.04e-06	-1.53992	NM_178200.1
ILMN_211475	Pkig	1.05e-06	-1.71426	NM_011106.2
ILMN_216234	Immp2l	1.06e-06	1.59097	NM_053122.3
ILMN_213620	Hspd1	1.07e-06	1.76567	NM_010477.3
ILMN_234613	2610507B11Rik	1.07e-06	1.82669	NM_001002004.1
ILMN_215324	Acox2	1.07e-06	2.09071	NM_053115.1
ILMN_212686	Inpp4b	1.08e-06	-1.84342	XM_134427.3
ILMN_241010	Kctd1	1.09e-06	1.66377	NM_134112.4
ILMN_221706	Abhd5	1.14e-06	1.55173	NM_026179.2
ILMN_221784	Slc31a1	1.16e-06	1.56368	NM_175090.3
ILMN_209259	Prkx	1.17e-06	-1.7185	NM_016979.1
ILMN_212856	Slc10a4	1.19e-06	1.67328	NM_173403.2
ILMN_209901	Cox4i1	1.19e-06	1.8059	NM_009941.1
ILMN_185934	Xbp1	1.19e-06	-1.58396	NM_013842.2
ILMN_214036	Angptl6	1.21e-06	1.54813	NM_145154
ILMN_195057	mt-Nd4l	1.22e-06	2.29103
ILMN_238781	Glrx	1.24e-06	1.59872	NM_053108.2
ILMN_221274	Anxa3	1.25e-06	-1.57713	NM_013470.1
ILMN_235254	Cdc42ep2	1.25e-06	-1.622	NM_026772.1
ILMN_210831	Actg2	1.26e-06	-1.53286	NM_009610.1
ILMN_328905	LOC100043675	1.28e-06	1.92298	XM_001480621.1
ILMN_233307	Mfap5	1.29e-06	-1.55916	NM_015776.2
ILMN_218920	Akr1b8	1.3e-06	2.20056	NM_008012.1
ILMN_212396	Rai12	1.3e-06	1.55594	NM_018740.1
ILMN_211748	C1qbp	1.3e-06	2.12788	NM_007573.2
ILMN_218398	Rhbdl2	1.32e-06	-1.50399	NM_183163.2
ILMN_220571	Mmp14	1.33e-06	-1.63891	NM_008608.2
ILMN_211935	Mal	1.34e-06	1.60414	NM_010762.4
ILMN_248458	Fam162a	1.36e-06	1.59577	NM_027342.1
ILMN_186356	mtDNA_ND2	1.36e-06	1.71376
ILMN_219227	Fbxo18	1.37e-06	1.55692	NM_015792.1
ILMN_220513	Plod3	1.37e-06	-1.7463	NM_011962.2
ILMN_256989	Etl4	1.37e-06	-1.57843	NM_001081006.1
ILMN_231724	Mrpl44	1.38e-06	1.71781	NM_001081210.1
ILMN_196739	Hist1h4a	1.4e-06	-1.76979	NM_178192.1
ILMN_201627	1110014J17Rik	1.4e-06	1.56757	AK003702
ILMN_222555	1810063B05Rik	1.42e-06	1.68778	NM_174987.3
ILMN_248830	2310016E02Rik	1.47e-06	-1.52949	NM_024460.3
ILMN_215917	Immt	1.47e-06	1.98667	NM_029673.2
ILMN_209382	Tcn2	1.48e-06	1.65593	NM_015749.2
ILMN_189304	Wnt10a	1.48e-06	-1.98534	NM_009518.1
ILMN_218198	C030006K11Rik	1.49e-06	1.70083	NM_145472.1
ILMN_212975	Mtif3	1.51e-06	1.51273	NM_029581.3
ILMN_217774	Tra2a	1.51e-06	-1.54454	NM_198102.2
ILMN_187927	Usp2	1.53e-06	1.52163	NM_198091.2
ILMN_193115	Vdac2	1.54e-06	1.75435	NM_011695.2
ILMN_210969	Stard7	1.54e-06	1.83274	NM_139308.1
ILMN_211581	Ndufb5	1.57e-06	2.71896	NM_025316.2
ILMN_236658	2300009A05Rik	1.6e-06	1.94719	XM_898537.2
ILMN_222699	ORF63	1.66e-06	-1.80055	NM_144854.1
ILMN_215456	Mrpl18	1.66e-06	1.97486	NM_026310.3
ILMN_219217	Blcap	1.66e-06	1.5149	NM_016916.3
ILMN_210509	Riok3	1.69e-06	-1.50327	NM_024182.4
ILMN_193870	Sulf1	1.73e-06	-1.52818	NM_172294
ILMN_208682	Hist2h2be	1.74e-06	-1.51137	NM_178214.1
ILMN_210866	Fxyd6	1.88e-06	1.67762	NM_022004.6
ILMN_214033	Fez1	1.92e-06	-1.62419	NM_183171.1
ILMN_214296	Nrp1	1.95e-06	1.65347	NM_008737.1
ILMN_211239	Hspb2	1.96e-06	-1.69074	NM_024441.1
ILMN_216611	Pfn1	1.96e-06	-1.66788	NM_011072.2
ILMN_215041	Nans	1.97e-06	-1.67468	NM_053179.3
ILMN_318712	LOC100048313	2.05e-06	1.51307	XM_001480281.1
ILMN_232691	Fkbp4	2.09e-06	1.55585	NM_010219.3
ILMN_211466	Sox11	2.13e-06	-1.80699	NM_009234.3
ILMN_220803	Dhx35	2.15e-06	1.55608	NM_145742.1
ILMN_239705	Slc25a42	2.2e-06	1.57829	NM_001007570.1
ILMN_256145	Txndc13	2.22e-06	-1.64482	NM_029148.1
ILMN_195130	Uqcrh	2.25e-06	1.59216	NM_025641.3
ILMN_252535	Snx4	2.25e-06	-1.54116	NM_080557.2
ILMN_253256	Itfg3	2.27e-06	1.54437	NM_207217.3
ILMN_245068	Shf	2.27e-06	-1.83853	NM_001013829.2
ILMN_247290	Clec16a	2.43e-06	1.56707	NM_177562.4
ILMN_224538	Cdc42ep3	2.44e-06	-1.66184	NM_026514.2
ILMN_216610	Rab3a	2.44e-06	1.5869	NM_009001.3
ILMN_215984	Mgp	2.46e-06	-1.74912	NM_008597.3
ILMN_196725	Hist1h4m	2.48e-06	-1.52876	NM_175657.1
ILMN_218414	Mast3	2.51e-06	-1.63614	NM_199308.1
ILMN_229304	Cdsn	2.56e-06	1.5549	NM_001008424.2
ILMN_228105	2610528E23Rik	2.62e-06	1.71394	NM_025599.2
ILMN_214907	Nsun4	2.72e-06	1.5776	NM_028142.3
ILMN_217091	Gloxd1	2.72e-06	1.72918	NM_146256.2
ILMN_221215	Lyrm2	2.85e-06	-1.51033	NM_175364.3
ILMN_216099	Srxn1	2.93e-06	1.59164	NM_029688.2
ILMN_215787	Mic2l1	2.93e-06	-1.52158	NM_138309.1
ILMN_213897	Cplx1	3e-06	1.69524	NM_007756.2
ILMN_217537	Id2	3.01e-06	1.72912	NM_010496.2
ILMN_242028	Rassf3	3.04e-06	-1.5739	NM_138956.3
ILMN_234029	Nuak1	3.15e-06	-1.52029	NM_001004363.1
ILMN_210275	Stk17b	3.23e-06	-1.56473	NM_133810.2
ILMN_211715	Dnajc27	3.23e-06	1.53396	NM_153082.3
ILMN_211772	Atf3	3.29e-06	1.56788	NM_007498.2
ILMN_209558	D430028G21Rik	3.39e-06	1.60464	NM_144888.1
ILMN_246401	Aldh5a1	3.42e-06	1.54917	NM_172532.2
ILMN_196729	Hist1h2ah	3.46e-06	-1.72592	NM_175659.1
ILMN_255758	Pigq	3.47e-06	1.59616	NM_011822.3
ILMN_223225	Slc19a2	3.5e-06	1.55008	NM_054087.2
ILMN_256115	LOC654426	3.52e-06	1.65828	NR_002690.1
ILMN_208901	Nt5m	3.61e-06	1.66073	NM_134029.2
ILMN_315488	EG277333	3.63e-06	1.67905	NR_003623.1
ILMN_241738	Lmod3	3.67e-06	-1.637	NM_001081157.1
ILMN_222392	Tgfb3	3.67e-06	-1.65795	NM_009368.2
ILMN_212504	Sh3rf1	3.89e-06	-1.59573	NM_021506.2
ILMN_239601	Klk1b22	3.89e-06	1.74547	NM_010114.1
ILMN_223544	Rbck1	3.93e-06	1.58221	NM_019705.3
ILMN_223358	Aven	3.93e-06	1.51029	NM_028844.1
ILMN_258584	Gramd1b	3.99e-06	1.61155	NM_172768.1
ILMN_239393	Bin1	4.11e-06	-1.62046	NM_009668.1
ILMN_219306	Ebp	4.13e-06	-1.51631	NM_007898.2
ILMN_260361	Hist1h4i	4.2e-06	-1.6225	NM_175656.2
ILMN_216702	Cacnb1	4.22e-06	-1.58623	NM_031173.1
ILMN_223649	Mrps26	4.23e-06	1.5479	NM_207207.1
ILMN_219665	Mrpl1	4.38e-06	1.65071	NM_053158.1
ILMN_243326	Gmps	4.46e-06	1.52568	NM_001033300.2
ILMN_184424	Wars	4.51e-06	1.6509	NM_011710.2
ILMN_220626	Otog	4.56e-06	-1.78376	NM_013624.1
ILMN_227280	Kcnn1	4.56e-06	1.51694	NM_032397.1
ILMN_261196	Yif1b	4.71e-06	1.75024	NM_029887.2
ILMN_210428	Lamb3	4.73e-06	-1.67965	NM_008484.2
ILMN_184684	Tomm40	4.8e-06	1.68875	NM_016871
ILMN_251883	AK157302	4.89e-06	1.63126	XM_484225.5
ILMN_209931	Wipi1	5.02e-06	-1.63883	NM_145940.2
ILMN_240054	Hist1h3e	5.03e-06	-1.54269	NM_178205.1
ILMN_217954	Rg9mtd1	5.14e-06	1.67197	NM_029092.2
ILMN_223469	Tceal8	5.19e-06	-1.53414	NM_025703.2
ILMN_199796	LOC383942	5.21e-06	1.64288	XM_357338.1
ILMN_208695	Add3	5.24e-06	-1.65411	NM_013758.2
ILMN_213386	Hspe1	5.39e-06	1.99648	NM_008303.2
ILMN_232763	AU022252	5.5e-06	-1.58753	NM_001012400.1
ILMN_208815	Tle4	5.53e-06	1.72071	NM_011600.2
ILMN_252404	9430016H08Rik	5.54e-06	1.50872	XM_907464.2
ILMN_260214	Pnpla7	5.56e-06	1.77571	NM_146251.3
ILMN_220815	Swap70	5.66e-06	-1.50371	NM_009302.2
ILMN_238585	Adora1	5.7e-06	-1.52131	NM_001008533.2
ILMN_216659	Prpf19	5.77e-06	1.56024	NM_134129.2
ILMN_220650	Stac3	5.77e-06	-1.75016	NM_177707.3
ILMN_316229	LOC100047167	5.81e-06	-1.5363	XM_001477568.1
ILMN_210457	Mterfd3	6.02e-06	1.59264	NM_028832.1
ILMN_233714	Fam13b	6.25e-06	-1.53739	NM_146084.1
ILMN_234672	Dbt	6.26e-06	1.61623	NM_010022.1
ILMN_222600	Mrps9	6.61e-06	1.53916	NM_023514.3
ILMN_230015	Rps27a	6.61e-06	-1.62398	NM_001033865.1
ILMN_212207	Pip4k2b	6.67e-06	-1.6331	NM_054051.1
ILMN_219055	Dld	6.67e-06	2.23462	NM_007861.3
ILMN_220126	Mrps18a	6.67e-06	1.53888	NM_026768.3
ILMN_184561	mtDNA_ND4L	6.69e-06	2.59112
ILMN_208991	Ccdc44	6.78e-06	1.63793	NM_027346.1
ILMN_211197	2310039E09Rik	6.82e-06	-1.57835	NM_026509.1
ILMN_214897	Tead2	6.96e-06	-1.61894	NM_011565.2
ILMN_240866	Prkag1	7.03e-06	1.56874	NM_016781.2
ILMN_225319	Ypel5	7.04e-06	-1.57055	NM_027166.5
ILMN_208755	Pabpc4	7.15e-06	1.63411	NM_148917.2
ILMN_232418	1300010F03Rik	7.88e-06	1.5547	XM_001002205.2
ILMN_212155	Frap1	8.17e-06	1.70372	NM_020009.1
ILMN_210812	Atp10d	8.39e-06	1.53701	NM_153389.2
ILMN_221434	Acox3	8.62e-06	1.53237	NM_030721.2
ILMN_209570	Mpnd	8.65e-06	1.51253	NM_026530.5
ILMN_215172	Flrt2	8.73e-06	-1.55318	NM_201518.1
ILMN_260084	Crxos1	8.85e-06	1.51795	NM_001033638.1
ILMN_315337	LOC333331	9e-06	2.79695	XR_032458.1
ILMN_332368	LOC100042405	9.15e-06	-1.60194	XM_001478555.1
ILMN_248898	Triobp	9.29e-06	-1.5364	NM_001039156.1
ILMN_217595	Irak2	9.38e-06	-1.51437	NM_172161.2
ILMN_216977	Mterfd2	9.54e-06	1.52463	NM_178051.3
ILMN_209733	Mff	9.72e-06	1.55472	NM_029409.2
ILMN_194875	Usmg5	1.01e-05	1.8786	NM_023211.4
ILMN_215119	Mrps34	1.02e-05	1.52274	NM_023260.1
ILMN_190183	Cd8b	1.02e-05	-1.58924	NM_009858
ILMN_196492	2310036I02Rik	1.03e-05	1.79468	XM_128950.4
ILMN_214346	Atp6v1d	1.04e-05	1.54426	NM_023721.2
ILMN_211934	Sgca	1.05e-05	-1.50137	NM_009161.1
ILMN_217704	Ard1	1.06e-05	1.521	NM_019870.1
ILMN_236021	AI848100	1.06e-05	-1.53163	XM_975051.2
ILMN_209701	Ppap2a	1.07e-05	-1.57333	NM_008903.1
ILMN_223518	Chrd	1.08e-05	-2.01646	NM_009893.1
ILMN_225719	2010107H07Rik	1.08e-05	1.56645	XM_909437.2
ILMN_218521	Chpt1	1.08e-05	1.60974	NM_144807.2
ILMN_213030	Rtn2	1.11e-05	-1.52674	NM_013648.5
ILMN_247161	6430706D22Rik	1.13e-05	-1.53427	NM_198652.1
ILMN_216090	Timm8b	1.16e-05	1.52342	NM_013897.1
ILMN_186398	Tmem14c	1.22e-05	1.65872	NM_025387.2
ILMN_312076	LOC668837	1.28e-05	2.10678	XR_034960.1
ILMN_223498	Rab1	1.29e-05	-1.83089	NM_008996.3
ILMN_310024	OTTMUSG00000001070	1.33e-05	-1.63279	NM_001099331.1
ILMN_212339	Sypl2	1.34e-05	-1.59512	NM_008596.1
ILMN_208644	Bid	1.35e-05	-1.64411	NM_007544.3
ILMN_219950	Mtap7d1	1.35e-05	-1.53115	NM_144941.2
ILMN_212253	Ppa2	1.38e-05	1.74615	NM_146141.1
ILMN_245175	Best1	1.39e-05	-1.55156	NM_011913.1
ILMN_249760	P4ha2	1.4e-05	-1.52767	NM_011031.1
ILMN_210158	Cdk5rap1	1.4e-05	1.50181	NM_025876.2
ILMN_310214	LOC100048480	1.4e-05	1.53228	XM_001480451.1
ILMN_213755	Fmo1	1.44e-05	1.51883	NM_010231.2
ILMN_195299	Egr3	1.47e-05	-1.65713	NM_018781
ILMN_197525	LOC380927	1.47e-05	1.62668	XM_354834.1
ILMN_190104	2310079P10Rik	1.49e-05	-1.50474
ILMN_237973	Rnf123	1.51e-05	1.51231	NM_032543.1
ILMN_221367	Stim1	1.6e-05	1.80395	NM_009287.4
ILMN_220148	Tubb6	1.63e-05	-1.56208	NM_026473.2
ILMN_220430	Zfp768	1.71e-05	1.83552	NM_146202.1
ILMN_220489	Atp1a2	1.72e-05	2.39773	NM_178405.3
ILMN_192050	Vegfa	1.81e-05	1.63645	NM_009505.3
ILMN_210376	Ndufb9	1.84e-05	2.21251	NM_023172.3
ILMN_258443	Sel1l	1.9e-05	-1.55642	NM_001039089.1
ILMN_220103	Pim3	1.9e-05	1.73174	NM_145478.1
ILMN_214199	Armcx1	1.94e-05	-1.58289	NM_030066.2
ILMN_213768	Pak4	1.95e-05	-1.6834	NM_027470.3
ILMN_219962	Hmga1	1.98e-05	1.92771	NM_016660.2
ILMN_215067	Suv420h2	2.16e-05	1.53898	NM_146177.1
ILMN_212301	Ndufs4	2.16e-05	1.59288	NM_010887.1
ILMN_214838	Hist1h2bj	2.16e-05	-1.66355	NM_178198.1
ILMN_221287	Nrm	2.19e-05	-1.55824	NM_134122.2
ILMN_221992	Ganc	2.2e-05	1.53176	NM_172672.2
ILMN_242380	Zfp787	2.28e-05	1.55092	NM_001013012.1
ILMN_209757	Actc1	2.33e-05	-1.51754	NM_009608.3
ILMN_209774	Mocs2	2.4e-05	1.62488	NM_013826.2
ILMN_210163	Plp2	2.53e-05	-1.56034	NM_019755.2
ILMN_222259	Dhcr24	2.55e-05	-1.66742	XM_131538.1
ILMN_219336	Lox	2.56e-05	-1.52432	NM_010728.1
ILMN_212397	Neurl	2.6e-05	-1.5935	NM_021360
ILMN_320828	LOC100047963	2.77e-05	-1.50094	XM_001479238.1
ILMN_233981	Lmo7	2.77e-05	-1.56115	XM_895783.2
ILMN_214522	Nfs1	2.83e-05	1.51019	NM_010911.1
ILMN_196733	Hist1h2af	2.88e-05	-1.50304	NM_175661.1
ILMN_248745	2310015B20Rik	2.92e-05	-1.70563	XM_907184.2
ILMN_209245	Polr3h	2.93e-05	-1.51526	NM_030229.4
ILMN_194247	mt-Atp6	2.97e-05	1.50673
ILMN_216043	Anxa11	3.03e-05	-1.62518	NM_013469.1
ILMN_243591	Tcea3	3.07e-05	1.53112	NM_011542.1
ILMN_224679	Hspb1	3.15e-05	-1.59841	NM_013560.1
ILMN_243082	Pnpla8	3.18e-05	1.70326	NM_026164.2
ILMN_317841	Atp13a3	3.27e-05	-1.67026	XM_001480958.1
ILMN_228863	Cdh13	3.33e-05	-1.52422	NM_019707.4
ILMN_233339	Snx21	3.47e-05	1.51142	NM_133924.2
ILMN_208959	Cpne2	3.5e-05	-1.61431	NM_153507.2
ILMN_260938	LOC669660	3.63e-05	-1.5438	XM_976375.1
ILMN_317267	Abhd1	3.72e-05	-1.53134	NR_003522.1
ILMN_194147	Col8a2	3.81e-05	-1.5764	NM_199473
ILMN_209616	Chrna1	3.83e-05	-1.61755	NM_007389.4
ILMN_216144	Iars2	4.11e-05	1.50621	NM_198653.1
ILMN_189540	Ube2m	4.23e-05	1.74805	NM_145578.1
ILMN_214284	Lman1l	4.29e-05	1.50182	NM_199222.2
ILMN_212429	Cacnb3	4.31e-05	-1.68454	NM_007581.2
ILMN_223558	Asb2	4.47e-05	1.6696	NM_023049.1
ILMN_185395	mt-Co2	4.53e-05	1.53963
ILMN_223783	Ndufb4	4.57e-05	1.70183	NM_026610.1
ILMN_210691	Nol1	4.59e-05	1.52408	NM_138747.1
ILMN_208729	Dcun1d4	4.6e-05	-1.56988	NM_178896.2
ILMN_186256	Wasf1	4.61e-05	-1.51779	NM_031877.2
ILMN_214744	Nes	4.84e-05	-1.76217	NM_016701.3
ILMN_215927	Mrpl20	4.92e-05	1.79973	NM_025570.2
ILMN_214912	Tmem150	4.99e-05	1.52047	NM_144916.1
ILMN_188811	scl000408.1_6	5.41e-05	1.54582	AK009508.1
ILMN_224541	Sytl2	5.7e-05	-1.54656	NM_001040088.1
ILMN_216662	Phospho1	5.74e-05	1.54554	NM_153104.2
ILMN_213079	Mtap4	6.06e-05	-1.52209	NM_008633.2
ILMN_218348	1700023B02Rik	6.58e-05	-1.60414	NM_025854.1
ILMN_321987	LOC623453	6.65e-05	-1.51357	XR_032986.1
ILMN_216406	Triap1	6.88e-05	1.58988	NM_026933.2
ILMN_227037	Snx7	6.94e-05	-1.55022	NM_029655.2
ILMN_218758	Mmp15	7.04e-05	-1.73908	NM_008609.3
ILMN_212274	Rab24	7.14e-05	1.53176	NM_009000.3
ILMN_257155	Dnajc19	7.17e-05	1.50513	NM_001026211.1
ILMN_210757	Skiv2l2	7.46e-05	1.68982	NM_028151.2
ILMN_186352	scl0002720.1_68	7.47e-05	1.53483	AK053156.1
ILMN_235437	Epn2	7.51e-05	-1.56162	NM_010148.2
ILMN_249661	Vamp5	7.81e-05	-1.59914	NM_001080742.1
ILMN_244221	Rbbp4	8.16e-05	-1.51736	NM_009030.3
ILMN_231697	2310014H01Rik	8.33e-05	-1.50188	XM_001003622.2
ILMN_234025	Crat	8.46e-05	1.79559	NM_007760.3
ILMN_211490	Sgta	8.5e-05	1.5331	NM_024499.1
ILMN_209199	Bud13	8.53e-05	-1.5094	NM_146000.2
ILMN_211278	Mapkapk2	8.84e-05	1.73785	NM_008551.1
ILMN_217148	Art1	9.55e-05	1.52913	NM_009710.4
ILMN_236003	Klf5	9.69e-05	-1.52003	NM_009769.4
ILMN_235674	Pdlim5	0.000100824	-1.55963	NM_019809.1
ILMN_312506	LOC100046025	0.00010399	-1.52674	XM_001475823.1
ILMN_221299	Tesk1	0.000107746	-1.55678	NM_011571.2
ILMN_194550	Wfs1	0.000114888	-1.50486	NM_011716.2
ILMN_211915	Thra	0.000126826	1.51989	XM_126580.1
ILMN_217932	Acadl	0.000131148	1.69073	NM_007381.3
ILMN_189658	Vdac3	0.000136352	1.63815	NM_011696.1
ILMN_218878	Itga7	0.000140029	-1.52527	NM_008398.2
ILMN_217903	Areg	0.000141637	1.50601	NM_009704.3
ILMN_223631	Atn1	0.000148143	1.53104	NM_007881.4
ILMN_209223	Kifc3	0.000160488	1.50407	NM_010631.2
ILMN_312482	LOC100044475	0.000165291	-1.51291	XM_001472256.1
ILMN_242106	Parl	0.000173614	1.5702	NM_001005767.3
ILMN_209294	Gipc1	0.00017816	1.5532	NM_018771.3
ILMN_210875	Mylc2b	0.000179784	-1.53533	NM_023402.1
ILMN_189219	Tulp4	0.000182413	-1.50645	NM_054040.2
ILMN_199353	LOC385644	0.00018738	-1.6563	XM_358834.1
ILMN_237158	Mbnl2	0.000199223	1.56511	NM_175341.4
ILMN_258698	EG433144	0.000213539	1.88844	XM_484670.5
ILMN_222592	Cacna2d1	0.000246946	-1.54892	NM_009784.1
ILMN_202822	9030619K07Rik	0.000300323	1.53888	AK033556
ILMN_221016	Lias	0.000350552	1.55586	NM_024471.4
ILMN_224297	Sox9	0.000370969	-1.61848	NM_011448
ILMN_212767	Car3	0.000373836	1.74035	NM_007606.3
ILMN_224225	Irx3	0.000374902	-1.56933	NM_008393
ILMN_226251	1810035L17Rik	0.000418962	1.5294	NM_026958.2
ILMN_210704	Ifi202b	0.00044134	-1.67853	NM_008327.1
ILMN_226970	Ndufb2	0.000442844	1.59364	NM_026612.1
ILMN_226867	Myl6b	0.000507778	1.75004	NM_172259.1
ILMN_238988	Abcb7	0.000532965	1.56663	XM_907304.2
ILMN_312763	LOC100041703	0.000548793	1.52733	XM_001477173.1
ILMN_215512	Dhcr7	0.000553359	-1.53177	NM_007856.2
ILMN_219729	Timp2	0.000603943	-1.53413	NM_011594.3
ILMN_219639	4930403O06Rik	0.000613316	1.57893	NM_026881.1
ILMN_214427	Kif1b	0.000688972	1.55454	NM_207682.2
ILMN_210116	Nr1d2	0.000728275	1.63476	NM_011584.2
ILMN_212510	4930455C21Rik	0.000841735	1.53847	XM_148429.1
ILMN_259946	LOC676974	0.000858117	1.99298	XM_001003154.1
ILMN_210887	Mtch2	0.000858347	1.59095	NM_019758.2
ILMN_219053	Gbas	0.000868126	3.07884	NM_008095.3
ILMN_209821	Gdi1	0.000968991	-1.55161	NM_010273.3
ILMN_238798	Uchl3	0.0012101	1.71212	NM_016723.1
ILMN_222285	Ivns1abp	0.0013218	1.50248	NM_054102.2
ILMN_217356	C1galt1c1	0.00256909	-1.61283	NM_021550.2
ILMN_229231	Myh4	0.00282117	-1.5535	NM_010855.2
ILMN_242745	Chrnd	0.00427301	-1.58887	NM_021600.2
ILMN_217812	Col1a1	0.00591798	1.55562	NM_007742.2
ILMN_196339	Dynll2	0.00658086	1.72812	NM_026556.3
ILMN_310361	EG633692	0.00691179	-1.52484	XM_001472244.1

## Sheet: PGC-1beta
Transcript	Gene Symbol	p-value	Fold-Change (GFP vs.PGC-1b)	NCBI Accession
ILMN_218610	Ckmt2	7.51e-20	14.2888	NM_198415.1
ILMN_220582	Sncb	1.39e-19	7.96699	NM_033610.2
ILMN_217987	Csrp3	8.65e-19	-8.57483	NM_013808.3
ILMN_215598	Cox7a1	2.78e-18	12.9624	NM_009944.3
ILMN_214177	Eef1a2	3.46e-18	19.5706	NM_007906.2
ILMN_244950	EG433229	4.3e-18	9.12973	XM_899874.3
ILMN_187524	2600009P04Rik	4.73e-18	4.77831
ILMN_212186	Ccbl1	9.9e-18	5.87811	NM_172404.2
ILMN_216567	Hcn2	1.1e-17	7.84074	NM_008226.2
ILMN_257170	Sla2	2.37e-17	6.41138	NM_029983.4
ILMN_220378	Slc2a4	3.12e-17	4.36825	NM_009204.2
ILMN_213720	Atp6v1g2	4.48e-17	8.20311	NM_023179.3
ILMN_218734	Msrb2	5.58e-17	7.74257	NM_029619.2
ILMN_210014	Oxct1	9.14e-17	4.76789	NM_024188.5
ILMN_209043	9530058B02Rik	1.42e-16	9.00154	NM_026633.3
ILMN_235471	Ckmt1	1.43e-16	6.81868	NM_009897.2
ILMN_221565	Cidea	1.53e-16	6.65423	NM_007702.1
ILMN_223612	Esrra	1.74e-16	4.49707	NM_007953.2
ILMN_220920	Calr3	1.8e-16	8.46672	NM_029782.3
ILMN_233456	Tmem201	1.91e-16	4.00994	NM_001025106.1
ILMN_211007	Slc25a19	2.17e-16	6.56139	NM_026071.2
ILMN_198408	LOC226017	2.62e-16	8.45625	XM_129164.2
ILMN_252464	Cib3	3.36e-16	9.09278	XM_904518.3
ILMN_216083	Hba-a1	5.29e-16	11.8907	NM_008218.2
ILMN_215976	Psmb10	5.99e-16	4.86065	NM_013640.2
ILMN_232786	Alox5	6.99e-16	-4.98188	NM_009662.2
ILMN_212812	Nme7	7.1e-16	4.23325	NM_138314.2
ILMN_217547	2310042D19Rik	8.61e-16	11.009	NM_172417.1
ILMN_249685	Gm166	9.05e-16	3.71064	NM_001033040.2
ILMN_210416	Mb	1.15e-15	-4.99234	NM_013593.2
ILMN_213266	Guca2a	1.33e-15	9.13528	NM_008190.1
ILMN_211726	Slc2a6	1.63e-15	-7.91437	NM_172659.2
ILMN_211735	Coq6	1.82e-15	5.12097	NM_172582.2
ILMN_258804	5430437P03Rik	1.83e-15	2.78707	NM_026636.1
ILMN_222397	Chchd10	1.87e-15	11.7154	NM_175329.3
ILMN_213110	BC004728	2.04e-15	4.06762	NM_174992.2
ILMN_210344	B230317C12Rik	2.6e-15	6.94992	NM_019833.2
ILMN_219255	Cyhr1	2.72e-15	5.41224	NM_180962.1
ILMN_218508	Tcap	3.61e-15	-6.71944	NM_011540.2
ILMN_226239	Pnpla2	3.88e-15	5.98846	NM_025802.2
ILMN_229399	Eif1ad	3.92e-15	4.68672	NM_027236.2
ILMN_259430	Ampd1	4.04e-15	-3.11689	NM_001033303.2
ILMN_211494	2310005E10Rik	4.12e-15	3.67977	NM_172398.3
ILMN_210961	Acads	4.23e-15	4.52715	NM_007383.2
ILMN_213512	Icam4	4.59e-15	4.20567	NM_023892.2
ILMN_239825	Serpinb9f	4.7e-15	-3.81336	NM_183197.1
ILMN_222340	Tesc	4.73e-15	9.9194	NM_021344.2
ILMN_221418	Mrpl12	4.82e-15	3.85585	NM_027204.2
ILMN_189570	Tufm	5.27e-15	4.59734	NM_172745.2
ILMN_228289	Rnf5	5.5e-15	5.9626	NM_019403.3
ILMN_213403	Retsat	5.59e-15	7.44646	NM_026159.4
ILMN_210493	Acot7	5.72e-15	2.87186	NM_133348.1
ILMN_219924	Tceal7	5.78e-15	-8.36911	XM_136051.3
ILMN_249043	Acadvl	5.78e-15	4.23267	NM_017366.1
ILMN_210632	Agxt2l2	6.2e-15	3.71221	NM_028398.1
ILMN_325537	Myom3	6.37e-15	-5.05961	NM_001085509.1
ILMN_230609	Cpt2	6.59e-15	4.45625	NM_009949.1
ILMN_222252	Nudt19	6.62e-15	6.30011	NM_033080.2
ILMN_188946	Ung	7.64e-15	6.02081	NM_011677.2
ILMN_187510	Upp1	7.91e-15	5.49239	NM_009477.1
ILMN_217236	1810049H13Rik	8.51e-15	2.90404	NM_025560.2
ILMN_196457	Aim1l	8.79e-15	7.41193	XM_131754.7
ILMN_253999	Crim2	9.11e-15	3.80468	NM_001029985.1
ILMN_223812	BC019806	9.45e-15	4.54331	NM_145460
ILMN_237912	Mett11d1	9.48e-15	4.30424	NM_001029990.1
ILMN_260273	B230339M05Rik	1.03e-14	2.20444	NM_177658.3
ILMN_213233	Kcnh2	1.21e-14	3.97273	NM_013569.1
ILMN_223048	Cycs	1.22e-14	4.50023	NM_007808.4
ILMN_188390	Uqcrc1	1.25e-14	3.02182	NM_025407.2
ILMN_209038	Mllt11	1.4e-14	-3.66745	NM_019914.3
ILMN_214607	Rpl3l	1.46e-14	2.92692	NM_025425.3
ILMN_190343	Galt	1.51e-14	5.18059	NM_016658.2
ILMN_211824	Tfrc	1.52e-14	3.45743	NM_011638.3
ILMN_216000	Atp5sl	1.59e-14	3.79278	NM_025504.4
ILMN_246297	Pard6a	1.62e-14	6.18678	NM_019695.2
ILMN_224727	Synpo2l	1.64e-14	-4.71291	NM_175132.3
ILMN_223586	Mfsd7a	1.82e-14	-5.84412	NM_172883.2
ILMN_221394	Eral1	1.82e-14	2.81107	NM_022313.1
ILMN_260135	Mast4	2.16e-14	-2.62264	XM_915307.3
ILMN_221393	Mrpl37	2.2e-14	2.43457	NM_025500.1
ILMN_219309	Sirt5	2.24e-14	4.24352	NM_178848.3
ILMN_188416	scl0003151.1_1374	2.32e-14	-4.54805	AK010153.1
ILMN_249502	Mrpl47	2.57e-14	4.61606	NM_029017.1
ILMN_215825	Akr1b7	2.74e-14	8.74281	NM_009731.1
ILMN_223696	Cs	2.81e-14	3.26293	NM_026444.3
ILMN_224873	Bdh1	2.88e-14	9.35382	NM_175177.3
ILMN_213918	Lace1	2.89e-14	3.93296	NM_145743.2
ILMN_233962	ENSMUSG00000054212	2.95e-14	3.54523	NM_145433.1
ILMN_217499	Gpt1	3.01e-14	4.11383	NM_182805.1
ILMN_222668	Cend1	3.02e-14	4.64798	NM_021316.2
ILMN_215485	Ppif	3.04e-14	6.16423	NM_134084.1
ILMN_223392	Ntan1	3.06e-14	2.91363	NM_010946.2
ILMN_206357	D430022H17Rik	3.08e-14	4.13379	AK084998
ILMN_221774	Idh3a	3.12e-14	5.07799	NM_029573.2
ILMN_221825	Mrpl46	3.21e-14	5.94195	NM_023331.2
ILMN_209876	Slc25a11	3.62e-14	4.26743	NM_024211.2
ILMN_199766	LOC382972	3.7e-14	-5.09283	XM_356781.1
ILMN_235198	Mef2c	3.87e-14	-5.79506	NM_025282.2
ILMN_213697	Ogdh	3.93e-14	4.3944	NM_010956.3
ILMN_211983	Fgfrl1	4.11e-14	-5.03912	NM_054071.1
ILMN_235158	Atp5o	4.24e-14	2.47279	NM_138597.2
ILMN_215828	Mrpl38	4.24e-14	4.34925	NM_024177.3
ILMN_254113	Tmem147	4.31e-14	2.91326	NM_027215.2
ILMN_212537	Fbxo2	4.34e-14	4.40398	NM_176848.1
ILMN_241738	Lmod3	4.52e-14	-7.24536	NM_001081157.1
ILMN_219921	Rnmtl1	4.67e-14	4.9287	NM_183263.3
ILMN_315139	LOC100044257	4.75e-14	-4.39922	XM_001471785.1
ILMN_253331	Tomm40l	4.76e-14	2.59449	NM_001037170.2
ILMN_251763	Porcn	4.77e-14	-5.23328	NM_145908.1
ILMN_209476	Hibadh	4.87e-14	3.2721	NM_145567.1
ILMN_238585	Adora1	4.99e-14	-5.73191	NM_001008533.2
ILMN_209615	Pcyt2	5.07e-14	3.92275	NM_024229.2
ILMN_257429	Chkb	5.18e-14	2.93915	NM_007692.5
ILMN_184853	Trib3	5.23e-14	3.84748	NM_175093.2
ILMN_223004	Dlat	5.35e-14	3.62162	NM_145614.3
ILMN_227083	Acadm	5.37e-14	3.37281	NM_007382.1
ILMN_211469	Letmd1	5.46e-14	4.48504	NM_134093.1
ILMN_210543	Card10	5.5e-14	2.97181	NM_130859.2
ILMN_219800	Fahd1	5.52e-14	4.43016	NM_023480.2
ILMN_218079	Tspan32	5.75e-14	-3.86488	NM_020286.2
ILMN_217333	Ndufa8	5.87e-14	2.70463	NM_026703.1
ILMN_214799	1110006G06Rik	6.11e-14	2.87612	NM_028661.1
ILMN_208730	Brp44	6.12e-14	4.76525	NM_027430.1
ILMN_221583	Sirt3	6.25e-14	3.90509	NM_022433.1
ILMN_219387	Hccs	6.38e-14	2.0244	NM_008222.2
ILMN_215827	Alas1	6.66e-14	3.71445	NM_020559.1
ILMN_242057	Clpp	6.83e-14	3.12422	NM_017393.1
ILMN_330329	LOC100044376	6.86e-14	-2.70182	XR_030576.1
ILMN_211245	Bola3	6.95e-14	2.4373	NM_175277.2
ILMN_215732	Rhot2	6.96e-14	3.38444	NM_145999.2
ILMN_238078	Igfbp5	6.97e-14	-2.4865	NM_010518.2
ILMN_252778	Mrps18b	7.09e-14	2.99277	NM_025878.1
ILMN_231110	Rhox10	7.44e-14	-2.66039	NM_001024850.2
ILMN_218368	Reep1	7.67e-14	-3.72057	NM_178608.2
ILMN_223119	Myoz2	7.98e-14	-7.21365	NM_021503.1
ILMN_214033	Fez1	8.15e-14	-5.70919	NM_183171.1
ILMN_213948	Pvalb	8.15e-14	5.06905	NM_013645.3
ILMN_188350	scl0003835.1_21	8.36e-14	-6.61183	AK010240.1
ILMN_259704	Fbxl15	8.38e-14	2.94934	NM_133694.2
ILMN_209571	BC025446	8.44e-14	-5.56391	NM_146058.1
ILMN_209684	Mrpl43	8.54e-14	3.57448	NM_053164.3
ILMN_194765	A930005H10Rik	8.6e-14	2.01816
ILMN_234129	Aup1	8.65e-14	3.57903	NM_007517.3
ILMN_222912	Cbr2	8.79e-14	3.9993	NM_007621.1
ILMN_240635	Ddo	8.9e-14	2.92149	NM_027442.4
ILMN_215692	E2f2	9.08e-14	-4.69521	NM_177733.2
ILMN_218897	Strbp	9.3e-14	2.88855	NM_009261.2
ILMN_212375	Fam171a2	9.72e-14	-4.66568	NM_199200.2
ILMN_212573	Serpinb6c	1e-13	-2.62392	NM_148942.2
ILMN_258819	Hsd3b7	1.06e-13	-2.09115	NM_133943.2
ILMN_215350	Mustn1	1.08e-13	-5.18454	NM_181390.1
ILMN_229693	LOC665180	1.09e-13	1.8587	XM_975103.2
ILMN_223470	Cyc1	1.12e-13	3.82197	NM_025567.2
ILMN_212569	Etfb	1.14e-13	3.55636	NM_026695.2
ILMN_198399	LOC225897	1.17e-13	3.19697	XM_148897.3
ILMN_257425	Dhx58	1.17e-13	2.89846	NM_030150.2
ILMN_213701	Arl6ip5	1.28e-13	-2.97519	NM_022992.2
ILMN_211390	Fsd2	1.32e-13	2.65388	NM_172904.2
ILMN_213954	Pdlim3	1.37e-13	-5.71855	NM_016798.3
ILMN_249986	Cytip	1.45e-13	1.81205	NM_139200.4
ILMN_223681	Atp1b1	1.46e-13	5.48757	NM_009721.4
ILMN_227258	Wdr18	1.52e-13	2.70292	NM_175450.4
ILMN_217044	Gja5	1.52e-13	-5.24867	NM_008121.2
ILMN_223233	Cyp2d22	1.57e-13	3.04883	NM_019823.3
ILMN_196566	Atpaf2	1.59e-13	3.18368	NM_145427.1
ILMN_223037	Dtna	1.61e-13	-3.64409	NM_010087.3
ILMN_215405	Mrps11	1.64e-13	3.23375	NM_026498.1
ILMN_241732	Tceal5	1.72e-13	-3.4529	NM_177919.1
ILMN_215905	Lrpprc	1.79e-13	4.02041	NM_028233.1
ILMN_210692	Dnaja3	1.87e-13	2.67051	NM_023646.3
ILMN_199347	LOC386486	1.88e-13	5.16263	XM_359329.1
ILMN_249693	Megf10	1.89e-13	-4.08174	NM_001001979.1
ILMN_190104	2310079P10Rik	1.9e-13	-5.33287
ILMN_215027	Drp2	1.9e-13	-2.61372	NM_010078.2
ILMN_212461	Spsb4	1.92e-13	4.48222	NM_145134.2
ILMN_216598	Mrps24	1.96e-13	2.00885	NM_026080.2
ILMN_259234	1300001I01Rik	1.97e-13	5.41256	NM_001081158.2
ILMN_219246	Stard5	1.99e-13	2.53168	NM_023377.4
ILMN_231065	Ndufb6	2.09e-13	2.49528	NM_001033305.2
ILMN_211847	Dap3	2.15e-13	3.20496	NM_022994.2
ILMN_216493	Cpt1b	2.45e-13	6.89835	NM_009948.1
ILMN_220499	Fahd2a	2.49e-13	2.14796	NM_029629.1
ILMN_221800	Ppcs	2.5e-13	3.59732	NM_026494.3
ILMN_201631	1110002D22Rik	2.54e-13	3.56858	AK003285
ILMN_214204	Ndrg2	2.54e-13	3.08506	NM_013864
ILMN_217542	Srpk3	2.6e-13	-5.54743	NM_019684.1
ILMN_222302	2310003L22Rik	2.61e-13	3.47736	NM_027093.3
ILMN_249623	Slc25a34	2.66e-13	3.39597	NM_001013780.1
ILMN_191704	Pdss1	2.84e-13	4.2878	NM_019501.3
ILMN_244170	EG433923	2.85e-13	3.04942	NM_001081233.1
ILMN_214564	Ndufa3	2.85e-13	2.69027	NM_025348
ILMN_221081	Tmub1	2.89e-13	2.7116	NM_022418.1
ILMN_220439	Hmg20b	2.9e-13	3.30098	NM_010440.2
ILMN_216950	Grpel1	2.93e-13	4.20678	NM_024478.2
ILMN_196228	Trio	2.94e-13	-2.80464
ILMN_241505	Myom1	2.95e-13	-3.24575	NM_010867.2
ILMN_184501	Chrng	2.96e-13	-6.2017	NM_009604
ILMN_207558	Tubb2b	2.97e-13	-2.28269	NM_023716.2
ILMN_185361	C78339	3.06e-13	-2.44339	XM_127312
ILMN_216328	Etfdh	3.08e-13	4.6634	NM_025794.1
ILMN_213279	Il11ra1	3.08e-13	2.61715	NM_010549.2
ILMN_212206	1110001J03Rik	3.11e-13	4.83989	NM_025363.2
ILMN_245416	Fhl1	3.14e-13	-4.36329	NM_001077362.1
ILMN_240427	Rhobtb1	3.14e-13	-3.32879	NM_001081347.1
ILMN_219645	Ndufs8	3.21e-13	2.40616	NM_144870.4
ILMN_192063	Ush1c	3.23e-13	1.89846	NM_153677.1
ILMN_211802	Mrps16	3.23e-13	4.1042	NM_025440.2
ILMN_258260	Gstp2	3.25e-13	5.04873	NM_181796.2
ILMN_226277	Glrx5	3.26e-13	2.7578	NM_028419.2
ILMN_239761	Gm1679	3.4e-13	2.51414	NM_001033459.1
ILMN_214673	Itgb1bp2	3.45e-13	-4.80504	NM_013712.2
ILMN_206359	C430015A10Rik	3.52e-13	2.81338	AK082906
ILMN_212852	Mdh1	3.56e-13	3.3052	NM_008618.2
ILMN_258011	EG433224	3.61e-13	3.46287	NR_002891.1
ILMN_233633	EG623230	3.62e-13	3.81917	XM_887671.3
ILMN_229771	Tm6sf1	3.68e-13	2.91724	NM_145375.1
ILMN_229631	Rap1gap	3.86e-13	3.95541	NM_001081155.1
ILMN_209329	Tha1	3.9e-13	3.32429	NM_027919.3
ILMN_210061	Plcg2	3.9e-13	-2.22288	NM_172285.1
ILMN_248201	1810043H04Rik	3.94e-13	3.05179	XM_903145.3
ILMN_242271	Nelf	4.22e-13	3.32586	NM_001039387.1
ILMN_210091	Dgat1	4.24e-13	3.88886	NM_010046.2
ILMN_209757	Actc1	4.46e-13	-5.28625	NM_009608.3
ILMN_218088	Ndufa5	4.49e-13	2.76964	NM_026614.2
ILMN_199362	Mrpl9	4.54e-13	3.25731	NM_030116.2
ILMN_259201	Entpd5	4.63e-13	4.32693	NM_007647.2
ILMN_222245	BC022224	4.72e-13	4.74233	NM_177564.4
ILMN_215033	Rtn4ip1	4.86e-13	3.45214	NM_130892.2
ILMN_208688	Plekhm1	5.34e-13	-2.17945	NM_183034.1
ILMN_217940	Diras1	5.36e-13	3.19741	NM_145217.2
ILMN_208856	Mrpl55	5.37e-13	3.59728	NM_026035.1
ILMN_244327	Pex10	5.38e-13	2.24424	NM_001042407.1
ILMN_227596	Impa2	5.45e-13	2.79183	NM_053261.2
ILMN_218315	Lxn	5.55e-13	-2.81891	NM_016753.4
ILMN_217468	Gdpd1	5.69e-13	2.20233	NM_025638.1
ILMN_192989	Tst	5.71e-13	3.33747	NM_009437.4
ILMN_260140	Osr2	6.21e-13	2.20471	NM_054049.2
ILMN_215178	BC028528	6.22e-13	3.67586	NM_153513.1
ILMN_212633	Mrpl49	6.33e-13	2.12351	NM_026246.3
ILMN_221363	Ndufb3	6.34e-13	1.91326	NM_025597.2
ILMN_218297	Aadacl1	6.49e-13	3.3228	NM_178772.2
ILMN_216938	Plvap	6.52e-13	2.21367	NM_032398.1
ILMN_213625	Hmgn2	6.61e-13	-2.54324	NM_016957.3
ILMN_215664	Oplah	6.69e-13	4.32578	NM_153122.2
ILMN_209664	Cdkn1a	6.75e-13	-2.95608	NM_007669.3
ILMN_221419	Gdf15	7.06e-13	3.29538	NM_011819.1
ILMN_313453	LOC100045981	7.19e-13	2.81308	XM_001475298.1
ILMN_212018	Amhr2	7.45e-13	2.02922	NM_144547.1
ILMN_309967	1500032D16Rik	7.49e-13	2.33081	NM_001083891.1
ILMN_196369	Aco2	7.56e-13	3.26508	NM_080633.2
ILMN_218588	Grhpr	7.69e-13	2.52771	NM_080289.1
ILMN_211496	Letm1	7.72e-13	3.81307	NM_019694.1
ILMN_218962	AU040829	7.73e-13	-3.06072	NM_175003.3
ILMN_220540	Nubp2	7.77e-13	3.69471	NM_011956.2
ILMN_223560	Ccdc68	7.8e-13	2.02358	NM_201362.1
ILMN_212349	Trak2	7.98e-13	2.51395	NM_172406.2
ILMN_210415	Cox6a1	8.14e-13	2.60608	NM_007748.2
ILMN_216366	Fxn	8.19e-13	1.71676	NM_008044.1
ILMN_214761	Gpr137	8.2e-13	3.70381	NM_207220.1
ILMN_218669	Kcnk5	8.26e-13	-2.26447	NM_021542.2
ILMN_209839	Slc44a2	8.75e-13	-2.91656	NM_152808.2
ILMN_208975	Cecr5	8.75e-13	2.68932	NM_144815.2
ILMN_255544	Tbcd	8.81e-13	-2.20318	NM_029878.1
ILMN_252773	Rom1	8.83e-13	3.52916	NM_009073.3
ILMN_223114	D10Jhu81e	8.93e-13	3.82347	NM_138601.1
ILMN_226248	Pdss2	8.98e-13	3.9102	XM_988312.1
ILMN_249926	1700008I05Rik	9.03e-13	-2.60455	NM_027952.2
ILMN_214099	Dalrd3	9.06e-13	3.73374	NM_026378.3
ILMN_219323	Slc44a1	9.09e-13	-2.73349	NM_133891.2
ILMN_217220	1500019G21Rik	9.23e-13	2.88454	NM_024172.2
ILMN_218083	Bcs1l	9.32e-13	3.23087	NM_025784.2
ILMN_196941	LOC381284	9.66e-13	2.05332	XM_355224.1
ILMN_186391	Uqcrc2	9.76e-13	2.61477	NM_025899.2
ILMN_213684	Arhgef6	9.84e-13	1.90642	NM_152801.1
ILMN_212679	Cog2	9.93e-13	1.9588	NM_029746.2
ILMN_310009	2310014G06Rik	1e-12	2.03205	NM_001082975.1
ILMN_199761	LOC383897	1.02e-12	3.03508	XM_357315.1
ILMN_211197	2310039E09Rik	1.03e-12	-4.47747	NM_026509.1
ILMN_221050	Mif4gd	1.04e-12	2.71678	NM_027162.3
ILMN_219788	Abca7	1.04e-12	3.09324	NM_013850.1
ILMN_259434	Dync2li1	1.04e-12	-1.92606	NM_172256.1
ILMN_220588	Pdk4	1.07e-12	2.06258	NM_013743.2
ILMN_237843	Stap2	1.08e-12	4.2087	NM_145934.1
ILMN_209646	Rmnd1	1.08e-12	3.56755	NM_025343.3
ILMN_248084	Ndufa11	1.09e-12	3.38518	XM_924988.3
ILMN_212315	C430004E15Rik	1.12e-12	3.0342	NM_175286.3
ILMN_238130	Tspan14	1.12e-12	-2.51941	NM_145928.1
ILMN_213154	Reep6	1.12e-12	3.28076	NM_139292.1
ILMN_239194	Tead4	1.12e-12	-2.88205	NM_001080979.1
ILMN_256175	EG545758	1.18e-12	-1.98963	NM_001024147.1
ILMN_209457	Scx	1.18e-12	-3.39693	NM_198885.2
ILMN_213732	Tsfm	1.22e-12	3.57006	NM_025537.3
ILMN_248292	LOC638935	1.24e-12	-4.62876	XM_915139.3
ILMN_185100	1500017E21Rik	1.25e-12	-1.85713
ILMN_223033	Fbxo44	1.28e-12	2.904	NM_173401.2
ILMN_196910	LOC271697	1.3e-12	3.09835	XM_194683.2
ILMN_227461	Cnksr1	1.3e-12	-3.2675	NM_001081047.1
ILMN_225797	Ky	1.3e-12	2.09588	NM_024291.3
ILMN_228976	Myh3	1.31e-12	-4.87347	XM_908146.3
ILMN_219595	Tmem38b	1.33e-12	-3.30844	NM_028053.1
ILMN_217533	1700034H14Rik	1.37e-12	2.36433	NM_025969.3
ILMN_229578	Kbtbd5	1.37e-12	-2.66848	NM_028202.2
ILMN_244743	Tarbp2	1.38e-12	2.01897	NM_009319.1
ILMN_209496	D2Wsu81e	1.39e-12	2.35189	NM_172660.2
ILMN_209270	Gatad1	1.4e-12	2.19881	NM_026033.1
ILMN_201135	LOC382026	1.41e-12	-1.60537	XM_356096.1
ILMN_219398	Actn3	1.48e-12	-3.64184	NM_013456.1
ILMN_245521	Dlgap4	1.49e-12	-2.58908	NM_001042487.1
ILMN_218928	Tubb2c	1.52e-12	-2.05863	NM_146116.1
ILMN_219251	Cisd1	1.53e-12	2.00375	NM_134007.4
ILMN_248042	Znhit1	1.56e-12	2.29159	NM_027318.3
ILMN_221319	Pde10a	1.59e-12	3.39064	NM_011866.2
ILMN_201844	Mrpl15	1.59e-12	2.74886	AK017804
ILMN_253782	Ahnak	1.61e-12	-2.81774	NM_001039959.1
ILMN_236433	Amotl1	1.67e-12	-2.64191	NM_001081395.1
ILMN_211578	Nudt8	1.67e-12	2.66293	NM_025529.3
ILMN_254174	Ahnak2	1.71e-12	-2.33708	NM_001033476.1
ILMN_236981	Oxnad1	1.74e-12	2.96155	NM_145460.1
ILMN_218432	Slc25a12	1.75e-12	3.81342	NM_172436.2
ILMN_214872	Ddit3	1.77e-12	4.35318	NM_007837.2
ILMN_237937	Mrps12	1.78e-12	2.36679	NM_011885.3
ILMN_217710	Mkks	1.8e-12	2.82476	NM_021527.1
ILMN_230578	Rasgrp4	1.8e-12	3.90114	NM_145149.3
ILMN_234136	Mcee	1.84e-12	3.12424	NM_028626.1
ILMN_255003	Lonp1	1.85e-12	3.19622	NM_028782.2
ILMN_256242	Hspa2	1.86e-12	-2.60812	NM_001002012.1
ILMN_218536	Idh3b	1.87e-12	3.43831	NM_130884.3
ILMN_216610	Rab3a	1.87e-12	3.68271	NM_009001.3
ILMN_213079	Mtap4	1.9e-12	-5.17036	NM_008633.2
ILMN_212420	Rrad	1.9e-12	-3.40786	NM_019662.1
ILMN_244371	Rlf	1.9e-12	-1.85413	NM_001081013.1
ILMN_220901	Acy3	1.92e-12	12.4891	NM_027857.3
ILMN_257523	Slc25a35	1.93e-12	1.91694	NM_028048.2
ILMN_213068	Cox10	1.93e-12	2.95775	NM_178379.2
ILMN_221369	Hagh	1.94e-12	6.03483	NM_024284.1
ILMN_216146	Sccpdh	1.95e-12	-2.12358	NM_178653.3
ILMN_215421	Gprc5c	1.96e-12	-3.67773	NM_147217.2
ILMN_242863	Fh1	1.96e-12	3.68258	NM_010209.1
ILMN_190946	B230107K20Rik	1.97e-12	2.03325
ILMN_188558	Urod	1.97e-12	2.46733	NM_009478.3
ILMN_220158	Cish	1.99e-12	3.97809	NM_009895.3
ILMN_216005	Hemk1	2.04e-12	2.37817	NM_133984.1
ILMN_239396	Prmt2	2.09e-12	-2.79017	NM_001077638.1
ILMN_217622	Tymp	2.1e-12	3.03436	NM_138302.1
ILMN_222071	Mrpl34	2.1e-12	3.62393	NM_053162.2
ILMN_211491	Gpha2	2.11e-12	-2.00879	NM_130453.2
ILMN_233165	Omp	2.11e-12	1.75824	NM_011010.2
ILMN_230382	Qrsl1	2.12e-12	2.48561	NM_001081054.2
ILMN_213852	Idh3g	2.13e-12	2.14105	NM_008323.1
ILMN_210798	Fabp3	2.2e-12	3.0484	NM_010174.1
ILMN_220281	Alkbh6	2.2e-12	2.17546	NM_198027.2
ILMN_210141	Flad1	2.23e-12	2.56267	NM_177041.3
ILMN_195167	2810026P18Rik	2.23e-12	-1.99049
ILMN_247154	Sort1	2.26e-12	-3.17903	NM_019972.2
ILMN_238823	Klc4	2.28e-12	3.05196	NM_029091.2
ILMN_246267	Abhd14b	2.29e-12	2.78269	NM_029631.2
ILMN_208650	Mrps27	2.29e-12	3.8165	NM_173757.3
ILMN_215573	Scml4	2.33e-12	-3.97889	NM_172938.2
ILMN_196437	1300010F03Rik	2.36e-12	1.98184	XM_127737.3
ILMN_193235	Tmem25	2.38e-12	3.42831	NM_027865.1
ILMN_222077	Fst	2.41e-12	-5.56937	NM_008046.2
ILMN_212004	Gpr20	2.44e-12	-3.43618	NM_173365.2
ILMN_231319	Cbfa2t3h	2.5e-12	-2.54433	NM_009824.1
ILMN_188938	Dlst	2.55e-12	2.79403	NM_030225
ILMN_227464	1810043G02Rik	2.61e-12	2.31966	NM_026431.2
ILMN_201570	Padi2	2.61e-12	-3.20483	NM_008812.1
ILMN_218529	Ppm1f	2.64e-12	-1.50398	NM_176833.2
ILMN_219306	Ebp	2.64e-12	-3.32549	NM_007898.2
ILMN_220225	Dusp13	2.68e-12	-2.23983	NM_013849.3
ILMN_213331	Pop5	2.72e-12	2.2045	NM_026398.2
ILMN_226905	Rilp	2.73e-12	2.10206	NM_001029938.1
ILMN_212287	Ankrd10	2.73e-12	-2.89551	NM_133971.1
ILMN_220114	Polrmt	2.8e-12	2.87843	NM_172551.2
ILMN_208757	Timm44	2.8e-12	3.18675	NM_011592.1
ILMN_209313	Gfm1	2.82e-12	3.5872	NM_138591.1
ILMN_234838	Amy2-2	2.84e-12	2.27945	NM_001042711.2
ILMN_233313	Klhl30	2.87e-12	-3.44089	NM_027551.2
ILMN_213030	Rtn2	2.93e-12	-3.80101	NM_013648.5
ILMN_208811	Htr2b	2.93e-12	-2.07073	NM_008311.2
ILMN_220088	Ndufb7	2.93e-12	3.85652	NM_025843.3
ILMN_214234	Aldh3b1	2.96e-12	-2.563	NM_026316.2
ILMN_213892	Fastkd1	2.96e-12	2.97608	NM_177244.3
ILMN_220553	Mospd1	3.01e-12	-2.19754	NM_027409.3
ILMN_209086	Sdhb	3.04e-12	3.60854	NM_023374.3
ILMN_220222	Mfn1	3.04e-12	2.74133	NM_024200.2
ILMN_209630	Pcdh1	3.12e-12	-2.21375	NM_029357.3
ILMN_214391	Smpd1	3.15e-12	3.17621	NM_011421.1
ILMN_216899	A2bp1	3.17e-12	-3.81623	NM_021477.2
ILMN_217516	Ccdc134	3.19e-12	-3.32317	NM_172428.2
ILMN_213396	Mapk12	3.22e-12	-2.82748	NM_013871.2
ILMN_215863	Zfp691	3.27e-12	2.43569	NM_183140.1
ILMN_325030	LOC100046003	3.36e-12	2.29627	XM_001475465.1
ILMN_211291	Serhl	3.37e-12	3.08036	NM_023475.2
ILMN_260058	Rsad1	3.48e-12	3.83025	NM_001013381.1
ILMN_217201	Enc1	3.48e-12	-1.91638	NM_007930.3
ILMN_237160	Got2	3.51e-12	2.10667	NM_010325.2
ILMN_242106	Parl	3.54e-12	2.16213	NM_001005767.1
ILMN_216641	Timm10	3.55e-12	2.4321	NM_013899.1
ILMN_223596	Mdh2	3.56e-12	3.47344	NM_008617.2
ILMN_216839	Fam158a	3.56e-12	2.56738	NM_033146.1
ILMN_211327	E030027L17	3.57e-12	2.12045	NM_183300.1
ILMN_196722	Hist1h4f	3.57e-12	-2.35282	NM_175655.1
ILMN_240402	Zfp428	3.61e-12	2.92889	NM_146183.1
ILMN_223034	Hn1	3.65e-12	-2.18841	NM_008258.1
ILMN_202714	3000003G13Rik	3.71e-12	2.57053	AK019042
ILMN_201655	1110068E08Rik	3.74e-12	1.99822	AK004405
ILMN_239129	Coq9	3.74e-12	2.57594	NM_026452.2
ILMN_214188	Spsb3	3.78e-12	2.38541	NM_027141.1
ILMN_220690	Atp5d	3.79e-12	2.052	NM_025313.1
ILMN_224140	Ei24	3.8e-12	-2.39192	NM_007915
ILMN_214676	Clic3	3.9e-12	-3.02007	NM_027085.3
ILMN_228108	Ipo9	3.96e-12	-2.27806	NM_153774.1
ILMN_211374	L2hgdh	3.96e-12	3.47891	NM_145443.1
ILMN_218177	Tgm2	3.99e-12	-2.98194	NM_009373.3
ILMN_230098	Guk1	4.06e-12	2.30221	NM_008193.2
ILMN_227206	Nbl1	4.06e-12	-2.1192	NM_008675.1
ILMN_213671	Ptges2	4.11e-12	3.57236	NM_133783.1
ILMN_211039	Casp1	4.11e-12	-2.22406	NM_009807.2
ILMN_252583	Tmem129	4.13e-12	1.87782	NM_026698.2
ILMN_212504	Sh3rf1	4.15e-12	-3.63555	NM_021506.2
ILMN_225556	Alkbh3	4.29e-12	2.09316	NM_026944.1
ILMN_222600	Mrps9	4.35e-12	3.48972	NM_023514.3
ILMN_220146	Chn2	4.37e-12	-1.91282	NM_023543.1
ILMN_210631	Rnf11	4.37e-12	-2.12243	NM_013876.3
ILMN_259827	1500011H22Rik	4.43e-12	2.40758	NM_026883.1
ILMN_223230	1700021F05Rik	4.44e-12	2.5938	NM_026411.1
ILMN_210915	Spr	4.49e-12	2.66524	NM_011467.1
ILMN_211734	Epb4.1l3	4.49e-12	-1.78836	NM_013813.1
ILMN_251331	Cdc14b	4.5e-12	2.43105	NM_172587.2
ILMN_220818	Pgp	4.5e-12	2.41527	NM_025954.3
ILMN_249397	Limch1	4.54e-12	-2.45895	NM_001001980.2
ILMN_217091	Gloxd1	4.6e-12	4.25677	NM_146256.2
ILMN_210959	Pmm1	4.79e-12	2.91962	NM_013872.2
ILMN_209827	Igh-6	4.83e-12	-3.28195	XM_354710.1
ILMN_220521	Mrps31	4.87e-12	1.92081	NM_020560.1
ILMN_220751	Rpp21	4.89e-12	2.38309	NM_026308.2
ILMN_220888	Rcan2	4.92e-12	2.13247	NM_207649.1
ILMN_212241	Tlcd1	4.93e-12	2.76656	NM_026708.1
ILMN_206193	Gpld1	4.94e-12	2.32088	AK081107
ILMN_220180	Ndufc2	5e-12	2.33459	NM_024220.1
ILMN_217805	Cryab	5.01e-12	-2.56007	NM_009964.1
ILMN_240594	AB182283	5.03e-12	2.29053	NM_001081652.1
ILMN_213592	Csrnp2	5.19e-12	-2.32722	NM_153407.2
ILMN_215065	Lmf1	5.23e-12	2.33371	NM_029624.2
ILMN_190282	Prkag3	5.47e-12	-4.25819	NM_153744
ILMN_188994	A830080H07Rik	5.5e-12	-2.43545
ILMN_190215	1700026D08Rik	5.59e-12	2.36348	NM_029335
ILMN_211651	Socs3	5.72e-12	-2.13022	NM_007707.2
ILMN_213275	Brp17	5.77e-12	2.66418	NM_019999.1
ILMN_260547	2300002D11Rik	5.82e-12	2.70957	NM_001081156.1
ILMN_226601	Dip2c	5.86e-12	-1.73646	NM_001081426.1
ILMN_224594	Tsc22d2	5.9e-12	-1.96341	NM_001081229.1
ILMN_188309	Trmu	5.92e-12	2.24416	NM_028063.2
ILMN_222933	Casq2	5.93e-12	-3.84806	NM_009814.1
ILMN_245190	Ndufa10	6e-12	2.368	NM_024197.1
ILMN_184823	Acacb	6.03e-12	3.42973	NM_133904
ILMN_211122	Coq5	6.04e-12	5.79758	NM_026504.1
ILMN_257962	Gga2	6.1e-12	-2.82997	NM_028758.2
ILMN_218965	Adk	6.16e-12	2.48343	NM_134079.1
ILMN_240120	Ktelc1	6.29e-12	-2.26538	NM_172380.3
ILMN_220148	Tubb6	6.29e-12	-3.94407	NM_026473.2
ILMN_241009	Exoc1	6.35e-12	-1.52918	NM_027270.1
ILMN_212298	Pcolce	6.48e-12	2.42038	NM_008788.2
ILMN_215181	Adck1	6.5e-12	2.42206	NM_028105.3
ILMN_244624	Mrps5	6.55e-12	3.26612	NM_029963.2
ILMN_202529	2210010B09Rik	6.65e-12	1.6077	AK008693
ILMN_204282	9630007E23Rik	6.87e-12	1.88719	AK035814
ILMN_215509	Osbpl1a	6.92e-12	3.22095	NM_207530.2
ILMN_234915	Myl2	6.96e-12	-3.49082	NM_010861.3
ILMN_212071	1700088E04Rik	6.96e-12	1.89202	NM_138581.2
ILMN_216961	Drg2	6.97e-12	1.7953	NM_021354.1
ILMN_213603	Slc25a26	7.05e-12	2.5837	NM_026255.4
ILMN_217035	Tmem70	7.13e-12	2.83267	NM_027415.2
ILMN_235154	Psg23	7.2e-12	2.64331	NM_020261.2
ILMN_223502	Oma1	7.25e-12	1.78189	NM_025909.3
ILMN_237838	Ndufv2	7.33e-12	2.21788	NM_028388.1
ILMN_217079	Rusc1	7.34e-12	1.83006	NM_028188.1
ILMN_212893	Twf2	7.83e-12	3.23464	NM_011876.3
ILMN_185764	Plod3	7.85e-12	2.4003
ILMN_186461	Trim32	7.94e-12	-2.035	NM_053084.1
ILMN_212457	Fxc1	8.17e-12	2.54945	NM_019502.2
ILMN_239160	D12Ertd647e	8.21e-12	2.86864	NM_194068.1
ILMN_223649	Mrps26	8.39e-12	3.14577	NM_207207.1
ILMN_187772	4930470O13Rik	8.44e-12	2.17138
ILMN_253931	Scamp1	8.48e-12	-1.8273	NM_029153.1
ILMN_186676	scl0004175.1_57	8.53e-12	-1.70013	BC026739.1
ILMN_213534	Atp2a3	8.84e-12	4.78552	NM_016745.2
ILMN_214321	D11Lgp2e	8.85e-12	2.20681	BC029209
ILMN_231519	Zbtb8os	8.94e-12	1.7708	NM_025970.1
ILMN_213562	Prdx2	8.96e-12	2.35578	NM_011563.2
ILMN_322786	LOC100047674	9.05e-12	-2.15261	XM_001478657.1
ILMN_214836	Hsd11b1	9.11e-12	-2.66561	NM_008288.2
ILMN_210459	Egln3	9.15e-12	-3.89565	NM_028133.1
ILMN_216702	Cacnb1	9.23e-12	-3.32132	NM_031173.1
ILMN_210754	Ckm	9.45e-12	-5.01629	NM_007710.2
ILMN_211248	Pex16	9.51e-12	2.75959	NM_145122.1
ILMN_201556	Rangrf	9.52e-12	2.75515	NM_021329.2
ILMN_220819	Bckdha	9.58e-12	2.90714	NM_007533.4
ILMN_212280	Chchd4	9.61e-12	3.10819	NM_133928.2
ILMN_210173	Rnase4	9.62e-12	-2.62366	NM_021472.3
ILMN_214332	Mtx1	9.63e-12	2.60331	NM_013604.1
ILMN_256858	Akirin1	9.67e-12	-2.16455	NM_023423.3
ILMN_190448	Tnik	9.69e-12	-1.57589	XM_130797
ILMN_211763	Prnp	9.91e-12	-2.55009	NM_011170.1
ILMN_209371	Slc44a4	9.93e-12	-3.42809	NM_023557.2
ILMN_213692	Apob48r	1.01e-11	1.86425	NM_138310.1
ILMN_221173	Tmem48	1.01e-11	2.33241	NM_028355.3
ILMN_243863	2410131K14Rik	1.03e-11	2.18287	NM_001081236.1
ILMN_260765	Epb4.9	1.03e-11	2.06899	NM_013514.2
ILMN_213484	Fkbp9	1.04e-11	-2.03451	NM_012056.1
ILMN_218238	Alkbh7	1.05e-11	3.21259	NM_025538.2
ILMN_255382	Ndufb8	1.1e-11	1.94961	NM_026061.2
ILMN_235356	Ehd4	1.11e-11	-2.19763	NM_133838.4
ILMN_240032	Wipf3	1.11e-11	2.54084	XM_620310.4
ILMN_208729	Dcun1d4	1.11e-11	-1.88716	NM_178896.4
ILMN_257708	Tsc22d3	1.11e-11	-2.52227	NM_001077364.1
ILMN_211707	Supv3l1	1.14e-11	2.65072	NM_181423.2
ILMN_324495	LOC100045780	1.14e-11	-3.26592	XM_001475019.1
ILMN_217651	Chrnb1	1.17e-11	-3.12217	NM_009601.3
ILMN_238314	Vasn	1.18e-11	-2.10385	NM_139307.2
ILMN_210185	Nt5c3	1.19e-11	2.35957	NM_026004.2
ILMN_216778	Amn	1.21e-11	2.55773	NM_033603.2
ILMN_236440	Copg	1.22e-11	2.54242	NM_201244.1
ILMN_232490	Zeb1	1.27e-11	-2.05756	NM_011546.2
ILMN_217534	Lrrc24	1.28e-11	1.98833	NM_198119.2
ILMN_226483	Bglap2	1.28e-11	-3.62171	NM_001032298.2
ILMN_211089	Mak10	1.29e-11	1.84072	NM_030153.1
ILMN_213662	Dhrs1	1.31e-11	2.36089	NM_026819.2
ILMN_222338	Hspb3	1.32e-11	-2.69159	NM_019960.1
ILMN_192993	Txn2	1.33e-11	2.18425	NM_019913.5
ILMN_310888	LOC100041835	1.33e-11	2.7046	XM_001478119.1
ILMN_215368	Acsf3	1.33e-11	1.89186	NM_144932.3
ILMN_225614	Cables2	1.34e-11	1.79959	NM_145851.2
ILMN_220187	Elavl3	1.35e-11	2.02068	NM_010487.1
ILMN_209642	Igf2	1.35e-11	-1.91835	NM_010514.2
ILMN_213189	Prrg2	1.36e-11	1.88875	NM_022999.1
ILMN_220871	D10Ertd322e	1.38e-11	2.38449	NM_026065.2
ILMN_225832	1810015A11Rik	1.38e-11	2.29294	NM_026940.1
ILMN_188851	Shmt1	1.38e-11	2.13618	NM_009171
ILMN_238591	Dysfip1	1.39e-11	-1.62866	NM_026814.3
ILMN_225105	Hint2	1.39e-11	2.20457	NM_026871.1
ILMN_220660	Ptgis	1.4e-11	-3.41188	NM_008968.3
ILMN_216607	Sigirr	1.41e-11	1.63555	NM_023059.3
ILMN_194471	Zadh2	1.41e-11	3.21976	NM_146090.4
ILMN_234204	LOC676724	1.41e-11	2.1956	XM_992449.1
ILMN_215594	Pycr2	1.43e-11	-1.8409	NM_133705.1
ILMN_196518	AI448196	1.49e-11	-2.7328	XM_136041.3
ILMN_220126	Mrps18a	1.49e-11	3.08506	NM_026768.3
ILMN_185934	Xbp1	1.49e-11	-2.76379	NM_013842.2
ILMN_215119	Mrps34	1.52e-11	3.14167	NM_023260.1
ILMN_218286	Slc25a39	1.52e-11	2.51549	NM_026542.1
ILMN_226965	Sgk3	1.52e-11	2.90144	NM_133220.2
ILMN_211370	Gale	1.52e-11	2.72249	NM_178389.3
ILMN_232240	EG330503	1.59e-11	2.30429	NM_001033540.1
ILMN_192926	1110003F05Rik	1.61e-11	-2.20302
ILMN_231998	Dnajc28	1.62e-11	2.60592	NM_138664.2
ILMN_210872	Mrpl10	1.64e-11	2.03684	NM_026154.1
ILMN_196647	D330001F17Rik	1.65e-11	3.58841	XM_283282.2
ILMN_218564	Atad3a	1.65e-11	2.90408	NM_179203.1
ILMN_221159	Anxa6	1.65e-11	-1.91667	NM_013472.2
ILMN_219656	Mrps30	1.68e-11	2.80999	NM_021556.3
ILMN_201861	Gfm	1.69e-11	3.12485	AK018125
ILMN_247290	Clec16a	1.7e-11	2.863	NM_177562.4
ILMN_210685	Tmem143	1.7e-11	2.30117	NM_144801.1
ILMN_221948	Mrps2	1.71e-11	2.81271	NM_080452.2
ILMN_221308	Tlr2	1.72e-11	-2.94906	NM_011905.2
ILMN_216283	2310009E04Rik	1.74e-11	-2.58245	XM_131496.4
ILMN_252972	EG432436	1.77e-11	1.67236	NM_001004162.1
ILMN_261854	5133401N09Rik	1.78e-11	3.1389	NM_198004.2
ILMN_234959	Msl2l1	1.8e-11	-2.70121	XM_150227.8
ILMN_234742	Xpnpep3	1.82e-11	2.19001	NM_177310.2
ILMN_251186	Sh3bp2	1.84e-11	-2.34056	NM_011893.2
ILMN_202429	Mapbpip-pending	1.85e-11	2.42665	AK008185
ILMN_195261	Tlr6	1.88e-11	-1.8444	NM_011604.2
ILMN_236015	Ldb3	1.88e-11	-3.10413	NM_001039076.2
ILMN_214889	2010005J08Rik	1.88e-11	1.96922	NM_178623.2
ILMN_254439	Sox12	1.9e-11	2.63885	NM_011438.2
ILMN_193137	scl0002791.1_134	1.92e-11	2.18023
ILMN_221803	Gzmm	1.93e-11	1.95913	NM_008504.2
ILMN_240431	Polr2e	1.95e-11	3.15821	NM_025554.2
ILMN_217635	Rgs9bp	1.97e-11	2.14027	NM_145840.3
ILMN_224724	Prdx5	2.01e-11	2.6297	NM_012021.2
ILMN_209500	Grasp	2.04e-11	-2.11646	NM_019518.2
ILMN_207079	Atp5f1	2.04e-11	1.55672	AK081249
ILMN_318712	LOC100048313	2.07e-11	2.5549	XM_001480281.1
ILMN_212326	Fzd7	2.11e-11	-2.6352	NM_008057.2
ILMN_213159	Gde1	2.17e-11	2.29634	NM_019580.4
ILMN_213245	Srl	2.18e-11	-3.70242	NM_175347.4
ILMN_210911	Serpinb9g	2.18e-11	-3.97113	NM_011455.2
ILMN_221894	P2rx5	2.18e-11	-2.38531	NM_033321.1
ILMN_211889	Ctps	2.19e-11	-2.50545	NM_016748.1
ILMN_208715	Thap11	2.2e-11	1.55021	NM_021513.1
ILMN_216322	BC065085	2.22e-11	-2.37518	NM_177628.3
ILMN_228863	Cdh13	2.23e-11	-3.50727	NM_019707.4
ILMN_254690	Hoxc9	2.24e-11	-2.38107	NM_008272.3
ILMN_184886	Vps33b	2.25e-11	1.57243	NM_178070.3
ILMN_217880	Ndufs7	2.26e-11	2.28876	NM_029272.3
ILMN_211997	Smtn	2.31e-11	-2.9806	NM_013870.1
ILMN_219320	Hhatl	2.35e-11	2.64945	NM_029095.1
ILMN_260938	LOC669660	2.35e-11	-3.66453	XM_976375.1
ILMN_217480	Suclg1	2.37e-11	3.58971	NM_019879.2
ILMN_223198	Ctrb1	2.4e-11	-2.75919	NM_025583.1
ILMN_315729	LOC100040525	2.4e-11	-2.23828	XR_031953.1
ILMN_222663	Fam125a	2.41e-11	2.18268	NM_028617.2
ILMN_236550	Gm484	2.42e-11	-3.25027	NM_001033356.2
ILMN_213741	Dusp6	2.42e-11	-1.84138	NM_026268.1
ILMN_188502	Abhd11	2.44e-11	2.84255	NM_145215.1
ILMN_218013	Jakmip1	2.45e-11	-1.64491	NM_178394.3
ILMN_226523	Gnpda1	2.46e-11	1.71867	NM_011937.1
ILMN_222979	Eno3	2.46e-11	-2.41284	NM_007933.2
ILMN_214036	Angptl6	2.46e-11	2.52906	NM_145154
ILMN_205868	C130008L17Rik	2.49e-11	-1.53033	AK047852
ILMN_216640	Fdxr	2.51e-11	2.4049	NM_007997.1
ILMN_208959	Cpne2	2.52e-11	-4.12949	NM_153507.2
ILMN_202862	6330403E01Rik	2.56e-11	-2.61455	AK031808
ILMN_202021	1700022J01Rik	2.56e-11	1.67265	AK006243
ILMN_250037	2700094K13Rik	2.57e-11	-2.08338	NM_001037279.1
ILMN_211231	Mgst2	2.58e-11	-2.32312	NM_174995.2
ILMN_209922	1810014F10Rik	2.58e-11	3.96284	NM_026928.2
ILMN_215889	Slc25a20	2.59e-11	2.39501	NM_020520.2
ILMN_223571	5730472N09Rik	2.61e-11	2.5042	NM_175392.3
ILMN_221567	Lars2	2.61e-11	1.79345	NM_153168.2
ILMN_214398	Samd8	2.66e-11	-3.17465	NM_026283.2
ILMN_217714	Mrps7	2.69e-11	2.41655	NM_025305.1
ILMN_316341	LOC626152	2.8e-11	2.2864	XR_032670.1
ILMN_218198	C030006K11Rik	2.81e-11	3.11784	NM_145472.1
ILMN_222947	Prc1	2.82e-11	-2.5385	NM_145150.1
ILMN_212355	Zfp672	2.87e-11	2.46773	NM_178761.3
ILMN_218673	Dcakd	2.87e-11	-1.95773	NM_026551.3
ILMN_313908	LOC624662	2.92e-11	-1.98064	XR_033663.1
ILMN_190979	2700049H19Rik	2.94e-11	1.56307
ILMN_212759	Fzr1	3.05e-11	2.1383	NM_019757.1
ILMN_250999	Gnal1	3.12e-11	1.84758	NM_008136.2
ILMN_220791	Blnk	3.13e-11	1.70011	NM_008528.4
ILMN_218744	Suox	3.13e-11	2.05659	NM_173733.2
ILMN_217677	Hisppd2a	3.14e-11	2.14549	NM_178795.3
ILMN_248058	Ggnbp1	3.15e-11	1.81486	NM_027544.1
ILMN_190694	Traf4	3.16e-11	-1.76592	NM_009423.2
ILMN_217384	Osbpl2	3.16e-11	2.02805	NM_144500.3
ILMN_208825	Tbrg4	3.18e-11	2.51626	NM_134011.1
ILMN_200109	LOC384206	3.19e-11	1.84728	XM_357488.1
ILMN_239986	Aifm2	3.19e-11	1.8811	NM_001039194.2
ILMN_209844	6030419C18Rik	3.2e-11	-2.39821	NM_176921.2
ILMN_215032	Gp38	3.21e-11	-1.98995	NM_010329.1
ILMN_217335	2900073G15Rik	3.21e-11	-2.72168	NM_026064.1
ILMN_210910	Higd2a	3.22e-11	2.3589	NM_025933.3
ILMN_208930	Abcb8	3.26e-11	2.25002	NM_029020.2
ILMN_214133	Cox4nb	3.27e-11	2.50878	NM_010926.4
ILMN_223175	BC003965	3.3e-11	2.1688	XM_128528.2
ILMN_219902	Sar1b	3.3e-11	2.24648	NM_025535.1
ILMN_191490	Zhx1	3.34e-11	-2.02326	NM_009572.3
ILMN_250069	Zmynd17	3.35e-11	-3.90053	XM_907249.2
ILMN_249971	Timm9	3.36e-11	1.90731	NM_013896.3
ILMN_225790	Nr1h2	3.39e-11	2.10021	NM_009473.2
ILMN_212856	Slc10a4	3.39e-11	-2.88919	NM_173403.2
ILMN_218719	1190005I06Rik	3.41e-11	2.19783	NM_197988.1
ILMN_207470	Kif1b	3.43e-11	-2.92377	NM_008441.1
ILMN_188171	Vegfb	3.44e-11	2.8568	NM_011697.2
ILMN_313274	LOC100047135	3.47e-11	2.0019	XM_001478025.1
ILMN_195697	4930402E16Rik	3.48e-11	2.76543	NM_198308
ILMN_220429	Eif2b4	3.49e-11	2.55714	NM_010122.1
ILMN_222273	Cd82	3.5e-11	-2.15552	NM_007656.4
ILMN_202001	Gng12	3.51e-11	-2.1442	AK005561
ILMN_184505	Tuft1	3.54e-11	-2.34341	NM_011656.2
ILMN_245192	Rbms2	3.55e-11	-1.78619	NM_001039080.1
ILMN_233010	6430514L14Rik	3.58e-11	1.58939	NM_029784.2
ILMN_222999	Armc10	3.59e-11	-2.16052	NM_026034.3
ILMN_212382	Rhobtb2	3.62e-11	-2.977	NM_153514.3
ILMN_184385	Tmem9	3.67e-11	-2.07911	NM_025439.2
ILMN_222254	Aldh3b2	3.73e-11	2.07219	XM_129134.7
ILMN_261388	Rwdd1	3.76e-11	1.98719	NM_025614.1
ILMN_224538	Cdc42ep3	3.77e-11	-3.03918	NM_026514.2
ILMN_223779	Dscr2	3.81e-11	1.54762	NM_019537.1
ILMN_221277	Endod1	3.83e-11	-1.74372	NM_028013.2
ILMN_239393	Bin1	3.89e-11	-3.0301	NM_009668.1
ILMN_211493	Cox6b1	3.91e-11	1.93625	NM_025628.2
ILMN_210085	Nme4	3.91e-11	-1.98207	NM_019731.1
ILMN_211586	Flot2	3.94e-11	-1.54443	NM_008028.2
ILMN_215671	Bace1	3.96e-11	-2.30169	NM_011792.4
ILMN_257205	Ndufs3	3.98e-11	1.98066	NM_026688.2
ILMN_261063	Cdc25a	4e-11	1.61114	NM_007658.3
ILMN_222300	Hat1	4e-11	2.39753	NM_026115.3
ILMN_219332	Fgf13	4.06e-11	-2.70587	NM_010200.2
ILMN_184684	Tomm40	4.12e-11	3.37309	NM_016871
ILMN_236003	Klf5	4.14e-11	-3.77157	NM_009769.4
ILMN_216061	Atp2a1	4.16e-11	-2.5183	NM_007504.2
ILMN_216697	Gldc	4.23e-11	-2.25579	NM_138595.1
ILMN_222607	Mrps28	4.25e-11	2.68487	NM_025434.2
ILMN_239733	Fbxw7	4.31e-11	-2.08676	NM_080428.2
ILMN_222392	Tgfb3	4.33e-11	-3.12017	NM_009368.2
ILMN_220480	Slc25a28	4.33e-11	2.99913	NM_145156.1
ILMN_210866	Fxyd6	4.35e-11	-2.97671	NM_022004.6
ILMN_185456	Trim41	4.37e-11	2.43049	NM_145377.1
ILMN_212301	Ndufs4	4.41e-11	1.56988	NM_010887.1
ILMN_211435	Ctsf	4.43e-11	2.75926	NM_019861.1
ILMN_215456	Mrpl18	4.44e-11	4.11754	NM_026310.3
ILMN_319923	LOC100047762	4.44e-11	4.47695	XM_001478835.1
ILMN_223172	Poldip2	4.45e-11	2.57145	NM_026389.3
ILMN_196144	Tusc2	4.47e-11	1.61169	NM_019742.2
ILMN_213635	Esrrb	4.53e-11	2.1982	NM_011934.3
ILMN_210275	Stk17b	4.54e-11	-2.69381	NM_133810.2
ILMN_232691	Fkbp4	4.62e-11	2.55166	NM_010219.3
ILMN_185662	4631426J05Rik	4.67e-11	-1.55281	NM_029935
ILMN_235860	Zfp277	4.68e-11	-2.25544	NM_178845.1
ILMN_229854	Cnih4	4.69e-11	1.90933	NM_030131.2
ILMN_216260	Mad2l1bp	4.72e-11	1.79691	NM_025649.2
ILMN_221784	Slc31a1	4.78e-11	2.44253	NM_175090.3
ILMN_216676	Cdc37l1	4.8e-11	1.91189	NM_025950.2
ILMN_209991	Abcd1	4.82e-11	2.38796	NM_007435.1
ILMN_250560	Ciapin1	4.84e-11	2.52839	NM_134141.4
ILMN_219873	Cyb561	4.85e-11	2.20439	NM_007805.4
ILMN_212082	1700029P11Rik	4.86e-11	2.39911	NM_025503.1
ILMN_184866	Ttn	4.87e-11	-3.55208	XM_130322
ILMN_214091	Pank4	4.95e-11	1.87842	NM_172990.2
ILMN_218675	Aifm1	4.99e-11	2.70488	NM_012019.2
ILMN_214782	Osbpl3	5.09e-11	-2.77263	NM_027881.1
ILMN_201627	1110014J17Rik	5.09e-11	2.48286	AK003702
ILMN_320546	AI464131	5.1e-11	-1.96569	NM_001085515.1
ILMN_259192	Fads3	5.12e-11	-2.69813	NM_021890.3
ILMN_222555	1810063B05Rik	5.16e-11	2.88354	NM_174987.3
ILMN_210592	0910001A06Rik	5.18e-11	-3.09223	NM_144846.4
ILMN_202131	Capn10	5.2e-11	1.90878	AK013497
ILMN_189339	A930009M04Rik	5.21e-11	2.0977	NM_177266
ILMN_193548	1810009O10Rik	5.21e-11	2.4311	NM_197989
ILMN_218979	Ndufv1	5.22e-11	1.76765	NM_133666.2
ILMN_209558	D430028G21Rik	5.27e-11	2.82552	NM_144888.1
ILMN_221274	Anxa3	5.28e-11	-2.48096	NM_013470.1
ILMN_216699	Kcnb1	5.29e-11	-2.15395	NM_008420.3
ILMN_244748	Palld	5.29e-11	-2.39474	XM_974582.1
ILMN_193940	Panx1	5.29e-11	-2.61304	NM_019482
ILMN_210987	Extl3	5.33e-11	-2.16763	NM_018788.2
ILMN_222523	2210013O21Rik	5.37e-11	-1.61358	XM_489371
ILMN_220903	AI467606	5.4e-11	-2.08704	NM_178901.3
ILMN_218374	Sap30	5.44e-11	-2.67105	NM_021788.1
ILMN_216904	Glt8d1	5.47e-11	-1.6638	NM_029626.1
ILMN_236469	Bglap-rs1	5.59e-11	-2.89184	NM_031368.3
ILMN_253395	Psat1	5.6e-11	-2.04978	NM_177420.1
ILMN_218373	Myl1	5.61e-11	-3.83808	NM_021285.2
ILMN_213341	Osbpl5	5.63e-11	-2.42777	NM_024289
ILMN_213490	Cacna1s	5.71e-11	-3.40621	XM_358335.1
ILMN_210594	2310076L09Rik	5.76e-11	1.75737	NM_025874.3
ILMN_215885	Ppp1r16a	5.77e-11	2.32625	NM_033371.2
ILMN_211934	Sgca	5.83e-11	-2.69052	NM_009161.1
ILMN_210928	Cdh15	5.85e-11	-2.78652	NM_007662.2
ILMN_316153	Cars2	5.85e-11	2.60242	XM_001474115.1
ILMN_220055	Prdx4	5.86e-11	-2.07345	NM_016764.3
ILMN_217324	Atp2a2	5.89e-11	-2.6982	NM_009722.2
ILMN_236168	Sssca1	5.92e-11	2.33745	NM_020491.4
ILMN_233935	Tnni1	5.95e-11	-2.59191	NM_021467.4
ILMN_233249	Tomm7	6.02e-11	2.08236	NM_025394.2
ILMN_249661	Vamp5	6.06e-11	-4.08236	NM_001080742.1
ILMN_221979	Slc4a8	6.09e-11	2.71352	NM_021530.2
ILMN_218012	Tmem198	6.09e-11	1.69374	NM_177056.3
ILMN_247250	Sco1	6.13e-11	2.01007	NM_001040026.1
ILMN_254717	Cdr2l	6.21e-11	2.64267	NM_001080929.1
ILMN_241583	Aldh4a1	6.22e-11	2.12202	NM_175438.3
ILMN_211202	Lass5	6.22e-11	-2.27035	NM_028015.2
ILMN_248531	B930041F14Rik	6.23e-11	2.71914	NM_178699.3
ILMN_227163	Mylk2	6.25e-11	-2.1925	NM_001081044.1
ILMN_212209	Egr2	6.25e-11	-1.57307	NM_010118.1
ILMN_217704	Ard1a	6.32e-11	2.14466	NM_019870.2
ILMN_253907	Pdlim1	6.33e-11	-2.90728	NM_016861.3
ILMN_252914	1700007K13Rik	6.33e-11	1.83987	NM_027040.1
ILMN_218158	Adamtsl5	6.35e-11	-2.1901	NM_025629.2
ILMN_210745	Hadhb	6.39e-11	2.26399	NM_145558.1
ILMN_317292	LOC100047827	6.45e-11	-2.49493	XM_001479392.1
ILMN_218485	Atox1	6.54e-11	2.76367	NM_009720.2
ILMN_312362	LOC100044756	6.55e-11	2.08814	XM_001472989.1
ILMN_212686	Inpp4b	6.57e-11	-3.2589	XM_134427.3
ILMN_196752	H2-Q5	6.61e-11	-1.71577	NM_010393.1
ILMN_236727	Tmem158	6.73e-11	-2.64225	NM_001002267.2
ILMN_217575	Acot11	6.86e-11	2.16881	NM_025590.3
ILMN_223819	Bok	6.86e-11	-2.77804	NM_016778
ILMN_217092	Nrip3	6.88e-11	2.33985	NM_020610.1
ILMN_214268	Phb2	6.91e-11	3.36005	NM_007531.2
ILMN_215570	Maged1	6.91e-11	-2.01421	NM_019791.2
ILMN_242574	Ndufs6	6.96e-11	1.83846	NM_010888.1
ILMN_208728	Sars2	7e-11	2.37821	NM_023637.1
ILMN_210282	Nsun5	7.08e-11	2.24043	NM_145414.2
ILMN_218011	Tfb1m	7.09e-11	1.81156	NM_146074.1
ILMN_223357	Eno2	7.17e-11	-1.88629	NM_013509.2
ILMN_212396	Rai12	7.18e-11	1.83458	NM_018740.1
ILMN_215245	Anxa2	7.2e-11	-2.18694	NM_007585.3
ILMN_223314	Mrps23	7.22e-11	2.05818	NM_024174.4
ILMN_218833	Ppic	7.23e-11	-1.90532	NM_008908.3
ILMN_201857	6330404C01Rik	7.27e-11	-2.59299	AK018112
ILMN_210812	Atp10d	7.27e-11	2.72982	NM_153389.2
ILMN_253938	D230007K08Rik	7.3e-11	-2.43012	XM_980391.1
ILMN_210778	Mrpl40	7.33e-11	2.42766	NM_010922.1
ILMN_215455	Chchd7	7.35e-11	3.11726	NM_181391.2
ILMN_218343	Comt	7.35e-11	1.96061	XM_147265.1
ILMN_218007	Ruvbl2	7.36e-11	2.84626	NM_011304.3
ILMN_214579	2310036D04Rik	7.55e-11	2.24016	XM_488563
ILMN_194145	2310033F14Rik	7.59e-11	-2.26117
ILMN_222547	Urm1	7.6e-11	2.25823	NM_026615.4
ILMN_208782	Nqo2	7.75e-11	1.70319	NM_020282.2
ILMN_190146	scl000416.1_19	7.76e-11	2.24886	AK049709.1
ILMN_211922	Bhlhb2	7.81e-11	-2.60169	NM_011498.4
ILMN_218739	1190017O12Rik	7.83e-11	2.25639	NM_138743.2
ILMN_210198	Tfam	7.9e-11	2.3631	NM_009360.4
ILMN_224754	Ogfrl1	7.9e-11	-1.60464	XM_973033.1
ILMN_229700	Gm561	7.91e-11	1.9207	NM_001033297.2
ILMN_219447	Zfand2a	7.93e-11	-2.73135	NM_133349.2
ILMN_208890	H2-Bl	7.96e-11	1.92315	NM_008199.1
ILMN_190845	Vps18	7.98e-11	-1.68851	NM_172269.2
ILMN_217469	Arpp21	8.01e-11	-3.29819	NM_033264.1
ILMN_312506	LOC100046025	8.04e-11	-2.5581	XM_001475823.1
ILMN_217737	Fam129b	8.06e-11	-1.76021	NM_146119.1
ILMN_190885	Arfgef2	8.13e-11	1.97543	XM_130646
ILMN_209334	Myg1	8.17e-11	2.09579	NM_021713.2
ILMN_315585	Fam131c	8.19e-11	1.71111	NM_001085513.1
ILMN_210556	Popdc3	8.21e-11	-2.89752	NM_024286.1
ILMN_221193	Prdx3	8.33e-11	2.61658	NM_007452.1
ILMN_212409	Ppp1r3b	8.36e-11	2.22301	NM_177741.3
ILMN_253687	Mreg	8.48e-11	2.86054	NM_001005423.1
ILMN_213905	Ict1	8.5e-11	2.03668	NM_026729.1
ILMN_221706	Abhd5	8.57e-11	2.301	NM_026179.2
ILMN_210633	9430029K10Rik	8.58e-11	2.24757	XM_284281.2
ILMN_311490	LOC100046861	8.58e-11	1.59354	XM_001476495.1
ILMN_212388	2310016C16Rik	8.63e-11	-1.96419	NM_027127.1
ILMN_213620	Hspd1	8.64e-11	2.91976	NM_010477.3
ILMN_260267	Phkg2	8.67e-11	1.57855	NM_026888.2
ILMN_209347	Snapin	8.76e-11	-1.9044	NM_133854.2
ILMN_212056	Ephb2	8.78e-11	-1.72797	XM_204072.3
ILMN_217502	Macrod1	8.89e-11	2.56524	NM_134147.3
ILMN_212045	Gtpbp3	8.91e-11	1.75275	NM_032544.3
ILMN_211689	Prkd3	8.93e-11	-2.27684	NM_029239.2
ILMN_230372	Cstf3	8.98e-11	1.8242	NM_177253.1
ILMN_233981	Lmo7	9.05e-11	-3.17128	XM_895783.2
ILMN_210820	Cacng1	9.13e-11	-3.56365	NM_007582.2
ILMN_245215	Rftn2	9.14e-11	-2.31579	NM_028713.1
ILMN_222004	Gnb5	9.15e-11	1.99926	NM_138719.3
ILMN_221714	Prickle3	9.21e-11	-2.85982	NM_175097.3
ILMN_211923	A930010I20Rik	9.36e-11	-2.09216	NM_177857
ILMN_245276	Zfp238	9.38e-11	-2.00562	NM_001012330.1
ILMN_220776	D0H8S2298E	9.59e-11	1.50241	NM_178648.1
ILMN_221240	Ogfod2	9.62e-11	2.12102	NM_025671.1
ILMN_211154	6330578E17Rik	9.66e-11	1.76451	NM_198006.3
ILMN_210621	Abcd4	9.68e-11	2.06937	NM_008992.1
ILMN_243433	Chst13	9.7e-11	-1.59064	XM_994764.1
ILMN_255350	Sphk1	9.73e-11	-1.68757	NM_011451.2
ILMN_255124	Asb1	9.78e-11	1.92455	NM_023046.4
ILMN_233307	Mfap5	9.83e-11	-2.322	NM_015776.2
ILMN_253321	Fbxl6	9.85e-11	2.47373	NM_013909.1
ILMN_231496	2210011C24Rik	9.94e-11	-1.91181	XM_985599.1
ILMN_201956	0610011I19Rik	1.01e-10	2.00738	AK002548
ILMN_232017	Itga10	1.01e-10	-1.89874	NM_001081053.1
ILMN_245695	Ppm1k	1.02e-10	2.59482	NM_175523.4
ILMN_260122	Nras	1.03e-10	-3.2361	NM_010937.2
ILMN_215155	Dus1l	1.04e-10	1.93316	NM_026824.4
ILMN_210446	Lamp2	1.06e-10	-2.08363	NM_010685.3
ILMN_238063	Sh3pxd2b	1.08e-10	-1.82966	NM_177364.3
ILMN_190662	Zfp639	1.09e-10	1.9388	NM_144519
ILMN_227534	Erich1	1.09e-10	-1.77949	NM_001034862.1
ILMN_223171	Mrgprf	1.09e-10	-2.02363	NM_145379.2
ILMN_247252	Cox5a	1.09e-10	1.8943	NM_007747.2
ILMN_213909	Mycl1	1.1e-10	-1.96878	NM_008506.2
ILMN_257272	Kbtbd10	1.1e-10	-3.78073	NM_001081087.1
ILMN_187065	6530415H11Rik	1.1e-10	2.10998
ILMN_212539	Capn5	1.12e-10	2.09406	NM_007602.3
ILMN_228380	Oxa1l	1.13e-10	2.54683	NM_026936.3
ILMN_209874	Mcpt8	1.13e-10	-2.66562	NM_008572.1
ILMN_221376	Sh3bp5l	1.13e-10	1.83812	NM_024480.3
ILMN_319248	LOC100042179	1.14e-10	1.99618	XM_001477683.1
ILMN_216688	2310033P09Rik	1.15e-10	2.53546	NM_024210.2
ILMN_220232	Trmt1	1.15e-10	2.34582	NM_198020.1
ILMN_196396	1100001J08Rik	1.15e-10	1.62326	XM_126505.1
ILMN_229388	Dgkq	1.16e-10	2.3606	NM_199011.1
ILMN_223232	Hspb8	1.17e-10	-2.23899	NM_030704.1
ILMN_218428	Mcm4	1.19e-10	-2.00231	NM_008565.2
ILMN_210847	Chi3l1	1.2e-10	-2.0098	NM_007695.2
ILMN_228537	Pde4dip	1.2e-10	-2.79358	NM_001039376.1
ILMN_211628	Ppp3cc	1.21e-10	2.05573	NM_008915.2
ILMN_186935	Trpt1	1.22e-10	1.8454	NM_153597.1
ILMN_318141	LOC100046918	1.23e-10	2.95748	XM_001477065.1
ILMN_251877	Tfb2m	1.24e-10	2.27853	NM_008249.2
ILMN_218659	Smyd5	1.24e-10	1.74345	NM_144918.1
ILMN_259582	Nudt13	1.24e-10	2.51771	NM_026341.2
ILMN_212849	Ppap2b	1.26e-10	-2.13256	NM_080555.2
ILMN_214308	3110056O03Rik	1.26e-10	2.27674	NM_175195.3
ILMN_239767	Itgb1bp3	1.27e-10	-2.51385	NM_027120.2
ILMN_246563	Lmna	1.27e-10	-2.2033	NM_001002011.1
ILMN_219051	Stac2	1.29e-10	2.55984	NM_146028.4
ILMN_209646	0610042C05Rik	1.29e-10	2.16765	NM_025343.2
ILMN_209035	Pmm2	1.29e-10	1.94687	XM_147219.1
ILMN_210981	Atp5j	1.3e-10	2.13183	NM_016755.2
ILMN_223774	Fam107a	1.3e-10	-1.80412	NM_183187.3
ILMN_220177	Mto1	1.31e-10	2.08038	NM_026658.1
ILMN_211782	Arfip2	1.33e-10	2.23205	NM_029802.3
ILMN_191790	Tpm2	1.34e-10	-2.08959	NM_009416.3
ILMN_208792	Ubxn1	1.35e-10	1.65225	NM_146093.1
ILMN_216099	Srxn1	1.36e-10	2.52864	NM_029688.2
ILMN_208644	Bid	1.38e-10	-3.17128	NM_007544.3
ILMN_222672	Eif3s5	1.38e-10	-1.56313	NM_025344
ILMN_231393	Hk1	1.38e-10	3.19687	NM_010438.2
ILMN_225004	Gdf1	1.39e-10	-2.51912	NM_008107.3
ILMN_220697	Cnot6l	1.39e-10	-2.19081	NM_178854.3
ILMN_223948	2310044H10Rik	1.39e-10	1.83373	NM_197991
ILMN_245418	Pi4ka	1.4e-10	2.1974	NM_001001983.1
ILMN_245554	Ncam1	1.4e-10	-3.12264	NM_010875.3
ILMN_194821	Tspan6	1.4e-10	-2.06112	NM_019656.3
ILMN_189856	Unc119	1.41e-10	1.90104	NM_011676.2
ILMN_215419	Foxred1	1.42e-10	2.02888	NM_172291.1
ILMN_220650	Stac3	1.42e-10	-3.28683	NM_177707.3
ILMN_216202	1110008P14Rik	1.43e-10	2.31415	NM_198001.1
ILMN_210767	Rpn2	1.44e-10	-1.85811	NM_019642.3
ILMN_318899	LOC100044087	1.45e-10	3.96096	XR_034194.1
ILMN_193331	6330414G02Rik	1.46e-10	-2.82337
ILMN_210875	Mylc2b	1.46e-10	-2.31185	NM_023402.1
ILMN_189362	Wbscr16	1.47e-10	1.83063	NM_033572.1
ILMN_222218	Slc35b4	1.47e-10	-1.63779	NM_021435.3
ILMN_209151	C1qtnf3	1.47e-10	-1.92303	NM_030888.3
ILMN_221837	2810003C17Rik	1.48e-10	-2.77926	NM_145144.1
ILMN_236103	Cenpl	1.49e-10	-1.68213	NM_027429.2
ILMN_258004	Pole3	1.5e-10	1.9141	NM_021498.2
ILMN_216956	Hrmt1l2	1.52e-10	1.55601	NM_019830.1
ILMN_215683	Spnb2	1.52e-10	-2.23859	NM_009260.2
ILMN_194142	1110011C06Rik	1.52e-10	1.7074
ILMN_221434	Acox3	1.53e-10	2.55518	NM_030721.2
ILMN_222309	5031425E22Rik	1.55e-10	-1.83952	XM_149592.1
ILMN_208835	Arf2	1.58e-10	-1.66522	NM_007477.4
ILMN_212744	Hspa9	1.59e-10	2.47793	NM_010481.1
ILMN_250332	BC051019	1.61e-10	-2.27003	NM_001040700.2
ILMN_186356	mtDNA_ND2	1.63e-10	2.67527
ILMN_215302	Rhbdf1	1.65e-10	-2.03243	NM_010117.1
ILMN_219117	4930572J05Rik	1.67e-10	2.14258	NM_198607.1
ILMN_191670	Tnni2	1.67e-10	-2.09176	NM_009405.2
ILMN_210469	Stmn2	1.68e-10	-2.16406	NM_025285.2
ILMN_187288	6720458D17Rik	1.68e-10	-2.08142
ILMN_212166	Napa	1.69e-10	1.87315	NM_025898.3
ILMN_246006	Dhrs7c	1.7e-10	-1.93698	NM_001013013.1
ILMN_212204	Dexi	1.71e-10	1.66673	NM_021428.4
ILMN_219560	Ppap2a	1.71e-10	-2.49277	NM_008247.2
ILMN_211466	Sox11	1.72e-10	-3.07297	NM_009234.3
ILMN_249135	Dusp28	1.73e-10	2.10084	NM_175118.3
ILMN_209382	Tcn2	1.75e-10	2.51635	NM_015749.2
ILMN_209570	Mpnd	1.77e-10	2.45627	NM_026530.5
ILMN_221064	Tgfbr2	1.78e-10	-2.12211	NM_009371.2
ILMN_221229	Commd4	1.81e-10	-2.00851	NM_025417.1
ILMN_240997	5033413D22Rik	1.84e-10	-1.77209	NM_029493.2
ILMN_210789	Gcnt2	1.86e-10	-2.1178	NM_133219.1
ILMN_210268	Ttc39a	1.88e-10	1.7216	NM_153392.1
ILMN_217640	Banf1	1.9e-10	2.38584	NM_011793.2
ILMN_210879	rp9	1.93e-10	1.76766	NM_018739.1
ILMN_192187	Dtymk	1.93e-10	-1.51304	NM_023136
ILMN_194545	9330180L10Rik	1.96e-10	1.99433
ILMN_202718	0610010I05Rik	1.99e-10	2.11716	AK018737
ILMN_251267	Ccdc23	1.99e-10	-2.03745	NM_001038998.1
ILMN_223132	Lrrn1	2e-10	-3.59652	NM_008516.2
ILMN_209616	Chrna1	2.03e-10	-2.20595	NM_007389.4
ILMN_235377	Tmem107	2.04e-10	2.18997	NM_025838.1
ILMN_189771	Zfp275	2.05e-10	-2.18239	NM_031494.1
ILMN_228097	Cmya1	2.05e-10	-3.73934	XM_993589.1
ILMN_237906	Vdac1	2.09e-10	1.7609	NM_011694.3
ILMN_210312	Them2	2.09e-10	2.74049	NM_025790.1
ILMN_190340	Bicd2	2.09e-10	-2.4165	NM_029791
ILMN_252128	Wdr68	2.09e-10	1.70003	NM_027946.3
ILMN_192424	Tram1	2.11e-10	-1.80047	NM_028173.3
ILMN_216043	Anxa11	2.11e-10	-3.25912	NM_013469.1
ILMN_245439	Cd44	2.12e-10	-2.82842	NM_001039150.1
ILMN_244898	BC003940	2.13e-10	-1.81317	NM_001033231.2
ILMN_209674	Emp2	2.13e-10	-2.14345	NM_007929.2
ILMN_217684	Sult2b1	2.14e-10	-1.63506	NM_017465.1
ILMN_219182	Dus3l	2.16e-10	1.72699	NM_144858.1
ILMN_223549	Islr2	2.16e-10	1.87681	NM_177193.4
ILMN_222934	Trim54	2.18e-10	-2.22976	NM_021447.1
ILMN_196774	Klk1b27	2.19e-10	1.83016	NM_020268.3
ILMN_227594	Peg3	2.19e-10	-2.57049	NM_008817.2
ILMN_218121	Lyrm5	2.21e-10	1.87935	NM_133688.2
ILMN_237612	Tpm4	2.22e-10	-1.95373	NM_001001491.1
ILMN_239601	Klk1b22	2.23e-10	2.99124	NM_010114.1
ILMN_226304	Cmc1	2.26e-10	1.98664	NM_026442.2
ILMN_228879	2210409D07Rik	2.28e-10	-1.72178	XM_923487.2
ILMN_223787	4930455F23Rik	2.28e-10	-1.79301	NM_029115
ILMN_246290	Cpeb3	2.29e-10	1.69098	NM_198300.2
ILMN_219576	Fgf21	2.29e-10	-2.39662	NM_020013.4
ILMN_219214	Gstm5	2.3e-10	-2.02823	NM_010360.2
ILMN_222476	Arhgap24	2.31e-10	-1.8054	NM_029270.1
ILMN_213477	Ccrl1	2.33e-10	2.24588	NM_145700.1
ILMN_248835	Ctsa	2.34e-10	-2.95597	NM_001038492.1
ILMN_226094	Mthfd1	2.35e-10	1.89854	NM_138745.1
ILMN_332368	LOC100042405	2.37e-10	-2.72867	XM_001478555.1
ILMN_251885	Baiap2l1	2.38e-10	-2.31534	NM_025833.3
ILMN_210301	Itgb6	2.39e-10	-3.02901	NM_021359.2
ILMN_230951	Lsm1	2.4e-10	2.04224	NM_026032.1
ILMN_220295	Mrpl4	2.4e-10	3.67741	NM_023167.2
ILMN_256266	Ndufb10	2.41e-10	2.93627	NM_026684.1
ILMN_217690	Psme4	2.43e-10	-1.57706	NM_134013.3
ILMN_327411	Rasa3	2.44e-10	-1.84136	NM_009025.2
ILMN_211535	Med30	2.45e-10	-2.10947	NM_027212.2
ILMN_202587	A430024H01Rik	2.46e-10	1.64297	AK020747
ILMN_223340	Acaa1a	2.46e-10	2.47879	NM_130864.3
ILMN_213875	1110002H13Rik	2.47e-10	-3.89304	NM_025376.1
ILMN_242141	Cyp2u1	2.47e-10	1.55448	NM_027816.1
ILMN_211772	Atf3	2.48e-10	2.36906	NM_007498.2
ILMN_195966	Smc5l1	2.49e-10	-1.57963	NM_153808
ILMN_256716	Cdk2	2.51e-10	-2.29307	NM_183417.2
ILMN_254904	Erbb2	2.53e-10	-2.44887	NM_001003817.1
ILMN_197796	Fbxo10	2.53e-10	-1.68871	XM_194139.6
ILMN_221407	Myadm	2.56e-10	-2.18684	NM_016969.1
ILMN_218614	Eif1a	2.57e-10	-1.71748	NM_010120.4
ILMN_256682	Dnm1l	2.6e-10	1.91258	NM_001025947.1
ILMN_245175	Best1	2.62e-10	-2.633	NM_011913.1
ILMN_211715	Dnajc27	2.63e-10	2.25896	NM_153082.3
ILMN_221227	Unc45b	2.64e-10	-2.46215	NM_178680.3
ILMN_250060	Pdia6	2.67e-10	-1.9315	NM_027959.3
ILMN_191891	Tnni3	2.71e-10	2.00992	NM_009406.3
ILMN_193870	Sulf1	2.76e-10	-2.13215	NM_172294
ILMN_240483	Uap1l1	2.77e-10	-2.24905	NM_001033293.2
ILMN_209531	Ndufs2	2.77e-10	2.24957	NM_153064.4
ILMN_196931	LOC277856	2.78e-10	2.11072	XM_204210.2
ILMN_202711	0610007J10Rik	2.81e-10	2.49969	AK018717
ILMN_191923	Zap70	2.83e-10	-1.69736	NM_009539.2
ILMN_220803	Dhx35	2.83e-10	2.23553	NM_145742.1
ILMN_214128	Erlin1	2.83e-10	-1.67588	NM_145502.2
ILMN_223570	Timm8a1	2.84e-10	3.17801	NM_013898.1
ILMN_236152	Pla1a	2.85e-10	-1.69997	NM_134102.2
ILMN_228904	Mrps22	2.87e-10	2.20993	NM_025485.1
ILMN_186385	Zmpste24	2.91e-10	-1.52207	NM_172700.2
ILMN_314074	LOC100046056	2.92e-10	-2.83104	XM_001475483.1
ILMN_219217	Blcap	2.92e-10	2.08622	NM_016916.3
ILMN_209418	Anln	2.92e-10	-2.34841	NM_028390.2
ILMN_220216	Echs1	2.92e-10	2.6646	NM_053119.1
ILMN_211704	Papd1	2.99e-10	2.01189	NM_026157.2
ILMN_241119	Gpr113	3e-10	-1.86738	NM_001014394.2
ILMN_233027	Mknk1	3.03e-10	1.82657	NM_021461.4
ILMN_222871	Dnajc15	3.03e-10	2.53901	NM_025384.3
ILMN_237935	Rhob	3.05e-10	-2.4058	NM_007483.2
ILMN_252535	Snx4	3.07e-10	-2.19217	NM_080557.2
ILMN_223544	Rbck1	3.08e-10	2.40829	NM_019705.3
ILMN_220503	Plat	3.09e-10	-2.04199	NM_008872
ILMN_213240	Pdhb	3.11e-10	2.81064	NM_024221.3
ILMN_209931	Wipi1	3.13e-10	-2.54336	NM_145940.2
ILMN_218369	Zfp385c	3.16e-10	1.649	NM_177790.3
ILMN_219539	Fkbpl	3.18e-10	2.35816	NM_019873.2
ILMN_218878	Itga7	3.19e-10	-3.22612	NM_008398.2
ILMN_257615	Vars2	3.19e-10	1.94061	NM_175137.3
ILMN_216574	Lrp11	3.19e-10	-2.40897	NM_172784.2
ILMN_215839	Ephx1	3.2e-10	1.51037	NM_010145.2
ILMN_195299	Egr3	3.2e-10	-3.00341	NM_018781
ILMN_184842	Mrps10	3.2e-10	1.83719	NM_183086
ILMN_212220	1700020C11Rik	3.22e-10	2.90757	NM_026443.4
ILMN_220669	Plk2	3.28e-10	-2.46853	NM_152804.1
ILMN_259411	Soat1	3.29e-10	-1.67803	NM_009230.3
ILMN_257213	Sys1	3.31e-10	1.90558	NM_025575.3
ILMN_226975	2310003C23Rik	3.33e-10	1.86661	NM_029607.1
ILMN_217682	Gas6	3.33e-10	2.45834	NM_019521.2
ILMN_215041	Nans	3.33e-10	-2.50332	NM_053179.3
ILMN_216279	Pole4	3.33e-10	3.10013	NM_025882.3
ILMN_213202	Ift81	3.34e-10	-1.73963	NM_009879.2
ILMN_247039	Rell1	3.39e-10	-2.17449	NM_145923.4
ILMN_212207	Pip4k2b	3.4e-10	-2.66803	NM_054051.1
ILMN_224563	Mapk1ip1	3.45e-10	1.6184	NM_001045483.1
ILMN_219837	Taf10	3.46e-10	-1.62207	NM_020024.3
ILMN_190311	Tnnt3	3.49e-10	-1.90051	NM_011620.2
ILMN_214199	Armcx1	3.52e-10	-2.77457	NM_030066.2
ILMN_257108	Egfl7	3.55e-10	1.88551	NM_198725.1
ILMN_214618	Etfa	3.6e-10	2.19525	NM_145615.3
ILMN_214148	C130085G02Rik	3.61e-10	-2.0313	XM_136364.4
ILMN_247161	6430706D22Rik	3.66e-10	-2.45254	NM_198652.1
ILMN_212388	Gpx8	3.67e-10	-1.94048	NM_027127.2
ILMN_198272	LOC381140	3.7e-10	-2.50466	XM_355056.1
ILMN_233335	Dynll1	3.71e-10	-1.72788	NM_019682.2
ILMN_221725	Mecr	3.77e-10	1.94322	NM_025297.1
ILMN_244221	Rbbp4	3.79e-10	-2.92382	NM_009030.3
ILMN_210171	Smpdl3b	3.82e-10	2.5907	NM_133888.2
ILMN_223430	Scin	3.83e-10	1.85792	NM_009132.1
ILMN_216644	Acss2	3.85e-10	2.49981	NM_019811.3
ILMN_195527	Ssr1	3.86e-10	-1.86538	NM_025965
ILMN_224261	Npepl1	3.88e-10	1.84248	NM_213733
ILMN_246128	Tmbim1	3.88e-10	-2.50192	NM_027154.3
ILMN_185218	Txndc5	3.92e-10	-2.04935	NM_145367.3
ILMN_215988	Ndufa4	3.93e-10	2.23695	NM_010886.1
ILMN_210506	Gch1	3.94e-10	2.15556	NM_008102.3
ILMN_214977	Kctd5	4.01e-10	-1.81832	NM_027008.1
ILMN_212931	Arfrp1	4.01e-10	2.01824	NM_029702.3
ILMN_185749	Vgll2	4.04e-10	-1.66444	NM_153786.1
ILMN_223586	Mfsd7	4.05e-10	-1.79993	NM_172883.1
ILMN_220613	0610009O20Rik	4.06e-10	2.29368	NM_024179.4
ILMN_218572	Serpinb1a	4.09e-10	-2.83848	NM_025429.2
ILMN_256951	8030451F13Rik	4.16e-10	-2.11107	NM_175418.3
ILMN_219096	Scarb2	4.19e-10	-1.94973	NM_007644.2
ILMN_326458	LOC675228	4.23e-10	2.20244	XR_034614.1
ILMN_218920	Akr1b8	4.27e-10	3.7432	NM_008012.1
ILMN_217355	Lrrc26	4.27e-10	-1.51781	NM_146117.1
ILMN_209733	Mff	4.3e-10	2.45578	NM_029409.2
ILMN_237017	Myo10	4.31e-10	-2.1269	NM_019472.1
ILMN_216010	Tmem82	4.34e-10	1.89323	NM_145987.2
ILMN_224162	Myom2	4.41e-10	-2.99783	NM_008664
ILMN_185962	Yif1a	4.45e-10	2.1626	NM_026553.3
ILMN_206876	D930042A21Rik	4.45e-10	-1.89398	AK086621
ILMN_192776	Usp36	4.47e-10	1.63192	XM_126772.6
ILMN_239705	Slc25a42	4.47e-10	2.22606	NM_001007570.1
ILMN_331995	LOC100046483	4.52e-10	-1.543	XM_001476285.1
ILMN_327369	LOC100044298	4.53e-10	-1.85786	XM_001471758.1
ILMN_188811	scl000408.1_6	4.55e-10	2.87176	AK009508.1
ILMN_253735	Saal1	4.62e-10	-1.6721	XM_620495.3
ILMN_328343	Asprv1	4.63e-10	-2.12577	NM_026414.2
ILMN_261553	Plxna2	4.64e-10	-1.70599	NM_008882.2
ILMN_237435	Col23a1	4.65e-10	-1.91577	NM_153393.1
ILMN_223745	Cdk5r1	4.65e-10	-2.52345	NM_009871.2
ILMN_251937	LOC638892	4.66e-10	3.05835	XM_915073.1
ILMN_210923	Smarce1	4.66e-10	-1.81734	NM_020618.3
ILMN_210008	Ptcd2	4.73e-10	2.39749	XM_127497.2
ILMN_223465	Kin	4.74e-10	1.88718	NM_025280.2
ILMN_247195	Bglap1	4.75e-10	-1.96545	NM_001037939.1
ILMN_315418	LOC100044692	4.75e-10	-1.63586	XM_001472863.1
ILMN_222243	2410012H22Rik	4.76e-10	1.59193	XM_126343.5
ILMN_213386	Hspe1	4.79e-10	3.72441	NM_008303.2
ILMN_223070	Lsm3	4.81e-10	2.81126	NM_026309.1
ILMN_246684	732482	4.83e-10	2.07143	NR_003107.1
ILMN_241596	Rexo1	4.83e-10	1.69513	NM_025852.3
ILMN_209624	Rabl3	4.98e-10	1.63348	NM_026297.1
ILMN_211717	Gadd45gip1	4.98e-10	2.07963	NM_183358.3
ILMN_210402	Ubqln4	5.04e-10	1.9326	NM_033526.2
ILMN_236479	Camta1	5.08e-10	1.90161	NM_001081557.1
ILMN_221842	Ankrd23	5.09e-10	-2.46715	NM_153502.3
ILMN_211739	Mical3	5.09e-10	-1.52919	NM_153396.1
ILMN_211950	Ethe1	5.11e-10	2.2915	NM_023154.3
ILMN_219063	Ccdc53	5.14e-10	-2.09602	NM_026070.2
ILMN_215270	Mtap1s	5.23e-10	-2.4056	NM_173013.2
ILMN_220872	Sertad4	5.23e-10	-2.05898	NM_198247.1
ILMN_223574	Cenpa	5.23e-10	-2.47766	NM_007681.2
ILMN_188613	Tusc4	5.24e-10	2.07786	NM_018879.1
ILMN_189909	Adsl	5.29e-10	2.50424	NM_009634
ILMN_247433	Ivd	5.31e-10	1.84992	NM_019826.3
ILMN_212571	Prkg2	5.36e-10	-1.71346	NM_008926.3
ILMN_210831	Actg2	5.41e-10	-2.01013	NM_009610.1
ILMN_210641	Xrcc6	5.43e-10	1.51512	NM_010247.2
ILMN_216692	Pkia	5.48e-10	-2.3867	NM_008862.3
ILMN_213038	Lima1	5.51e-10	-2.66662	NM_023063.1
ILMN_216684	Smyd2	5.52e-10	1.65654	NM_026796.1
ILMN_201851	5730543M03Rik	5.59e-10	1.7242	AK017820
ILMN_240514	B3gntl1	5.61e-10	-2.14022	NM_178664.3
ILMN_239496	Myh1	5.63e-10	-3.54557	NM_030679.1
ILMN_207209	C130073O12Rik	5.65e-10	-3.97556	AK081751
ILMN_240407	Azi2	5.66e-10	1.62785	NM_001048146.1
ILMN_219227	Fbxo18	5.67e-10	1.986	NM_015792.1
ILMN_223284	Pard6g	5.68e-10	-1.65373	NM_053117.2
ILMN_258683	Atg2a	5.69e-10	1.90064	NM_194348.3
ILMN_220626	Otog	5.75e-10	-2.90293	NM_013624.1
ILMN_209211	Slc4a3	5.76e-10	-2.09423	NM_009208.1
ILMN_237786	Dusp27	5.76e-10	-2.14399	NM_001033344.2
ILMN_217696	Spsb1	5.86e-10	-1.94735	NM_029035.2
ILMN_220624	Anxa8	5.87e-10	-2.49654	NM_013473.2
ILMN_211239	Hspb2	5.99e-10	-2.42976	NM_024441.1
ILMN_221298	Abhd10	6.02e-10	1.75672	NM_172511.2
ILMN_227382	Med1	6.06e-10	1.84207	NM_001080118.1
ILMN_186566	Glg1	6.08e-10	-2.05333	NM_009149
ILMN_226040	Mylk	6.08e-10	-2.3743	NM_139300.3
ILMN_211307	Fah	6.09e-10	-1.92168	NM_010176.2
ILMN_221823	Iscu	6.12e-10	1.64985	NM_025526.3
ILMN_227089	Ptprk	6.16e-10	-2.0738	NM_008983.1
ILMN_254160	Camk2n1	6.16e-10	1.82624	NM_025451.1
ILMN_216041	Abcb6	6.18e-10	2.887	NM_023732.2
ILMN_234975	Akap1	6.18e-10	1.80476	NM_001042541.1
ILMN_218332	Ltbp1	6.21e-10	-2.42415	NM_206958.1
ILMN_208838	2700038C09Rik	6.22e-10	1.51029	NM_025598.1
ILMN_251017	Rnaseh2a	6.22e-10	1.6346	NM_027187.3
ILMN_211164	D030070L09Rik	6.26e-10	-1.61745	NM_172625.1
ILMN_186037	4833420G11Rik	6.26e-10	1.72132
ILMN_211631	Slc12a2	6.31e-10	-2.25516	NM_009194.2
ILMN_211844	Als2	6.37e-10	-1.74239	NM_028717.3
ILMN_198993	LOC380630	6.38e-10	1.80648	XM_354534.1
ILMN_188284	Ube2b	6.43e-10	1.69298	NM_009458.2
ILMN_220691	Cd9	6.48e-10	-1.9643	NM_007657.2
ILMN_188615	Tnfrsf22	6.54e-10	-1.65802	NM_023680
ILMN_220820	2310003F16Rik	6.54e-10	-1.71997	NM_026318.2
ILMN_332517	Gpr137b-ps	6.62e-10	-1.79164	NR_003568.1
ILMN_196583	Gats	6.62e-10	-2.05218	NM_030719.3
ILMN_230504	1700040I03Rik	6.63e-10	3.0237	NM_028505.1
ILMN_229399	2010003J03Rik	6.71e-10	2.46365	NM_027236.1
ILMN_228304	Peo1	6.75e-10	2.50852	NM_153796.3
ILMN_218399	Mrps35	6.81e-10	2.80765	NM_145573.2
ILMN_209336	Pacsin1	6.91e-10	1.82034	NM_011861.2
ILMN_215400	Mapkap1	6.93e-10	1.83585	NM_177345.2
ILMN_215527	Clk3	6.96e-10	1.68637	NM_007713.3
ILMN_239185	Rprd1a	6.97e-10	1.58305	NM_144861.2
ILMN_216949	Cmya5	7e-10	-1.70889	NM_023821.2
ILMN_216501	Cldn2	7e-10	-2.17589	NM_016675.3
ILMN_197084	LOC227393	7.01e-10	1.89941	XM_129965.3
ILMN_224735	Cep152	7.06e-10	1.89193	NM_001081091.1
ILMN_219129	Dph3	7.09e-10	1.9141	NM_172254.3
ILMN_209617	App	7.1e-10	-1.77834	NM_007471.1
ILMN_221476	Map3k11	7.21e-10	2.64308	NM_022012.3
ILMN_322147	LOC100048845	7.33e-10	-1.57238	XM_001479169.1
ILMN_214878	Deb1	7.36e-10	2.33421	NM_026794.2
ILMN_196592	Gsta1	7.42e-10	-1.8048	NM_008181.3
ILMN_213726	Nmral1	7.46e-10	-1.73889	NM_026393.1
ILMN_220949	4933426M11Rik	7.47e-10	-2.43103	NM_178682.3
ILMN_191549	scl0002007.1_97	7.49e-10	2.27821
ILMN_231264	Anxa4	7.5e-10	-1.81103	NM_013471.1
ILMN_185441	Uxt	7.57e-10	2.02289	NM_013840.2
ILMN_214061	Ppm1g	7.59e-10	2.56881	NM_008014.3
ILMN_213844	Lgals2	7.71e-10	1.71681	NM_025622.2
ILMN_216726	Renbp	7.78e-10	-1.8668	NM_023132.2
ILMN_210225	Igfbp4	7.78e-10	-2.52536	NM_010517.3
ILMN_219470	Tas1r1	7.79e-10	-2.6833	NM_031867.1
ILMN_210022	2410015M20Rik	7.94e-10	2.40878	NM_153152.3
ILMN_215067	Suv420h2	7.96e-10	2.46665	NM_146177.1
ILMN_212507	Pvr	7.96e-10	-1.64758	NM_027514.1
ILMN_187116	Zfp598	8.02e-10	1.70004	NM_183149.1
ILMN_245981	Rit1	8.03e-10	-1.58233	NM_009069.3
ILMN_260694	Slco3a1	8.1e-10	-1.87761	NM_023908.2
ILMN_209663	Mboat1	8.11e-10	-1.77952	NM_153546.3
ILMN_244321	Ints10	8.13e-10	1.80405	NM_027590.3
ILMN_215752	Stbd1	8.14e-10	-1.90739	NM_175096.3
ILMN_232528	Lamc1	8.21e-10	-2.23998	NM_010683.2
ILMN_205973	Ddx26	8.22e-10	-2.00155	AK051573
ILMN_207453	2610208M17Rik	8.26e-10	-1.62468	NM_145626.1
ILMN_211112	Pcolce2	8.33e-10	-1.68493	NM_029620.2
ILMN_209247	Eif4e2	8.36e-10	-1.80013	NM_023314.3
ILMN_216454	Fam116b	8.36e-10	2.16732	NM_027081.3
ILMN_214543	Ankmy1	8.41e-10	-1.75556	NM_172850.2
ILMN_208984	Ndufc1	8.41e-10	1.79429	NM_025523.1
ILMN_213475	Ecm1	8.45e-10	-2.68977	NM_007899.1
ILMN_210488	Pcgf1	8.47e-10	1.76534	NM_197992.1
ILMN_210026	A130092J06Rik	8.48e-10	1.86927	NM_175511.4
ILMN_189445	AU020206	8.48e-10	-1.65761
ILMN_211323	Gpnmb	8.55e-10	2.03815	NM_053110.3
ILMN_210134	Mgst3	8.61e-10	1.8892	NM_025569.1
ILMN_250879	Bat4	8.62e-10	2.03231	NM_032460.1
ILMN_208893	Wnk1	8.7e-10	-1.99322	NM_198703.1
ILMN_222592	Cacna2d1	8.72e-10	-3.28196	NM_009784.1
ILMN_243465	D14Ertd449e	8.74e-10	-1.69269	NM_025311.1
ILMN_239826	Serpinb6a	8.89e-10	-1.91505	NM_009254.2
ILMN_217781	Sema4a	8.9e-10	1.7048	NM_013658.2
ILMN_214744	Nes	8.94e-10	-3.59332	NM_016701.3
ILMN_253408	AI847670	9.07e-10	1.89532	NM_177869.3
ILMN_213429	Bad	9.14e-10	2.00479	NM_007522.2
ILMN_214315	2310035K24Rik	9.14e-10	1.70836	NM_027129.2
ILMN_211490	Sgta	9.15e-10	2.78316	NM_024499.1
ILMN_314671	9830123M21Rik	9.24e-10	-2.20781	XM_001478294.1
ILMN_188936	Tnnc2	9.27e-10	-1.87881	NM_009394.2
ILMN_224105	Edg2	9.34e-10	-1.99379	NM_010336
ILMN_218832	Gpr162	9.36e-10	1.51344	NM_013533.3
ILMN_224124	Kif23	9.36e-10	-1.78235	NM_024245
ILMN_212305	Pea15	9.37e-10	-2.33874	NM_008556.1
ILMN_192302	Ubxn6	9.41e-10	1.83578	NM_024432.2
ILMN_210237	Aurkaip1	9.42e-10	1.99753	NM_025338.3
ILMN_224087	Hist1h1c	9.47e-10	-1.75177	NM_015786
ILMN_184645	C230098O21Rik	9.49e-10	-1.71819
ILMN_214542	S100a1	9.61e-10	2.29886	NM_011309.3
ILMN_213316	Psmd11	9.62e-10	-1.86089	NM_178616.2
ILMN_217724	Hmox2	9.65e-10	2.09277	NM_010443.1
ILMN_310024	OTTMUSG00000001070	9.72e-10	-2.61175	NM_001099331.1
ILMN_189279	Adamtsl4	9.77e-10	-1.66703	NM_144899.2
ILMN_322016	LOC100045522	9.78e-10	-1.60637	XM_001474445.1
ILMN_320828	LOC100047963	9.92e-10	-2.3546	XM_001479238.1
ILMN_215279	Narf	1e-09	1.62407	NM_026272.2
ILMN_211004	Fxr1h	1e-09	-2.50085	AF124385
ILMN_216414	Hsd17b7	1.01e-09	-1.78699	NM_010476.3
ILMN_218624	Rabac1	1.01e-09	1.8785	NM_010261.2
ILMN_212907	Serf1	1.01e-09	-2.03808	NM_011353.1
ILMN_197760	LOC268828	1.01e-09	1.6813	XM_196132.1
ILMN_218420	Fndc3b	1.02e-09	-2.05474	NM_173182.1
ILMN_215291	Ndufa9	1.02e-09	2.24326	NM_025358.2
ILMN_226572	2310033K02Rik	1.03e-09	1.98954	NM_001080708.1
ILMN_221808	Jmjd6	1.03e-09	1.88091	NM_033398.2
ILMN_247046	Afg3l2	1.04e-09	2.79794	NM_027130.1
ILMN_210235	Obrgrp	1.06e-09	-2.08236	NM_175036
ILMN_221743	Prelp	1.07e-09	-1.69994	NM_054077.3
ILMN_219114	Chchd1	1.07e-09	1.6789	NM_025366.2
ILMN_210674	Hes6	1.07e-09	-2.27637	NM_019479.2
ILMN_185673	Wbp5	1.07e-09	-1.75903	NM_011712.1
ILMN_316229	LOC100047167	1.08e-09	-2.15378	XM_001477568.1
ILMN_247380	Zfp27	1.08e-09	1.88766	NM_001037707.1
ILMN_209750	Ranbp1	1.08e-09	2.03033	NM_011239.2
ILMN_209318	B2m	1.08e-09	-1.5464	NM_009735.2
ILMN_214743	Nfyc	1.08e-09	2.10361	NM_008692.3
ILMN_190997	Wasf2	1.09e-09	-1.94129	NM_153423
ILMN_239993	Specc1	1.09e-09	-1.95081	NM_001029936.2
ILMN_240291	Ppap2c	1.09e-09	1.72995	NM_015817.2
ILMN_210143	Pigh	1.1e-09	-2.22227	NM_029988.2
ILMN_211936	Inppl1	1.11e-09	-2.07582	NM_010567.1
ILMN_245559	Loxl1	1.11e-09	-1.81699	NM_010729.2
ILMN_247346	D19Wsu162e	1.12e-09	-1.86355	NM_146099.2
ILMN_253468	C8g	1.12e-09	1.68727	NM_027062.1
ILMN_250919	Ryr3	1.13e-09	-1.71804	NM_177652.2
ILMN_194582	Lpin1	1.13e-09	1.51025	NM_015763
ILMN_189372	Bves	1.13e-09	-2.27083	NM_024285
ILMN_312145	LOC100047937	1.14e-09	1.5572	XM_001479188.1
ILMN_212250	Pik3r3	1.14e-09	-1.6209	NM_181585.5
ILMN_234448	Glipr2	1.14e-09	-1.59882	NM_027450.3
ILMN_210033	A230051G13Rik	1.14e-09	1.8826	NM_173785.2
ILMN_214645	Sod2	1.15e-09	2.30596	NM_013671.2
ILMN_222528	3110040N11Rik	1.15e-09	-1.78365	NM_026077.3
ILMN_239687	Ccno	1.15e-09	1.51941	NM_001081062.1
ILMN_311466	LOC667609	1.15e-09	3.84272	XR_032582.1
ILMN_192391	Acta2	1.15e-09	-2.41301	NM_007392
ILMN_185329	Zdhhc6	1.17e-09	-1.67703	NM_025883.3
ILMN_214897	Tead2	1.18e-09	-2.38501	NM_011565.2
ILMN_209217	Lrtm1	1.18e-09	-1.7246	NM_176920.3
ILMN_231400	Rrp1b	1.19e-09	-1.70004	NM_028244.1
ILMN_222789	Ndufa6	1.19e-09	2.08848	NM_025987.1
ILMN_249185	Rbbp9	1.2e-09	-1.7991	NM_015754.2
ILMN_222749	Rpp25	1.2e-09	1.71683	NM_133982.1
ILMN_202422	Prep	1.2e-09	1.5109	AK007865
ILMN_211382	Myoz1	1.21e-09	-1.77031	NM_021508.3
ILMN_214808	Mast2	1.21e-09	-2.29101	NM_008641.2
ILMN_215241	Surf1	1.23e-09	2.1925	NM_013677.1
ILMN_211336	Slc25a38	1.23e-09	1.84138	NM_144793.1
ILMN_252979	Mapkapk3	1.24e-09	1.93729	NM_178907.1
ILMN_223099	Fgfbp1	1.24e-09	-2.06055	NM_008009.2
ILMN_201718	2400010C15Rik	1.24e-09	2.12103	AK010307
ILMN_189905	Wdr45	1.25e-09	1.8153	NM_172372.1
ILMN_223694	Ndufaf1	1.25e-09	2.15948	NM_027175.3
ILMN_243883	Atp5h	1.26e-09	2.08255	NM_027862.1
ILMN_255437	Tuba1a	1.26e-09	-1.70387	NM_011653.1
ILMN_212836	Prkar1a	1.26e-09	-1.63947	NM_021880.2
ILMN_213897	Cplx1	1.26e-09	2.39069	NM_007756.2
ILMN_186712	Unc84a	1.27e-09	-1.70035	NM_024451.1
ILMN_208836	Tceb1	1.27e-09	2.40541	NM_026456.2
ILMN_223221	Crabp2	1.28e-09	-1.82343	NM_007759.2
ILMN_215484	Apba3	1.28e-09	2.17955	NM_018758.1
ILMN_190754	D030028O16Rik	1.29e-09	-1.90402	NM_145984
ILMN_210757	Skiv2l2	1.31e-09	3.32342	NM_028151.2
ILMN_211907	Igf2bp2	1.32e-09	-2.07941	NM_183029.1
ILMN_216408	1110008F13Rik	1.33e-09	1.81309	NM_026124.2
ILMN_188024	1110002E22Rik	1.33e-09	-2.80495
ILMN_228685	LOC676640	1.33e-09	-1.70771	XM_001003712.1
ILMN_226251	1810035L17Rik	1.35e-09	2.07321	NM_026958.2
ILMN_186718	Dm15	1.35e-09	-2.14893	NM_032418
ILMN_202649	E430039I23Rik	1.35e-09	2.14026	AK089103
ILMN_218408	Tmem55a	1.36e-09	-2.06456	NM_028264.2
ILMN_198350	Hak-pending	1.36e-09	-1.82338	XM_128981.2
ILMN_224541	Sytl2	1.37e-09	-2.627	NM_001040088.1
ILMN_241891	D16Ertd472e	1.37e-09	-2.01843	NM_025967.2
ILMN_259121	Parp4	1.37e-09	1.63291	XM_994286.2
ILMN_323971	1110029I05Rik	1.37e-09	1.57424	XM_001474212.1
ILMN_247977	Inadl	1.37e-09	-1.62519	NM_172696.2
ILMN_217187	Ccndbp1	1.39e-09	-2.036	NM_010761.2
ILMN_217704	Ard1	1.43e-09	2.17385	NM_019870.1
ILMN_220373	Msto1	1.43e-09	2.25776	NM_144898.1
ILMN_214139	Fastk	1.45e-09	2.39593	NM_023229.2
ILMN_216700	Itgb1bp1	1.45e-09	1.53401	NM_008403.4
ILMN_219274	Dedd2	1.46e-09	2.03037	NM_207677.3
ILMN_221867	Ubiad1	1.47e-09	1.74019	NM_027873.2
ILMN_212000	Csn3	1.48e-09	1.89217	NM_007786.2
ILMN_220185	Fosl2	1.51e-09	-1.81437	NM_008037.3
ILMN_234029	Nuak1	1.52e-09	-1.98199	NM_001004363.1
ILMN_218890	Ncaph2	1.53e-09	-1.53526	NM_025795.2
ILMN_217208	Isca1	1.53e-09	1.92951	NM_026921.2
ILMN_191277	2310040B03Rik	1.55e-09	1.56238
ILMN_260026	Dab2	1.56e-09	-1.86405	NM_001008702.1
ILMN_213351	Syne1	1.57e-09	-1.82757	NM_022027
ILMN_211415	Ebpl	1.57e-09	-1.83437	NM_026598.2
ILMN_243533	Mrps15	1.57e-09	3.0359	NM_025544.2
ILMN_235674	Pdlim5	1.6e-09	-2.81071	NM_019809.1
ILMN_243054	Qars	1.62e-09	1.71952	NM_133794.1
ILMN_214410	Lrrfip1	1.62e-09	-1.82752	NM_008515.1
ILMN_221928	Mrpl30	1.63e-09	2.16475	NM_027098.2
ILMN_313747	LOC100046741	1.63e-09	-1.94349	XM_001476728.1
ILMN_216275	Ubtd2	1.63e-09	-2.05332	NM_173784.3
ILMN_220776	Ubxn8	1.64e-09	1.74271	NM_178648.2
ILMN_250186	Slc41a3	1.65e-09	1.81985	NM_001037493.1
ILMN_214324	2410022L05Rik	1.65e-09	1.77117	NM_025556.2
ILMN_221336	Slc6a17	1.66e-09	2.11411	NM_172271.2
ILMN_214117	Adamts4	1.66e-09	-2.3243	NM_172845.1
ILMN_208746	Sra1	1.66e-09	-1.92814	NM_025291.1
ILMN_219962	Hmga1	1.68e-09	3.58549	NM_016660.2
ILMN_222263	Pank1	1.68e-09	2.49932	NM_023792.1
ILMN_215585	Pmp22	1.69e-09	-1.85595	NM_008885.2
ILMN_242848	Mid1	1.7e-09	-2.72945	NM_183151.1
ILMN_240209	Spnb3	1.71e-09	1.62026	NM_021287.1
ILMN_319637	Vgll3	1.71e-09	-1.86616	XM_001480406.1
ILMN_211234	Clpx	1.71e-09	1.78823	NM_011802.2
ILMN_211941	Echdc3	1.71e-09	1.86402	NM_024208.4
ILMN_214620	Dbndd1	1.71e-09	-1.66527	NM_028146.2
ILMN_214901	H2-Ke6	1.71e-09	1.65495	NM_013543.1
ILMN_209927	Eif2b1	1.71e-09	1.93441	NM_145371.1
ILMN_191967	2210408F11Rik	1.72e-09	-1.63111
ILMN_209408	Lig1	1.74e-09	-1.78686	NM_010715.2
ILMN_210799	Itgb1	1.74e-09	-1.75695	NM_010578.1
ILMN_215604	Mnat1	1.75e-09	-1.68088	NM_008612.2
ILMN_185734	Frmd4a	1.76e-09	-2.40679	NM_172475
ILMN_213371	1110020P15Rik	1.76e-09	1.6573	NM_197979.2
ILMN_189984	Wfdc1	1.76e-09	-1.8387	NM_023395.1
ILMN_223469	Tceal8	1.76e-09	-2.06365	NM_025703.2
ILMN_222159	Olfml2b	1.78e-09	-2.07156	NM_177068.3
ILMN_222661	Zfand3	1.78e-09	-1.69766	NM_148926.2
ILMN_216489	Cbfb	1.79e-09	-2.22342	NM_022309.3
ILMN_196940	LOC381283	1.81e-09	1.94688	XM_358544.1
ILMN_317186	LOC100046746	1.82e-09	1.82235	XM_001476743.1
ILMN_216270	Dclk2	1.82e-09	1.96335	NM_027539.3
ILMN_234460	Usp47	1.82e-09	-1.85952	NM_133758.2
ILMN_216123	Josd2	1.83e-09	2.42013	NM_025368.3
ILMN_193217	D9Ertd392e	1.87e-09	1.6758	NM_028181
ILMN_213961	Lrp4	1.87e-09	-2.41891	NM_172668.2
ILMN_324430	LOC100046895	1.89e-09	-1.88328	XM_001477026.1
ILMN_248452	Ankrd50	1.89e-09	-1.92251	NM_001033198.2
ILMN_189042	Sin3b	1.9e-09	-1.83142	NM_009188
ILMN_217517	Adrb2	1.9e-09	-1.77981	NM_007420.2
ILMN_187890	scl000292.1_12	1.9e-09	2.37971	XM_127742.4
ILMN_211500	Nagk	1.9e-09	1.95324	NM_019542.1
ILMN_212654	Fam108a	1.9e-09	1.72901	NM_145421.1
ILMN_214590	Gstp1	1.94e-09	1.51267	NM_013541.1
ILMN_221326	Prrx2	1.95e-09	-1.54473	XM_149096.1
ILMN_217389	2310036O22Rik	1.95e-09	2.23328	NM_026760.2
ILMN_229231	Myh4	1.95e-09	-4.62649	NM_010855.2
ILMN_258733	EG623818	1.96e-09	1.75425	XM_888318.3
ILMN_215492	Timm50	1.99e-09	2.04202	NM_025616.3
ILMN_240428	Ppargc1b	1.99e-09	-2.42594	NM_133249.2
ILMN_226244	Fars2	2e-09	1.75441	NM_001039189.1
ILMN_192673	Spred1	2.01e-09	-1.91001	NM_033524
ILMN_242858	Hdc	2.04e-09	-1.76348	NM_008230.4
ILMN_223665	Capn1	2.04e-09	-2.16707	NM_007600.2
ILMN_259398	Alkbh4	2.05e-09	1.62348	NM_028070.1
ILMN_222359	Cox11	2.06e-09	2.22916	NM_199008.2
ILMN_311768	LOC100045882	2.07e-09	-2.91164	XM_001475083.1
ILMN_212019	Myog	2.08e-09	-2.57636	NM_031189.1
ILMN_221926	Gadd45a	2.09e-09	-2.31383	NM_007836.1
ILMN_218416	Fen1	2.1e-09	-1.6122	NM_007999.3
ILMN_219665	Mrpl1	2.11e-09	2.27346	NM_053158.1
ILMN_210833	Mrps25	2.14e-09	1.74398	NM_025578.2
ILMN_218994	Sv2a	2.15e-09	1.58901	NM_022030.3
ILMN_242741	Pxmp2	2.15e-09	1.63209	NM_008993.2
ILMN_215094	Rnf126	2.16e-09	1.89627	NM_144528.1
ILMN_213609	1200002N14Rik	2.16e-09	-1.74773	NM_027878.2
ILMN_249374	AK129341	2.16e-09	1.73552	NM_001045524.1
ILMN_212193	Prcc	2.18e-09	1.7566	NM_033573.1
ILMN_196729	Hist1h2ah	2.23e-09	-2.38693	NM_175659.1
ILMN_193807	Dolk	2.24e-09	1.59948	NM_177648.3
ILMN_311151	Stx11	2.25e-09	-1.96496	XM_001472888.1
ILMN_318532	LOC100044934	2.25e-09	-2.11333	XR_031569.1
ILMN_214045	Has2	2.26e-09	-1.88292	NM_008216.2
ILMN_211516	Rce1	2.26e-09	2.08754	NM_023131.1
ILMN_209265	Sdhc	2.28e-09	1.79415	NM_025321.2
ILMN_218008	Nudt22	2.3e-09	1.98131	NM_026675.2
ILMN_217810	1300018J18Rik	2.3e-09	1.81547	NM_027905.2
ILMN_217199	Lrrc59	2.31e-09	-1.73171	NM_133807.1
ILMN_259728	Pddc1	2.33e-09	1.65211	NM_172116.2
ILMN_223835	Pgbpll	2.34e-09	1.71422	NM_145147
ILMN_242787	Il12a	2.35e-09	-1.9109	NM_008351.1
ILMN_214342	Copz2	2.4e-09	-1.70047	NM_019877.2
ILMN_223394	Tbcel	2.4e-09	2.47715	NM_173038.3
ILMN_185985	D10Ertd516e	2.41e-09	1.54451	XM_125901
ILMN_231150	Asph	2.42e-09	-2.19456	NM_133723.2
ILMN_192108	Mela	2.43e-09	-2.06172	NM_008581
ILMN_248458	Fam162a	2.44e-09	1.96485	NM_027342.1
ILMN_194153	Preb	2.45e-09	-1.79607	NM_016703
ILMN_214397	Ccdc84	2.49e-09	2.32808	NM_201372.3
ILMN_317989	LOC100045737	2.51e-09	1.86418	XR_031944.1
ILMN_214907	Nsun4	2.51e-09	2.01929	NM_028142.3
ILMN_220203	Hace1	2.52e-09	-1.6616	NM_172473.2
ILMN_218915	S100a13	2.53e-09	1.90281	NM_009113.3
ILMN_215483	Slc25a5	2.54e-09	1.69996	NM_007451.3
ILMN_212913	Dnajb11	2.55e-09	-1.67021	XM_148071.1
ILMN_220571	Mmp14	2.56e-09	-2.03364	NM_008608.2
ILMN_222070	Lrrc8	2.57e-09	1.74671	NM_177725.2
ILMN_188786	Tyk2	2.58e-09	-2.46162	NM_018793.1
ILMN_209321	Ets2	2.58e-09	-2.41064	NM_011809.2
ILMN_211951	Cdk5rap3	2.59e-09	-2.03663	NM_030248.1
ILMN_213608	Nol3	2.59e-09	-1.80085	NM_030152.4
ILMN_215504	Large	2.6e-09	-2.39092	NM_010687.1
ILMN_213255	Sh3glb2	2.6e-09	2.13408	NM_139302.1
ILMN_248474	Unc84b	2.61e-09	-1.75483	NM_194342.1
ILMN_256033	Acpl2	2.62e-09	-1.5974	NM_153420.2
ILMN_223381	Lysmd1	2.63e-09	1.74561	NM_153121.1
ILMN_216364	Nat5	2.64e-09	1.97208	NM_026425.1
ILMN_210437	Emp3	2.65e-09	-1.63531	NM_010129.1
ILMN_211914	Txlnb	2.65e-09	-2.08097	NM_138628.1
ILMN_213203	Klhdc2	2.66e-09	1.52288	NM_027117.1
ILMN_208822	Cd28	2.66e-09	-1.54422	NM_007642.2
ILMN_212068	Ndn	2.67e-09	-1.60947	NM_010882.3
ILMN_223656	1810020D17Rik	2.69e-09	-1.81127	NM_183251.2
ILMN_217232	3110049J23Rik	2.73e-09	1.61977	NM_026085.2
ILMN_216755	Pcca	2.73e-09	1.75609	NM_144844.1
ILMN_217477	Rnf167	2.73e-09	1.73651	NM_027445.1
ILMN_223518	Chrd	2.75e-09	-3.41591	NM_009893.1
ILMN_246554	Rbm9	2.77e-09	-1.81611	NM_175387.2
ILMN_220103	Pim3	2.77e-09	2.76911	NM_145478.1
ILMN_211617	Pdlim2	2.78e-09	-1.68409	NM_145978.1
ILMN_187199	Vim	2.8e-09	-1.81693	NM_011701.3
ILMN_217910	Ahdc1	2.81e-09	-2.11514	NM_146155.3
ILMN_184478	5930418K15Rik	2.81e-09	-1.93934
ILMN_210760	Cd55	2.82e-09	-1.66254	NM_010016.2
ILMN_223124	1110032A13Rik	2.82e-09	1.85421	NM_199197.1
ILMN_220153	Mfsd1	2.84e-09	-2.12839	NM_025813.3
ILMN_223199	Nsf	2.84e-09	1.61857	NM_008740.4
ILMN_219740	Psca	2.84e-09	2.05044	NM_028216.1
ILMN_222144	Mrpl2	2.88e-09	2.40352	NM_025302.3
ILMN_214762	Naca	2.9e-09	1.89921	NM_013608.2
ILMN_210050	St5	2.91e-09	-1.73961	NM_029811.2
ILMN_204025	A630097D09Rik	2.95e-09	-2.33791	AK042500
ILMN_200073	LOC385699	2.95e-09	-1.89581	XM_358915.1
ILMN_213406	Asns	2.97e-09	1.84033	NM_012055.1
ILMN_241664	1300018I17Rik	2.98e-09	1.69226	XM_925142.3
ILMN_238927	Ccdc58	2.99e-09	1.84755	NM_198645.1
ILMN_237097	5730409G15Rik	3.02e-09	1.95289	NM_027446.2
ILMN_212352	Ankrd1	3.03e-09	-2.82386	NM_013468.3
ILMN_253256	Itfg3	3.07e-09	1.90933	NM_207217.3
ILMN_212941	Cideb	3.15e-09	1.70481	NM_009894.2
ILMN_209221	Spink4	3.18e-09	2.58881	NM_011463.1
ILMN_187044	D1Ertd471e	3.19e-09	-1.67009
ILMN_219689	Ghr	3.22e-09	-1.83772	NM_010284.2
ILMN_235220	Mapk6	3.23e-09	-1.84907	NM_027418.1
ILMN_255403	Tmem65	3.23e-09	-1.74169	NM_175212.4
ILMN_246671	Mfsd2	3.23e-09	-1.60349	NM_029662.1
ILMN_208831	5730449L18Rik	3.23e-09	-1.58054	NM_025677.1
ILMN_201779	2810404O06Rik	3.25e-09	1.65584	AK012987
ILMN_212495	Cdk2ap2	3.3e-09	2.14883	NM_026373.3
ILMN_230213	3300005D01Rik	3.3e-09	-1.68681	XM_987107.2
ILMN_217868	Pptc7	3.31e-09	2.67256	NM_177242.4
ILMN_312283	LOC671878	3.32e-09	-2.20789	XM_001473434.1
ILMN_252552	Mrto4	3.34e-09	1.75637	NM_023536.2
ILMN_215869	Jph1	3.35e-09	-1.89231	NM_020604.1
ILMN_243440	Cox18	3.36e-09	1.71069	NM_001033310.2
ILMN_209438	Fam173a	3.37e-09	1.65105	NM_145410.3
ILMN_235883	Gls	3.37e-09	1.65957	XM_984943.1
ILMN_237434	Usp13	3.38e-09	-2.05127	NM_001013024.2
ILMN_214011	Mrpl3	3.42e-09	1.82661	NM_053159.3
ILMN_209825	Mrpl28	3.43e-09	1.918	NM_024227.2
ILMN_246204	Als2cr4	3.44e-09	-1.52452	NM_001037812.1
ILMN_215440	Ftl1	3.46e-09	-1.89546	NM_010240.1
ILMN_195635	Tssc6	3.46e-09	-1.63982	AY039000
ILMN_195524	Vamp4	3.47e-09	-1.56958	NM_016796.2
ILMN_244514	2810474O19Rik	3.48e-09	-3.01051	NM_026054.2
ILMN_221145	Sh3glb1	3.48e-09	-1.94794	NM_019464.2
ILMN_215186	Bbs7	3.49e-09	-1.7293	NM_027810.2
ILMN_222417	Ddx20	3.49e-09	1.82391	NM_017397.2
ILMN_215161	Rasal2	3.51e-09	-2.07861	NM_177644.4
ILMN_219263	A430005L14Rik	3.51e-09	1.61827	NM_175287.3
ILMN_215785	Atg12	3.52e-09	-1.85907	NM_026217.1
ILMN_210609	Acad9	3.53e-09	1.60592	NM_172678.2
ILMN_257079	Cetn4	3.53e-09	-1.51233	NM_145825.1
ILMN_230229	Adrbk1	3.54e-09	-1.58546	NM_130863.1
ILMN_222799	Slmo2	3.54e-09	1.86256	NM_025531.2
ILMN_247974	Dph1	3.55e-09	1.58056	NM_144491.2
ILMN_209977	Cnot10	3.55e-09	1.94239	NM_153585.4
ILMN_254575	Ampd3	3.58e-09	-1.66893	NM_009667.2
ILMN_252833	2310047M10Rik	3.62e-09	2.25091	NM_028005.3
ILMN_211098	Csda	3.62e-09	-1.81871	NM_139117.2
ILMN_214933	Cd63	3.63e-09	-1.62237	NM_007653.3
ILMN_219104	Myh2	3.66e-09	-1.65903	NM_144961.1
ILMN_219178	St8sia2	3.67e-09	-1.91247	NM_009181.1
ILMN_185448	Zfp36l1	3.68e-09	-2.34583	NM_007564.4
ILMN_230079	Nat11	3.69e-09	2.14688	XM_912399.2
ILMN_224572	S100a11	3.69e-09	-1.77814	NM_016740.3
ILMN_221739	4732496O08Rik	3.76e-09	1.906	NM_172877.2
ILMN_219481	Aph1a	3.78e-09	2.01965	NM_146104.2
ILMN_231724	Mrpl44	3.8e-09	2.12477	NM_001081210.1
ILMN_223365	Glud1	3.8e-09	1.80815	NM_008133.2
ILMN_249105	Clip4	3.83e-09	-1.78681	NM_030179.2
ILMN_219486	Degs1	3.84e-09	-1.6236	NM_007853.4
ILMN_202499	2010001F03Rik	3.85e-09	1.54251	AK008004
ILMN_216865	Hist1h2be	3.87e-09	-1.50958	NM_178194.3
ILMN_214469	H3f3b	3.89e-09	-1.67845	NM_008211.3
ILMN_222250	Patl1	3.92e-09	1.86777	NM_172635.2
ILMN_228028	Cdc2l6	3.92e-09	-1.55399	NM_198164.2
ILMN_212397	Neurl	3.95e-09	-2.37627	NM_021360
ILMN_231841	Cox5b	3.98e-09	2.37756	NM_009942.2
ILMN_243604	1500032L24Rik	3.99e-09	1.69283	NM_026914.1
ILMN_217898	Ndufa1	4e-09	1.71085	NM_019443.2
ILMN_210362	Ggt7	4.01e-09	1.60697	NM_144786.1
ILMN_239901	Ext2	4.01e-09	-1.86555	NM_010163.1
ILMN_234301	EG245651	4.02e-09	2.39002	XM_908302.2
ILMN_312047	LOC100047934	4.02e-09	-1.98628	XM_001478074.1
ILMN_211541	Asah1	4.04e-09	-2.00217	NM_019734.1
ILMN_188231	Tpbg	4.06e-09	-1.83797	NM_011627.3
ILMN_216237	Schip1	4.07e-09	-2.01857	NM_013928.2
ILMN_219719	Pfkfb4	4.13e-09	1.93088	NM_173019.5
ILMN_189219	Tulp4	4.15e-09	-2.55493	NM_054040.2
ILMN_211973	Rai14	4.19e-09	-1.87761	NM_030690.2
ILMN_312512	LOC100046690	4.19e-09	-2.43916	XM_001476775.1
ILMN_244912	Nudt18	4.21e-09	-1.74171	NM_153136.4
ILMN_205851	A730024G14Rik	4.23e-09	-2.25778	AK042789
ILMN_192976	2310014F06Rik	4.24e-09	-1.5032	XM_489201
ILMN_209519	1700113I22Rik	4.25e-09	-1.95175	NM_026865.2
ILMN_210863	Suds3	4.25e-09	1.75173	NM_178622.3
ILMN_220739	Gal3st1	4.27e-09	1.62038	NM_016922.2
ILMN_221016	Lias	4.27e-09	1.63288	NM_024471.4
ILMN_196366	Taok1	4.28e-09	-1.89183	NM_144825.2
ILMN_190837	1110059G02Rik	4.31e-09	-2.15913
ILMN_325877	Fer1l3	4.32e-09	-1.8024	XM_001480162.1
ILMN_211242	Popdc2	4.32e-09	-1.62599	NM_022318.2
ILMN_208703	Rab3d	4.38e-09	-1.51311	NM_031874.4
ILMN_202928	5330430P07Rik	4.39e-09	1.70023	AK030554
ILMN_186217	1700120C14Rik	4.4e-09	-1.572
ILMN_217866	Rras2	4.41e-09	-2.01368	NM_025846.1
ILMN_229523	Dysf	4.44e-09	-1.93382	NM_021469.2
ILMN_196778	Ifitm1	4.46e-09	-1.84949	NM_026820.2
ILMN_229928	Parp6	4.5e-09	1.66657	NM_029922.2
ILMN_211589	Ndufa12	4.51e-09	1.88237	NM_025551.3
ILMN_247005	Gps2	4.52e-09	1.59889	NM_019726.3
ILMN_223890	Etv5	4.53e-09	-1.54238	NM_023794
ILMN_196311	Mybbp1a	4.56e-09	1.57736	NM_016776
ILMN_212921	BC022687	4.56e-09	-1.89411	NM_145450.3
ILMN_214284	Lman1l	4.56e-09	-1.90996	NM_199222.1
ILMN_212164	Rgma	4.58e-09	-2.72061	NM_177740.4
ILMN_218722	Flot1	4.6e-09	-1.90792	NM_008027.2
ILMN_235057	0610025P10Rik	4.61e-09	2.06402	NM_001013414.1
ILMN_216348	Fermt2	4.65e-09	-1.64688	NM_146054.2
ILMN_236833	Zfyve26	4.67e-09	-1.5759	NM_001008550.1
ILMN_244678	Rasl12	4.68e-09	-1.9641	NM_001033158.1
ILMN_216913	Phc1	4.68e-09	-2.06181	NM_007905.1
ILMN_188259	Tollip	4.68e-09	-1.76492	NM_023764.2
ILMN_240341	Acsl5	4.71e-09	-1.58842	NM_027976.2
ILMN_210527	Atp6ap2	4.77e-09	-1.82988	NM_027439.2
ILMN_186352	scl0002720.1_68	4.77e-09	2.40214	AK053156.1
ILMN_214449	Ppan	4.78e-09	1.69017	NM_145610
ILMN_210952	Gpr172b	4.79e-09	1.54243	NM_029643.2
ILMN_214137	Nap1l1	4.87e-09	-2.10058	NM_015781.3
ILMN_215390	Cxcl12	4.87e-09	-1.70979	NM_013655.2
ILMN_214253	Akap10	4.88e-09	1.61679	NM_019921.2
ILMN_209696	Lin7b	4.89e-09	1.58556	NM_011698.1
ILMN_221927	Fam164a	4.92e-09	-1.62436	NM_173181.3
ILMN_216711	Thop1	4.93e-09	-1.94506	NM_022653.3
ILMN_218472	Pnkp	4.96e-09	1.82671	NM_021549.2
ILMN_226638	Ryr1	4.98e-09	-2.37249	NM_009109.2
ILMN_261781	Adamts7	4.99e-09	-1.73123	NM_001003911.2
ILMN_313836	2810001G20Rik	5.01e-09	1.58269	XM_001476904.1
ILMN_186746	scl0003073.1_164	5.04e-09	-2.96134	BC022635.1
ILMN_247827	Trub1	5.05e-09	1.57173	NM_028115.2
ILMN_223225	Slc19a2	5.05e-09	1.91772	NM_054087.2
ILMN_203004	5930429A15Rik	5.05e-09	-1.69297	AK031203
ILMN_216487	Tes	5.06e-09	-1.8789	NM_011570.3
ILMN_218298	Gins4	5.1e-09	-1.76793	NM_024240.3
ILMN_249313	Nusap1	5.11e-09	-1.764	NM_001042652.1
ILMN_213716	Mbc2	5.15e-09	-2.4248	NM_011843.2
ILMN_257638	Trim25	5.15e-09	-1.5697	NM_009546.2
ILMN_253828	Ppp1r3f	5.15e-09	1.56285	NM_138605.2
ILMN_323613	LOC100045280	5.15e-09	-2.18438	XM_001473988.1
ILMN_188730	Zfp281	5.17e-09	-1.72465	NM_177643.3
ILMN_203097	6430402L23Rik	5.2e-09	2.01156	AK078178
ILMN_236502	BC002163	5.2e-09	2.31346	NR_002445.2
ILMN_213311	3110057O12Rik	5.22e-09	1.64991	NM_026622.2
ILMN_220771	Tex2	5.24e-09	1.51877	NM_198292.3
ILMN_209676	Sdhd	5.24e-09	2.26543	NM_025848.2
ILMN_216977	Mterfd2	5.36e-09	1.99049	NM_178051.3
ILMN_213418	Ptp4a3	5.39e-09	-1.89241	NM_008975.2
ILMN_217954	Rg9mtd1	5.43e-09	2.19927	NM_029092.2
ILMN_218312	Srp14	5.43e-09	-1.77637	NM_009273.4
ILMN_215528	Ghitm	5.45e-09	2.63582	NM_078478.3
ILMN_242952	100041294	5.48e-09	1.5999	NM_011509.1
ILMN_221852	Coasy	5.52e-09	1.68785	NM_027896.4
ILMN_211935	Mal	5.56e-09	1.6218	NM_010762.4
ILMN_220986	Arhgdig	5.63e-09	-2.02665	NM_008113.3
ILMN_225319	Ypel5	5.66e-09	1.59572	NM_027166.5
ILMN_226732	2310044G17Rik	5.72e-09	1.65377	NM_173735.2
ILMN_213652	Armcx2	5.76e-09	-1.72339	NM_026139.3
ILMN_217494	Atp1b3	5.77e-09	-1.72076	NM_007502.3
ILMN_190891	C920004C08Rik	5.78e-09	-2.24211
ILMN_194942	Ugcg	5.78e-09	-2.14446	NM_011673
ILMN_244664	Gorasp1	5.79e-09	1.58434	NM_028976.2
ILMN_211811	Ablim3	5.81e-09	-2.20124	NM_198649.2
ILMN_205429	E330031I04Rik	5.83e-09	1.73924	AK054486
ILMN_216152	Pnpo	5.83e-09	1.58369	NM_134021.2
ILMN_250608	Dlg5	5.85e-09	-1.7708	XM_981375.2
ILMN_212994	Psmd10	5.87e-09	-1.78681	NM_016883.3
ILMN_226588	Garnl4	5.88e-09	-2.11052	NM_001015046.2
ILMN_185384	Extl1	5.89e-09	1.68394	NM_019578
ILMN_196582	Ap1gbp1	5.89e-09	-1.72116	NM_194341.1
ILMN_214596	Ecsit	5.9e-09	1.99531	NM_012029.1
ILMN_184461	2200002D01Rik	5.95e-09	-1.61942
ILMN_235590	Thoc6	5.96e-09	1.97762	NM_001008425.1
ILMN_222886	C630025L14	5.96e-09	1.81779	NM_172489.1
ILMN_211732	9130005N14Rik	6.03e-09	-1.85859	NM_026667.2
ILMN_229062	Ptpla	6.06e-09	-2.10196	NM_001012396.2
ILMN_234300	Trnt1	6.1e-09	1.61268	NM_027296.2
ILMN_213664	Tmem218	6.11e-09	1.58317	NM_025464.2
ILMN_189146	Tubb5	6.21e-09	-1.78108	NM_011655.4
ILMN_222318	Hn1l	6.21e-09	-1.57349	NM_198937.2
ILMN_185042	Usp38	6.22e-09	1.96231	NM_027554.2
ILMN_221178	Klf6	6.22e-09	-2.26135	NM_011803.2
ILMN_239992	1110007M04Rik	6.22e-09	2.28946	NM_026742.3
ILMN_217741	Apbb2	6.25e-09	-1.7666	NM_009686.1
ILMN_215216	Tmem53	6.26e-09	2.10839	NM_026837.1
ILMN_220837	Mlf2	6.26e-09	1.52991	NM_145385.1
ILMN_259520	Angptl4	6.33e-09	-2.49795	NM_020581.1
ILMN_212961	Nudt4	6.34e-09	-1.81756	NM_027722.2
ILMN_212620	Stub1	6.35e-09	2.00979	NM_019719.3
ILMN_254698	Acaa2	6.36e-09	1.77272	NM_177470.2
ILMN_215984	Mgp	6.38e-09	-2.19581	NM_008597.3
ILMN_236430	Spryd4	6.39e-09	1.78794	NM_025716.2
ILMN_216760	9130213B05Rik	6.44e-09	1.55647	NM_145562.2
ILMN_208679	Mat2b	6.46e-09	2.22213	NM_134017.1
ILMN_248745	2310015B20Rik	6.48e-09	-2.61527	XM_907184.2
ILMN_260769	2310022M17Rik	6.5e-09	-1.86972	NM_001024919.1
ILMN_223133	Syap1	6.53e-09	-1.80899	NM_025932.1
ILMN_198012	LOC231444	6.54e-09	1.69522	XM_124565.3
ILMN_248387	2810410C14Rik	6.55e-09	1.64044	NM_175471.2
ILMN_211071	Mrpl11	6.62e-09	1.93546	NM_025553.3
ILMN_246401	Aldh5a1	6.63e-09	1.88427	NM_172532.2
ILMN_215473	Gdnf	6.63e-09	-1.65563	NM_010275.2
ILMN_186551	Vapb	6.65e-09	2.0011	NM_019806.5
ILMN_219950	Mtap7d1	6.68e-09	-2.07014	NM_144941.2
ILMN_220645	Ppp5c	6.69e-09	2.32557	NM_011155.1
ILMN_227746	Zmiz2	6.8e-09	2.65212	NM_028601.2
ILMN_193899	Ugp2	6.81e-09	-1.87997	NM_139297.4
ILMN_237863	Arhgap29	6.83e-09	-1.87771	NM_172525.2
ILMN_217648	6720469N11Rik	6.92e-09	-1.56708	NM_177138.2
ILMN_218559	Hr	7.01e-09	1.67405	NM_021877.2
ILMN_217983	Slc27a1	7.06e-09	1.68614	NM_011977.2
ILMN_189304	Wnt10a	7.11e-09	-2.48427	NM_009518.1
ILMN_214902	Ctns	7.15e-09	-1.61957	NM_031251.4
ILMN_211395	Gng13	7.19e-09	1.69813	NM_022422.4
ILMN_221944	2410042D21Rik	7.2e-09	-2.35005	NM_024254.2
ILMN_212149	Osmr	7.21e-09	-1.97266	NM_011019.1
ILMN_185002	2310014D11Rik	7.32e-09	-2.0003
ILMN_212253	Ppa2	7.37e-09	1.80715	NM_146141.1
ILMN_219978	Afap1l1	7.46e-09	-2.04062	NM_178928.4
ILMN_228891	Akap6	7.51e-09	-1.63095	NM_198111.2
ILMN_210523	Rnf19a	7.55e-09	-1.71952	NM_013923.2
ILMN_218650	Socs6	7.62e-09	-1.95006	NM_018821.3
ILMN_257355	EG216185	7.67e-09	-1.74511	XM_911906.3
ILMN_222259	Dhcr24	7.72e-09	-2.44461	XM_131538.1
ILMN_319037	2810025M15Rik	7.72e-09	-1.79722	XR_035184.1
ILMN_232533	1600021P15Rik	7.74e-09	-1.56751	NM_177718.3
ILMN_185146	Zkscan6	7.77e-09	-1.59699	NM_026107.2
ILMN_223377	Cxcl1	7.87e-09	-5.83219	NM_008176.1
ILMN_210432	Amdhd2	7.94e-09	-1.85317	NM_172935.2
ILMN_316523	LOC100046469	7.94e-09	1.50508	XM_001476518.1
ILMN_212080	Zbtb7c	7.97e-09	-1.6663	NM_145356.3
ILMN_192532	Tsta3	8.01e-09	1.75518	NM_031201.1
ILMN_214893	Sepx1	8.05e-09	1.91178	NM_013759.2
ILMN_314590	LOC100046264	8.07e-09	1.601	XM_001476094.1
ILMN_223487	Actn2	8.08e-09	-1.95534	NM_033268.2
ILMN_237944	Wwtr1	8.12e-09	-1.95986	NM_133784.2
ILMN_211756	Fbxo40	8.22e-09	-2.03482	XM_156082.3
ILMN_219487	Sh3kbp1	8.32e-09	-1.79283	NM_021389.3
ILMN_242087	Timp1	8.39e-09	-1.90814	NM_011593.2
ILMN_242680	Cox7b	8.41e-09	2.25842	NM_025379.2
ILMN_202281	1110001N06Rik	8.46e-09	1.52882	AK003256
ILMN_188683	Wbp1	8.49e-09	1.57922	NM_016757.1
ILMN_222460	Bap1	8.6e-09	1.93994	NM_027088.1
ILMN_193286	mtDNA_ND3	8.6e-09	1.72538
ILMN_190416	mt-Nd1	8.66e-09	1.61297
ILMN_188567	Wisp1	8.66e-09	-1.831	NM_018865.2
ILMN_317497	LOC100044170	8.69e-09	-1.73703	XM_001471743.1
ILMN_311954	LOC100048301	8.74e-09	1.54463	XM_001480232.1
ILMN_233225	Rps4x	8.75e-09	-1.90885	NM_009094.1
ILMN_218908	Men1	8.76e-09	1.75584	NM_008583.1
ILMN_256957	Sin3a	8.84e-09	1.86745	NM_011378.1
ILMN_244634	0610010E21Rik	8.9e-09	2.03928	NM_001033140.3
ILMN_209290	Slc25a24	9e-09	-1.79668	NM_172685.3
ILMN_310231	Ttc28	9.01e-09	-1.72801	XM_001476544.1
ILMN_208867	Stambp	9.09e-09	-1.88341	NM_024239.1
ILMN_208743	Pscd1	9.24e-09	1.72003	NM_011180.2
ILMN_217581	Edg5	9.25e-09	-1.72742	NM_010333
ILMN_209284	Sgcb	9.25e-09	-2.02039	NM_011890.4
ILMN_250177	Eif3f	9.25e-09	-1.54013	NM_025344.1
ILMN_210462	AI646023	9.37e-09	1.66646	NM_198860.1
ILMN_313385	H2afv	9.39e-09	-1.66787	XM_001476068.1
ILMN_195969	Trit1	9.4e-09	1.52419	NM_025873.1
ILMN_223350	Myod1	9.57e-09	-2.56783	NM_010866.1
ILMN_245700	Kctd17	9.59e-09	1.55792	NM_001081367.1
ILMN_210159	2310016M24Rik	9.65e-09	1.56881	NM_183256.2
ILMN_187207	Trip12	9.66e-09	-1.62383	NM_133975.4
ILMN_217595	Irak2	9.75e-09	-1.89948	NM_172161.2
ILMN_211603	Fbxo34	9.76e-09	1.59601	NM_030236.1
ILMN_205483	D030049N18Rik	9.83e-09	-1.84113	AK050983
ILMN_217053	Lass6	9.84e-09	-1.50987	NM_172856.3
ILMN_210681	Hdhd3	9.85e-09	1.93751	NM_024257.1
ILMN_244031	Cyb5	9.89e-09	-1.59424	NM_025797.3
ILMN_209705	Mum1	9.92e-09	-1.78019	NM_023431.5
ILMN_204142	B230323K17Rik	9.93e-09	1.62537	AK045923
ILMN_215917	Immt	9.98e-09	2.42018	NM_029673.2
ILMN_214654	Mre11a	9.99e-09	-1.58018	NM_018736.2
ILMN_219676	Cnnm2	1.02e-08	-1.59805	NM_033569.2
ILMN_236930	Dync1i2	1.02e-08	-1.6816	NM_010064.1
ILMN_222505	Tmem132a	1.04e-08	-2.09956	NM_133804.2
ILMN_237659	Sdcbp	1.04e-08	-1.87114	NM_016807.1
ILMN_190786	Prkg1	1.05e-08	-1.88216	NM_011160
ILMN_213111	Rpe	1.05e-08	-1.56279	NM_025683.2
ILMN_222389	Gsdmdc1	1.05e-08	-1.74159	NM_026960.1
ILMN_218989	Arpc5	1.05e-08	-1.62012	NM_026369.1
ILMN_227363	2310001H12Rik	1.06e-08	-1.52883	XM_901486.2
ILMN_213943	Bola2	1.06e-08	-1.62308	NM_175103.2
ILMN_196733	Hist1h2af	1.06e-08	-2.01645	NM_175661.1
ILMN_209015	2310008H09Rik	1.07e-08	1.6696	NM_023197.1
ILMN_210929	Cldn12	1.07e-08	-1.64912	NM_022890.1
ILMN_233192	Epb4.1	1.08e-08	1.79623	NM_183428.2
ILMN_221882	Snai1	1.08e-08	-1.53332	NM_011427.2
ILMN_216940	Hist1h2bc	1.08e-08	-1.68043	NM_023422.3
ILMN_186306	Zbtb5	1.09e-08	1.71934	NM_173399.2
ILMN_223526	Camk2g	1.13e-08	-1.5813	NM_178597.4
ILMN_246342	LOC674611	1.14e-08	-1.78468	XM_980150.1
ILMN_214528	Pdzrn3	1.16e-08	-1.75416	NM_018884.1
ILMN_221662	E2f1	1.16e-08	-1.88645	NM_007891.3
ILMN_211010	Akt3	1.16e-08	-1.51592	NM_011785.2
ILMN_219020	2310061C15Rik	1.16e-08	2.12612	NM_026844.3
ILMN_212196	Ostm1	1.17e-08	-1.62257	NM_172416.2
ILMN_217965	Hsd17b12	1.17e-08	-1.66471	NM_019657.2
ILMN_209259	Prkx	1.18e-08	-1.74441	NM_016979.1
ILMN_215818	Prmt3	1.19e-08	-1.58039	NM_133740.1
ILMN_218963	Csgalnact1	1.19e-08	-1.77815	NM_172753.3
ILMN_211906	Tmem60	1.19e-08	1.79875	NM_177601.3
ILMN_234824	Ikbkap	1.22e-08	-1.67399	NM_026079.2
ILMN_224099	Ngef	1.22e-08	-1.85856	NM_019867
ILMN_198223	LOC225058	1.22e-08	-1.75603	XM_140116.1
ILMN_215751	Rin2	1.23e-08	-1.7239	NM_028724.2
ILMN_210320	4933436C20Rik	1.23e-08	-1.55154	XM_486143
ILMN_252657	Pacsin3	1.24e-08	-2.68081	NM_030880.1
ILMN_215793	Trmt2b	1.24e-08	1.88257	NM_172540.1
ILMN_210943	l7Rn6	1.25e-08	1.68317	NM_026304.2
ILMN_212740	Btg1	1.25e-08	-2.07496	NM_007569.1
ILMN_212464	Tarsl2	1.25e-08	1.87623	NM_172310.1
ILMN_209797	Rbm19	1.25e-08	1.85285	NM_028762.1
ILMN_215852	Acot8	1.26e-08	1.7524	NM_133240.1
ILMN_220253	BC003331	1.26e-08	-1.56643	NM_145511.1
ILMN_218972	Obfc1	1.26e-08	-1.928	NM_175360.2
ILMN_244512	Phpt1	1.27e-08	1.85108	NM_029293.2
ILMN_327707	Tns3	1.27e-08	-1.73818	NM_001083587.1
ILMN_259483	Ccdc86	1.27e-08	-1.55914	NM_023731.2
ILMN_210509	Riok3	1.27e-08	-1.68304	NM_024182.4
ILMN_208716	Nr1i3	1.28e-08	1.64976	NM_009803.4
ILMN_220130	Mdm2	1.29e-08	-1.50101	NM_010786.2
ILMN_213855	2310008M10Rik	1.29e-08	-1.55497	NM_025509.2
ILMN_215615	Gyg	1.29e-08	-2.14516	NM_013755.2
ILMN_211293	Eif4e3	1.3e-08	1.89865	NM_025829.2
ILMN_215780	Exosc5	1.3e-08	1.97966	NM_138586.1
ILMN_213138	Cab39l	1.31e-08	-2.00298	NM_026908.3
ILMN_214326	Blmh	1.31e-08	-1.9307	NM_178645.3
ILMN_232254	1700037H04Rik	1.32e-08	1.70767	NM_026091.2
ILMN_244313	2610036L11Rik	1.32e-08	-1.93098	XM_488549.3
ILMN_184281	Zdhhc7	1.32e-08	2.09628	NM_133967.3
ILMN_221078	Snap29	1.33e-08	-1.78628	NM_023348.4
ILMN_217804	Tbx15	1.33e-08	-2.10438	NM_011534.1
ILMN_211560	Hdgfrp2	1.34e-08	1.58968	NM_008233.2
ILMN_199361	Klk1b4	1.34e-08	1.86884	NM_010915.1
ILMN_212903	Tmem38a	1.34e-08	-1.89341	NM_144534.1
ILMN_209543	Jtv1	1.35e-08	-1.71957	NM_146165.1
ILMN_221605	Tiam1	1.35e-08	-1.72247	NM_009384.2
ILMN_221578	Lrrc46	1.36e-08	1.51352	NM_027026.2
ILMN_216481	Smad1	1.36e-08	-1.58922	NM_008539.3
ILMN_259298	Ppm1m	1.36e-08	1.6157	NM_026447.2
ILMN_228959	Calr4	1.36e-08	-1.53995	NM_001033226.2
ILMN_254166	Slc12a3	1.37e-08	1.60229	NM_019415.1
ILMN_257414	B3galnt2	1.38e-08	-1.87705	NM_178640.2
ILMN_222751	Sart3	1.38e-08	1.81649	NM_016926.1
ILMN_213159	Mir16	1.38e-08	1.98706	NM_019580.3
ILMN_210211	Cav3	1.39e-08	-2.28797	NM_007617.2
ILMN_217932	Acadl	1.39e-08	1.71834	NM_007381.2
ILMN_214404	1110018J18Rik	1.39e-08	1.66438	NM_025370.2
ILMN_192724	1500005K14Rik	1.4e-08	-1.63396	XM_203453
ILMN_221787	1110012N22Rik	1.41e-08	1.62341	XM_126634.3
ILMN_219881	H19	1.42e-08	-2.96685	NR_001592.1
ILMN_210635	Enpp1	1.42e-08	-1.70881	NM_008813.2
ILMN_213212	Rbms3	1.42e-08	-2.00178	NM_178660.2
ILMN_209245	Polr3h	1.42e-08	-2.01065	NM_030229.4
ILMN_211031	Serpinb6b	1.43e-08	-1.52703	NM_011454.1
ILMN_216776	Slc35c1	1.44e-08	1.65175	NM_145832.3
ILMN_196367	Rpap2	1.45e-08	-1.67097	NM_144911.1
ILMN_217102	Nrap	1.45e-08	-1.51348	NM_198059.2
ILMN_223697	Sh3tc1	1.47e-08	1.91011	NM_194344.1
ILMN_218574	Nope	1.47e-08	-2.16706	NM_020043.2
ILMN_208834	Trabd	1.48e-08	1.70287	NM_026485.2
ILMN_252787	Ccdc80	1.49e-08	-1.9209	NM_026439.2
ILMN_245249	Fbxl4	1.5e-08	-1.55786	NM_172988.1
ILMN_209554	Ppp2r5d	1.5e-08	1.99215	NM_009358.2
ILMN_214591	Klhdc1	1.5e-08	-1.51471	NM_178253.2
ILMN_213753	Wdr55	1.51e-08	-1.68992	NM_026464.2
ILMN_259885	EG434168	1.52e-08	1.62263	XM_973360.2
ILMN_217393	Ufsp2	1.52e-08	1.50377	NM_138668.1
ILMN_216656	B830045N13Rik	1.54e-08	-1.70465	NM_153539.2
ILMN_213434	Ppp2r2d	1.55e-08	1.56229	NM_026391.2
ILMN_257155	Dnajc19	1.56e-08	2.11746	NM_001026211.1
ILMN_216560	Fam132b	1.56e-08	-1.67479	NM_173395.2
ILMN_209787	P42pop	1.56e-08	1.50088	NM_145579.2
ILMN_219138	Depdc6	1.57e-08	-1.99631	NM_145470.2
ILMN_252404	9430016H08Rik	1.58e-08	1.78294	XM_907464.2
ILMN_261196	Yif1b	1.58e-08	2.16933	NM_029887.2
ILMN_187004	2610030H06Rik	1.59e-08	-2.0382	XM_110750
ILMN_317267	Abhd1	1.61e-08	-2.06757	NR_003522.1
ILMN_220172	Evi2a	1.65e-08	-1.64866	NM_010161.3
ILMN_213058	BC023835	1.65e-08	1.60645	NM_172116
ILMN_255681	Plekhm3	1.65e-08	-1.58213	NM_001039493.1
ILMN_209509	Camk2a	1.66e-08	-2.22449	NM_177407.3
ILMN_187838	Uqcr	1.69e-08	1.69122	NM_025650.2
ILMN_230376	Cdv3	1.69e-08	-1.95008	NM_175565.3
ILMN_222379	Bcl6	1.69e-08	-1.99527	NM_009744.3
ILMN_214644	1810055G02Rik	1.7e-08	-1.67119	NM_028077.2
ILMN_196725	Hist1h4m	1.7e-08	-1.72972	NM_175657.1
ILMN_222356	Col5a1	1.72e-08	-1.92086	NM_015734.1
ILMN_214035	Ankrd2	1.74e-08	-1.8708	NM_020033.1
ILMN_222450	Dpp7	1.74e-08	-1.83109	NM_031843.2
ILMN_223556	Polg	1.75e-08	1.66938	NM_017462.2
ILMN_205813	4833425P12Rik	1.75e-08	-2.21368	AK039879
ILMN_202721	Acp1	1.75e-08	-1.56388	AK019186
ILMN_224020	Dorz1	1.78e-08	1.70419	NM_145919
ILMN_214521	Rad50	1.78e-08	-1.63795	NM_009012.1
ILMN_220308	Ggta1	1.79e-08	-1.73236	NM_010283.1
ILMN_229304	Cdsn	1.79e-08	1.76647	NM_001008424.2
ILMN_212317	1700112C13Rik	1.8e-08	-1.61525	NM_183103.2
ILMN_250372	Fcgrt	1.81e-08	1.62843	NM_010189.1
ILMN_215031	Psme1	1.83e-08	-1.70211	NM_011189.1
ILMN_245593	Lipn	1.83e-08	1.98352	NM_027340.1
ILMN_216090	Timm8b	1.84e-08	1.87482	NM_013897.1
ILMN_219336	Lox	1.86e-08	-1.97796	NM_010728.1
ILMN_221763	Cul1	1.87e-08	-1.63494	NM_012042.3
ILMN_209464	0610038F07Rik	1.89e-08	1.56994	NM_025333.3
ILMN_199952	LOC384104	1.91e-08	2.13125	XM_357429.1
ILMN_216486	Tgfb1i1	1.92e-08	-1.53726	NM_009365.2
ILMN_212692	Dclk1	1.94e-08	-1.76039	NM_019978.2
ILMN_217875	Grwd1	1.95e-08	1.73228	NM_153419.1
ILMN_211164	Ino80c	1.96e-08	-1.62115	NM_172625.2
ILMN_212955	Hexim1	1.96e-08	1.64122	NM_138753.2
ILMN_203979	Cdon	1.96e-08	-1.83223	AK040711
ILMN_212354	Pdcd4	1.96e-08	-1.91196	NM_011050.3
ILMN_224564	1110038B12Rik	1.97e-08	-1.9326	XM_922038.2
ILMN_216993	Rpa3	1.97e-08	2.1149	NM_026632.3
ILMN_186972	Tpra40	1.97e-08	1.68364	NM_011906.1
ILMN_210747	5730403B10Rik	1.97e-08	1.71571	NM_025670.4
ILMN_230277	Frrs1	1.98e-08	-1.85429	NM_009146.1
ILMN_218758	Mmp15	1.98e-08	-2.6958	NM_008609.3
ILMN_311304	LOC100045782	1.99e-08	1.77789	XM_001475154.1
ILMN_184852	Sec15l1	2e-08	1.5389	NM_175353
ILMN_212377	Ncapd2	2.01e-08	1.77581	NM_146171.1
ILMN_252343	2310003H01Rik	2.04e-08	1.92226	NM_027980.1
ILMN_223317	Fbxo25	2.05e-08	-1.84594	NM_025785.2
ILMN_216415	Nfe2l1	2.05e-08	-1.75993	NM_008686.2
ILMN_211417	Psip1	2.09e-08	-1.73861	NM_133948.2
ILMN_218843	Exoc3l	2.09e-08	-1.98873	NM_177788.4
ILMN_185225	Trim8	2.09e-08	-1.75867	NM_053100.1
ILMN_209868	Casq1	2.09e-08	-2.74715	NM_009813.1
ILMN_220792	Eif4enif1	2.1e-08	1.75299	NM_023743.1
ILMN_217229	Mid1ip1	2.1e-08	-1.89639	NM_026524.2
ILMN_216384	Golph3l	2.11e-08	-1.74932	NM_146133.2
ILMN_210791	Ddx41	2.13e-08	1.95174	NM_134059.1
ILMN_218232	2310005N03Rik	2.13e-08	2.11313	NM_025511.2
ILMN_225654	Il15	2.13e-08	1.70399	NM_008357.1
ILMN_188261	Ywhaz	2.15e-08	-1.73127	NM_011740.2
ILMN_215036	Ak3	2.16e-08	1.74048	NM_021299.1
ILMN_190390	Zfp496	2.16e-08	-1.54021	NM_172941
ILMN_226398	Rbms1	2.17e-08	-1.61444	NM_020296.1
ILMN_185900	1110017F19Rik	2.17e-08	-1.56949
ILMN_211105	Dbf4	2.18e-08	-1.6318	NM_013726.2
ILMN_231165	Slc9a1	2.19e-08	1.56928	NM_016981.2
ILMN_227037	Snx7	2.19e-08	-2.17624	NM_029655.2
ILMN_195929	Zdhhc12	2.19e-08	-1.64436	NM_025428.1
ILMN_208901	Nt5m	2.2e-08	1.94203	NM_134029.2
ILMN_209328	Pex6	2.21e-08	1.85024	NM_145488.1
ILMN_210148	Tgfbr1	2.21e-08	-1.86848	NM_009370.2
ILMN_231829	Nfkbiz	2.22e-08	-1.93094	NM_030612.2
ILMN_223098	Map4k4	2.22e-08	-1.79731	NM_008696.2
ILMN_260531	Snai2	2.22e-08	-1.73559	NM_011415.2
ILMN_240866	Prkag1	2.22e-08	1.87519	NM_016781.2
ILMN_242046	Actn1	2.23e-08	-2.01296	NM_134156.1
ILMN_216089	5330431N19Rik	2.24e-08	2.11	NM_172639.2
ILMN_254719	Unc13d	2.25e-08	-1.84942	NM_001009573.2
ILMN_210818	Adamts2	2.27e-08	-1.76401	NM_175643.2
ILMN_238251	EG633640	2.28e-08	1.57208	NM_001039244.1
ILMN_323674	LOC100048803	2.29e-08	1.52762	XM_001471617.1
ILMN_215120	Hist1h2bk	2.3e-08	-1.58221	NM_175665.1
ILMN_210887	Mtch2	2.34e-08	3.01095	NM_019758.2
ILMN_245343	Fert2	2.34e-08	-1.62781	NM_001037997.1
ILMN_216336	Stag1	2.36e-08	-1.56235	NM_009282.3
ILMN_222051	Robld3	2.36e-08	1.95643	NM_031248.3
ILMN_212897	Dut	2.37e-08	1.54618	NM_023595.5
ILMN_248895	9130011J15Rik	2.37e-08	-1.74888	NM_172396.3
ILMN_187810	Top2a	2.38e-08	-1.70485	NM_011623.1
ILMN_205464	A530065H22Rik	2.39e-08	1.80818	AK041036
ILMN_218006	Nradd	2.39e-08	-1.9002	NM_026012.2
ILMN_222638	Rtn4rl1	2.4e-08	1.50861	NM_177708.5
ILMN_215862	Pgls	2.43e-08	2.03967	NM_025396.3
ILMN_219464	Cdc42se1	2.44e-08	-1.51854	NM_172395.2
ILMN_211337	Mapk11	2.47e-08	-1.59184	NM_011161.4
ILMN_254666	Atp6v1c2	2.51e-08	-1.65657	NM_133699.1
ILMN_232146	Rod1	2.51e-08	-1.70142	NM_144904.1
ILMN_221795	Pitpna	2.51e-08	1.78085	NM_008850.1
ILMN_218190	Tmem117	2.52e-08	-1.8186	NM_178789.4
ILMN_194694	Zfyve21	2.53e-08	-1.56761	NM_026752.2
ILMN_217454	Itpr2	2.54e-08	1.64081	NM_019923.3
ILMN_257135	2210411K11Rik	2.57e-08	1.56135	NM_029384.1
ILMN_245250	Hist1h2bm	2.57e-08	-1.64005	NM_178200.1
ILMN_314790	LOC100045963	2.58e-08	2.31397	XM_001475257.1
ILMN_218196	Chchd6	2.59e-08	1.93833	NM_025351.2
ILMN_241653	Ctsh	2.6e-08	1.56589	NM_007801.1
ILMN_215414	Prpf40b	2.61e-08	1.95239	NM_018786.1
ILMN_209152	Rxrb	2.63e-08	1.9347	NM_011306.3
ILMN_260376	Rps6ka1	2.64e-08	-2.25294	NM_009097.1
ILMN_218155	Scrn2	2.65e-08	1.5058	NM_146027.1
ILMN_195803	scl0001534.1_16	2.66e-08	1.57398	AK041119.1
ILMN_208870	G6pc3	2.66e-08	2.64543	NM_175935.3
ILMN_217702	Isyna1	2.66e-08	1.57617	NM_023627.1
ILMN_214513	Gcnt1	2.67e-08	-1.60924	NM_173442.2
ILMN_219698	Rars2	2.69e-08	1.50219	NM_181406.2
ILMN_233977	Abcf3	2.72e-08	1.52513	NM_013852.2
ILMN_221174	S100a4	2.73e-08	-1.84839	NM_011311.1
ILMN_219224	Magee1	2.73e-08	-2.19319	NM_053201.3
ILMN_209949	Ptpn21	2.74e-08	-2.45793	NM_011877.1
ILMN_196727	Hist1h2ad	2.75e-08	-2.15981	NM_178188.3
ILMN_211556	Vwa5a	2.76e-08	-2.04069	NM_172767.2
ILMN_210700	Flcn	2.76e-08	-1.60572	NM_146018.1
ILMN_208725	Apip	2.8e-08	1.77691	NM_019735.3
ILMN_243396	Tmsb10	2.81e-08	-2.61127	NM_025284.3
ILMN_215403	Ccnb1	2.85e-08	-1.74964	NM_172301.3
ILMN_194464	5031439A09Rik	2.89e-08	-1.67396	NM_026582
ILMN_210229	Car2	2.9e-08	1.71562	NM_009801.3
ILMN_210950	Reps1	2.91e-08	-1.71711	NM_009048.1
ILMN_192959	2010110K16Rik	2.91e-08	1.68662	NM_026442
ILMN_194550	Wfs1	2.91e-08	-2.11138	NM_011716.2
ILMN_211591	Clptm1	2.93e-08	2.05667	NM_019649.2
ILMN_217596	Tmem109	2.93e-08	-1.79963	NM_134142.1
ILMN_212590	Socs2	2.97e-08	-1.88971	NM_007706.3
ILMN_218891	Lrrk1	2.98e-08	-1.75408	NM_146191.3
ILMN_219729	Timp2	2.98e-08	-2.58716	NM_011594.3
ILMN_196492	2310036I02Rik	3e-08	2.28502	XM_128950.4
[truncated: 1,091 more rows]
