# Supplementary material for: PGC-1α and PGC-1β Increase Protein Synthesis via ERRα in C2C12 Myotubes
Source: Front Physiol. 2018 Sep 25;9:1336. doi: 10.3389/fphys.2018.01336 (PMC6190860; doi:10.3389/fphys.2018.01336)
Supplement: Supplementary file 2 [file Table_2.XLSX]

## Sheet: Sheet1
Supplementary File 2. List of genes commonly regulated by both PGC-1α and PGC-1β overexpression, using a 2-fold cut-off. C2C12 myotubes were infected with either GFP, PGC-1α or PGC-1β adenoviruses and RNA was harvested after 72 hours. n = 6 for GFP and PGC-1β, and 3 for PGC-1α.
	Fold-Change	Fold-Change
Gene Symbol	(GFP vs. PGC-1a)	(GFP vs. PGC-1b)
Ckmt2	22.4888	14.2888
Cox7a1	12.0244	12.9624
Hba-a1	11.2018	11.8907
Eef1a2	10.8911	19.5706
LOC226017	9.43606	8.45625
Chchd10	9.42494	11.7154
EG433229	8.68989	9.12973
2310042D19Rik	8.57793	11.009
Psca	6.95644	2.05044
9530058B02Rik	6.59667	9.00154
Atp1b1	6.31741	5.48757
Akr1b7	5.43862	8.74281
BC022224	5.41813	4.74233
Fabp3	4.95574	3.0484
Acy3	4.91602	12.4891
Ckmt1	4.7592	6.81868
Tnni3	4.75276	2.00992
Trib3	4.73965	3.84748
Ppif	4.70796	6.16423
Rpl3l	4.56228	2.92692
Idh3a	4.54067	5.07799
Ogdh	4.47975	4.3944
Ndrg2	4.47653	3.08506
Esrra	4.44013	4.49707
Hcn2	4.38205	7.84074
LOC100047762	4.33089	4.47695
Dlat	4.31837	3.62162
Pdk4	4.30118	2.06258
Fahd1	4.25879	4.43016
Nme7	4.18014	4.23325
Mdh1	4.05988	3.3052
Pdss1	4.04631	4.2878
Slc25a12	4.00075	3.81342
Coq5	3.95895	5.79758
1300001I01Rik	3.88436	5.41256
Slc25a19	3.77834	6.56139
Cpt1b	3.77187	6.89835
Psmb10	3.55044	4.86065
Oxct1	3.51888	4.76789
Ung	3.51663	6.02081
Ddit3	3.51392	4.35318
Tfrc	3.50116	3.45743
1110001J03Rik	3.4523	4.83989
Retsat	3.41484	7.44646
Pnpla2	3.41417	5.98846
Cyc1	3.41326	3.82197
Sdhd	3.40994	2.26543
Aco2	3.40106	3.26508
Itgb1bp3	3.40102	-2.51385
Pptc7	3.39173	2.67256
Twf2	3.37313	3.23464
LOC100044087	3.33118	3.96096
Timm8a1	3.31855	3.17801
Sirt3	3.27855	3.90509
Rilp	3.26875	2.10206
Gdf15	3.24905	3.29538
Sdhb	3.22247	3.60854
Pank1	3.20702	2.49932
Rangrf	3.18549	2.75515
Hagh	3.18118	6.03483
Brp44	3.16959	4.76525
Mrps35	3.16772	2.80765
Upp1	3.15979	5.49239
Cycs	3.15889	4.50023
Ciapin1	3.15393	2.52839
Rhot2	3.13953	3.38444
LOC383897	3.1324	3.03508
Mfn1	3.12606	2.74133
Gbas	3.07884	2.56341
Mrpl12	3.07691	3.85585
Guca2a	3.0513	9.13528
Osbpl1a	3.04936	3.22095
Atp5c1	3.03925	2.08349
BC019806	3.02251	4.54331
2310003L22Rik	3.01807	3.47736
Rsad1	2.99554	3.83025
Cs	2.98552	3.26293
Mrpl47	2.96863	4.61606
Fastkd1	2.96495	2.97608
Vegfb	2.94837	2.8568
Sirt5	2.9366	4.24352
Nudt19	2.92056	6.30011
1110007M04Rik	2.91991	2.28946
Tesc	2.90705	9.9194
Aadacl1	2.90157	3.3228
Uqcrc1	2.86778	3.02182
Atp5a1	2.84889	2.24091
Etfdh	2.83536	4.6634
Serhl	2.82986	3.08036
Rtn4ip1	2.82273	3.45214
Slc2a4	2.81424	4.36825
LOC333331	2.79695	3.95111
Qrsl1	2.79026	2.48561
Ndufa11	2.78401	3.38518
Coq9	2.72871	2.57594
Impa2	2.72808	2.79183
Ndufb5	2.71896	3.02476
Lonp1	2.67536	3.19622
Wipf3	2.67131	2.54084
Acadm	2.66376	3.37281
Fh1	2.66094	3.68258
Alkbh7	2.64898	3.21259
Acadvl	2.64747	4.23267
ENSMUSG00000054212	2.6441	3.54523
Ndufb10	2.64252	2.93627
Mcee	2.63552	3.12424
Gfm1	2.63419	3.5872
1110008P14Rik	2.63289	2.31415
1700020C11Rik	2.63039	2.90757
LOC100046918	2.62943	2.95748
Mdh2	2.60338	3.47344
Pcyt2	2.59746	3.92275
Dlst	2.59719	2.79403
EG433224	2.58692	3.46287
Alas1	2.57755	3.71445
Pvalb	2.57362	5.06905
1700021F05Rik	2.56022	2.5938
Calr3	2.54682	8.46672
0610042C05Rik	2.54621	2.16765
Rmnd1	2.54218	3.56755
Hk1	2.54121	3.19687
Suclg1	2.53992	3.58971
Cox10	2.53889	2.95775
Aim1l	2.53155	7.41193
Fsd2	2.52962	2.65388
Them2	2.51894	2.74049
0610007J10Rik	2.51824	2.49969
2310005E10Rik	2.51783	3.67977
Timm10	2.51258	2.4321
Slc25a11	2.49577	4.26743
2310005N03Rik	2.49027	2.11313
Lace1	2.47654	3.93296
Ndufs7	2.45964	2.28876
1810014F10Rik	2.45359	3.96284
Letm1	2.45338	3.81307
Atp5o	2.44996	2.47279
Peo1	2.44853	2.50852
Sgk3	2.44153	2.90144
Tm6sf1	2.43276	2.91724
Timm44	2.43171	3.18675
Ccbl1	2.41721	5.87811
Actn2	2.41624	-1.95534
Pcolce	2.4144	2.42038
Afg3l2	2.41354	2.79794
Pmm1	2.40038	2.91962
LOC271697	2.39071	3.09835
Rnmtl1	2.39	4.9287
Mrpl34	2.3863	3.62393
Mreg	2.38602	2.86054
Mrpl4	2.38555	3.67741
2010003J03Rik	2.37452	2.46365
Mrps5	2.36696	3.26612
Mrpl15	2.36332	2.74886
Bola3	2.348	2.4373
Ndufa8	2.34651	2.70463
Chchd7	2.32959	3.11726
Hccs	2.32848	2.0244
Atp5sl	2.32694	3.79278
Fastk	2.32093	2.39593
LOC100041835	2.318	2.7046
EG433923	2.31514	3.04942
Ptges2	2.31273	3.57236
Bdh1	2.30554	9.35382
Atp2a3	2.30081	4.78552
Eif1ad	2.29662	4.68672
mt-Nd4l	2.29103	2.0895
Cox7b	2.28876	2.25842
LOC626152	2.25811	2.2864
Lrpprc	2.24552	4.02041
Ddo	2.24247	2.92149
Myl2	2.24091	-3.49082
Ghitm	2.23623	2.63582
Dld	2.23462	2.42359
Slc25a39	2.23087	2.51549
Cox11	2.21542	2.22916
Txn2	2.20417	2.18425
Etfb	2.20272	3.55636
Akr1b8	2.20056	3.7432
Ecsit	2.19903	1.99531
Ndufb7	2.19778	3.85652
Flad1	2.19046	2.56267
Tufm	2.1879	4.59734
Dnaja3	2.17447	2.67051
Uqcrc2	2.1641	2.61477
Mkks	2.15917	2.82476
Mif4gd	2.1572	2.71678
Tsfm	2.15693	3.57006
Rcan2	2.15214	2.13247
Mrpl30	2.14927	2.16475
Phb2	2.14657	3.36005
Sod2	2.14635	2.30596
Ptcd2	2.14615	2.39749
Slc25a34	2.13713	3.39597
Tymp	2.13268	3.03436
Coq6	2.12992	5.12097
C1qbp	2.12788	2.26873
Tbrg4	2.12709	2.51626
Abcd1	2.11877	2.38796
Trak2	2.11675	2.51395
E430039I23Rik	2.1075	2.14026
Foxred1	2.10696	2.02888
Ndufb6	2.10607	2.49528
2310061C15Rik	2.10212	2.12612
Letmd1	2.10078	4.48504
Mrps16	2.10055	4.1042
Spsb4	2.09816	4.48222
Ctsf	2.09145	2.75926
Ndufv2	2.08621	2.21788
D10Jhu81e	2.08118	3.82347
Slc6a17	2.08112	2.11411
BC002163	2.07921	2.31346
Ndufs8	2.07357	2.40616
Stac2	2.06042	2.55984
Etfa	2.05775	2.19525
Adsl	2.05519	2.50424
Atpaf2	2.05393	3.18368
Deb1	2.04464	2.33421
8030451F13Rik	2.04017	-2.11107
Hmox2	2.03698	2.09277
Pdhb	2.03592	2.81064
Spink4	2.03491	2.58881
Mrps27	2.03105	3.8165
Ndufa5	2.02895	2.76964
Dnajc28	2.02305	2.60592
Zadh2	2.01943	3.21976
2400010C15Rik	2.01873	2.12103
Atp5h	2.01028	2.08255
Oxa1l	2.00208	2.54683
Glrx5	2.0009	2.7578
Hspe1	1.99648	3.72441
Mrps18b	1.99585	2.99277
Grpel1	1.99359	4.20678
LOC676974	1.99298	1.98083
Immt	1.98667	2.42018
Mrpl43	1.97822	3.57448
Abhd11	1.97808	2.84255
Mrpl18	1.97486	4.11754
D2Wsu81e	1.95918	2.35189
Mrpl46	1.95548	5.94195
Mrpl55	1.95529	3.59728
Adck1	1.95382	2.42206
Echs1	1.95064	2.6646
Zfand2a	-1.95859	-2.73135
Fam171a2	-1.96027	-4.66568
Prickle3	-1.96101	-2.85982
Gprc5c	-1.96511	-3.67773
6720458D17Rik	-1.96811	-2.08142
Wnt10a	-1.98534	-2.48427
Klhl30	-1.98733	-3.44089
BC065085	-1.99745	-2.37518
Fgf13	-2.01462	-2.70587
Chrd	-2.01646	-3.41591
Mustn1	-2.01918	-5.18454
Myh3	-2.05295	-4.87347
Tas1r1	-2.05388	-2.6833
Egln3	-2.0637	-3.89565
Peg3	-2.0641	-2.57049
Ptgis	-2.06718	-3.41188
Asprv1	-2.06879	-2.12577
Mef2c	-2.07556	-5.79506
Rps6ka1	-2.09305	-2.25294
Gm484	-2.15263	-3.25027
Zmynd17	-2.15633	-3.90053
Hspb3	-2.15647	-2.69159
Reep1	-2.15768	-3.72057
Serpinb9g	-2.16055	-3.97113
Stmn2	-2.16511	-2.16406
Scml4	-2.18637	-3.97889
Hes6	-2.18705	-2.27637
Mcpt8	-2.21841	-2.66562
Prkag3	-2.22696	-4.25819
Ctsa	-2.22752	-2.95597
Mylk	-2.2292	-2.3743
Myoz2	-2.23982	-7.21365
LOC100044257	-2.24882	-4.39922
1700008I05Rik	-2.25021	-2.60455
E2f2	-2.30338	-4.69521
Clic3	-2.31252	-3.02007
Rhox10	-2.31928	-2.66039
Fst	-2.37663	-5.56937
Aldh3b1	-2.41482	-2.563
Serpinb9f	-2.44326	-3.81336
Serpinb6c	-2.50089	-2.62392
Tceal5	-2.59525	-3.4529
Pdlim3	-2.60383	-5.71855
Chrng	-2.74449	-6.2017
LOC382972	-2.76891	-5.09283
LOC638935	-2.80602	-4.62876
Mfsd7a	-2.92114	-5.84412
Slc44a4	-3.01556	-3.42809
BC025446	-3.10909	-5.56391
Fgfrl1	-3.1307	-5.03912
Slc2a6	-3.44303	-7.91437
Csrp3	-3.48877	-8.57483
Alox5	-3.56098	-4.98188
Srpk3	-3.87951	-5.54743
Gja5	-4.18232	-5.24867
Tspan32	-4.41566	-3.86488
Tceal7	-4.56192	-8.36911
